# Supplementary material for: Synthesis of enantioenriched spirocyclic 2-arylpiperidines via kinetic resolution
Source: Royal Society of Chemistry journal article supplement (doi:10.1039/d4ob00011k), 2024-01-01
Supplement: d4ob00011k1.pdf [file d4ob00011k1.pdf]

## Supporting Information

### Synthesis of Enantioenriched Spirocyclic 2-Arylpiperidines via Kinetic Resolution

*Anthony Choi, Anjan Das, Anthony J. H. M. Meijer, Ilaria Proietti Silvestri, and Iain Coldham\**

#### Contents

|     |                                                                               |       |
|-----|-------------------------------------------------------------------------------|-------|
| 1.  | General information                                                           | S-2   |
| 2.  | General procedures                                                            | S-4   |
| 3.  | Preparation of spiropiperidines <b>2a–f</b> , <b>5</b> , <b>8</b>             | S-5   |
| 4.  | Preparation of racemic disubstituted products                                 | S-14  |
| 5.  | Kinetic resolution of racemic substrates <b>2a–f</b>                          | S-23  |
| 6.  | Further functionalisation of enantioenriched compounds                        | S-30  |
| 7.  | References                                                                    | S-32  |
| 8.  | <sup>1</sup> H, <sup>19</sup> F and <sup>13</sup> C NMR spectra               | S-34  |
| 9.  | HPLC traces                                                                   | S-78  |
| 10. | X-Ray crystallography data for spiropiperidine (±)- <b>2d</b>                 | S-97  |
| 11. | X-Ray crystallography data for carbamate (3 <i>S</i> ,3 <i>S</i> )- <b>9c</b> | S-104 |
| 12. | DFT data                                                                      | S-112 |

## 1. General information

Reagents were obtained from commercial suppliers and were used without further purification or after distillation; *n*-BuLi was titrated before use. Solvents were obtained from a Grubbs dry solvent system. 2-Aryl-4-methylenepiperidines **1a–f** were synthesised using previously reported methods.<sup>1</sup> Thin layer chromatography was performed on Merck silica gel 60F254 plates and visualised by UV irradiation at 254 nm or by staining with an alkaline KMnO<sub>4</sub> dip. Flash column chromatography was performed using DAVISIL or Geduran silica gel (40-63 micron mesh). Melting points were recorded on a Gallenkamp hot stage and were uncorrected. InfraRed spectra were recorded on a Perkin Elmer Spectrum RX Fourier Transform – IR System and only selected peaks are reported. <sup>1</sup>H NMR spectra were recorded on a Bruker AC400 (400 MHz) instrument. Chemical shifts are reported in ppm with respect to the residual solvent peaks, with multiplicities given as s = singlet, d = doublet, t = triplet, q = quartet, m = multiplet, br = broad. Coupling constants (J values) are quoted to the nearest 0.5 Hz with values in Hertz (Hz). <sup>13</sup>C NMR spectra were recorded on the above instrument at 100 MHz. Low and high resolution (accurate mass) mass spectra were recorded on a Walters LCT instrument for Electro–Spray (ES).

Intensity data for X-ray crystal structures were collected at 100 K on a Bruker D8 Venture diffractometer using a Cu K $\alpha$  microfocus X-ray source. Suitable crystals were mounted on a MiTiGen microloop using fomblin oil and transferred directly to the cold nitrogen stream at 100 K for data collection on a Bruker D8 VENTURE diffractometer equipped with an Oxford 700+ cryostream, a PHOTON 100 CMOS detector and using Cu-K $\alpha$  micro-focus X-ray source. Intensity data was collected in shutterless mode with a final fast scan collected at lower incident beam intensity to enable correction for any detector saturation for low-angle data. Data reduction was performed using the Bruker Apex3 software.<sup>2</sup> Intensity data were corrected for absorption using empirical methods (SADABS) based upon symmetry equivalent

reflections combined with measurements at different azimuthal angles.<sup>3</sup> The crystal structure was solved using ShelXT<sup>4</sup> and refined against all  $F^2$  values using the SHELXL<sup>5</sup> accessed via the Olex2 program.<sup>6</sup> Non-hydrogen atoms were refined anisotropically. Hydrogen atoms were placed in calculated positions with idealized geometries and then refined by employing a riding model and isotropic displacement parameters.

All calculations were performed using density functional theory, employing the B3LYP<sup>7</sup> functional as implemented in the D.01 version of Gaussian 09.<sup>8</sup> Calculations included dispersion corrections using the GD3-BJ<sup>9</sup> method. Calculations used the def2TZVP<sup>10</sup> basis set. Solvent was included via the PCM method<sup>11</sup> as implemented in Gaussian with the default parameters for THF.

## 2. General procedures

### 2.1 General procedure A: Synthesis of difluoro spiropiperidines 2a–f

To a solution of 2-aryl-4-methylene-piperidine<sup>1</sup> (1 eq) in THF (0.5 M) was added NaI (0.36 eq) followed by the dropwise addition of TMSCF<sub>3</sub> (7 eq). The mixture was heated under reflux for 16 h and then was cooled to room temperature. The solvent was evaporated to give the crude product which was purified by column chromatography on silica gel to give the spiropiperidine.

### 2.2 General procedure B: Racemic lithiation–trapping of spiropiperidines

To a solution of the spiropiperidine (1 eq) in THF (0.25 M) under an argon atmosphere was added *n*-BuLi (1.2 eq, 2.0–2.4 M in hexanes) at –40 °C or –78 °C. After 10 min the electrophile (1.2–3.5 eq) was added and the mixture was warmed to room temperature over 16 h. MeOH (1 mL) was added and the solvent was evaporated to give the crude product.

### 3. Preparation of Spiropiperidines 2a–f, 5, 8

(±)-*tert*-Butyl 1,1-Difluoro-5-phenyl-6-azaspiro[2.5]octane-6-carboxylate **2a**

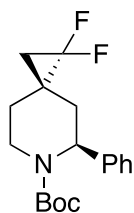

Using general procedure A, piperidine **1a** (800 mg, 2.93 mmol), NaI (158 mg, 1.05 mmol) and TMSCF<sub>3</sub> (3 mL, 21 mmol) in THF (6 mL) gave, after purification by column chromatography on silica gel, eluting with petrol–EtOAc (98:2), the spiropiperidine **2a** (796 mg, 84%) as a white amorphous solid; mp 55–57 °C (petrol–EtOAc); R<sub>f</sub> 0.47 [petrol–EtOAc (4:1)]; FT-IR  $\nu_{\text{max}}$  (film)/cm<sup>-1</sup> 1687 (C=O); <sup>1</sup>H NMR (CDCl<sub>3</sub>, 400 MHz)  $\delta$  = 7.36–7.29 (m, 2H), 7.25–7.14 (m, 3H), 5.49 (br s, 1H), 4.24 (br d, *J* = 13.0 Hz, 1H), 3.15 (td, *J* = 13.0, 3.5 Hz, 1H), 2.25 (dd, *J* = 14.5, 6.0 Hz, 1H), 2.09 (br d, *J* = 14.5 Hz, 1H), 1.94 (td, *J* = 13.0, 5.0 Hz, 1H), 1.42 (s, 9H), 1.30 (br d, *J* = 13.0 Hz, 1H), 0.94–0.76 (m, 2H); <sup>13</sup>C NMR (CDCl<sub>3</sub>, 100 MHz)  $\delta$  = 155.5, 140.3, 128.5, 126.6, 125.9, 114.8 (t, *J* = 287.5 Hz), 80.2, 53.4, 38.4, 31.1 (d, *J* = 5.0 Hz), 28.3, 28.2 (d, *J* = 5.5 Hz), 24.4 (t, *J* = 10.5 Hz), 21.7 (t, *J* = 10.0 Hz); <sup>19</sup>F NMR (CDCl<sub>3</sub>, 377 MHz)  $\delta$  = –139.67 (dd, *J* = 157.0, 12.5 Hz), –141.85 (dd, *J* = 157.0, 12.5 Hz); HRMS *m/z* (ES) Found: MNa<sup>+</sup> 346.1598. C<sub>18</sub>H<sub>23</sub>F<sub>2</sub>NO<sub>2</sub>Na requires MNa<sup>+</sup> 346.1590; LRMS *m/z* (ES) 224 (20%), 268 (100%), 269 (25%), 346 (25%, MNa<sup>+</sup>). Resolution between the enantiomers of spiropiperidine **2a** was achieved using a Agilent system fitted with a CHIRAL ART Cellulose-SC column (250 mm × 4.60 mm i.d.) as the stationary phase with a mixture of *n*-hexane:isopropanol (99:1 v/v) as the mobile phase at a flow rate of 1 mL·min<sup>-1</sup>; ambient temperature, detection by UV absorbance at 210 nm. Injection volume was 5  $\mu$ L of the sample prepared in a 2 g·L<sup>-1</sup> solution of the eluent. Under these conditions, the components were eluted at 6.9 min and 8.4 min.

(±)-*tert*-Butyl 5-(4-Fluorophenyl)-1,1-difluoro-6-azaspiro[2.5]octane-6-carboxylate **2b**

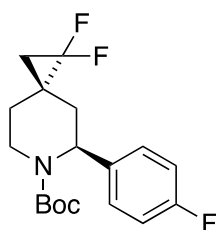

Using general procedure A, piperidine **1b** (460 mg, 1.58 mmol), NaI (85 mg, 0.57 mmol) and TMSCF<sub>3</sub> (1.6 mL, 11 mmol) in THF (3.2 mL) gave, after purification by column chromatography on silica gel, eluting with hexane–EtOAc (93:7), the spiropiperidine **2b** (455 mg, 84%) as a white amorphous solid; mp 41–43 °C (hexane–EtOAc); *R*<sub>f</sub> 0.46 [petrol–EtOAc (4:1)]; FT-IR  $\nu_{\text{max}}$  (film)/cm<sup>-1</sup> 1686 (C=O); <sup>1</sup>H NMR (CDCl<sub>3</sub>, 400 MHz)  $\delta$  = 7.20–7.09 (m, 2H), 7.07–6.97 (m, 2H), 5.44 (br s, 1H), 4.22 (br d, *J* = 13.0 Hz, 1H), 3.12 (td, *J* = 13.0, 3.5 Hz, 1H), 2.24 (dd, *J* = 14.5, 6.0 Hz, 1H), 2.03 (br d, *J* = 14.5 Hz, 1H), 1.94 (td, *J* = 13.0, 5.0 Hz, 1H), 1.42 (s, 9H), 1.31 (br d, *J* = 13.0 Hz, 1H), 0.96–0.76 (m, 2H); <sup>13</sup>C NMR (CDCl<sub>3</sub>, 100 MHz)  $\delta$  = 161.6 (d, *J* = 245.0 Hz), 155.4, 136.1, 127.4 (d, *J* = 8.0 Hz), 115.4 (d, *J* = 21.5 Hz), 114.7 (t, *J* = 287.0 Hz), 80.3, 53.0, 38.4, 31.3 (d, *J* = 5.0 Hz), 28.3, 28.1 (d, *J* = 5.5 Hz), 24.2 (t, *J* = 11.0 Hz), 21.7 (t, *J* = 10.0 Hz); <sup>19</sup>F NMR (CDCl<sub>3</sub>, 377 MHz)  $\delta$  = –116.57 (s), –139.69 (dd, *J* = 157.5, 12.5 Hz), –141.86 (dd, *J* = 157.5, 12.5 Hz); HRMS *m/z* (ES) Found: MNa<sup>+</sup> 364.1494. C<sub>18</sub>H<sub>22</sub>F<sub>3</sub>NO<sub>2</sub>Na requires MNa<sup>+</sup> 364.1495; LRMS *m/z* (ES) 222 (15%), 242 (45%), 286 (100%), 287 (45%), 364 (45%, MNa<sup>+</sup>). Resolution between the enantiomers of spiropiperidine **2b** was achieved using a Agilent system fitted with a CHIRAL ART Cellulose-SC column (250 mm × 4.60 mm i.d.) as the stationary phase with a mixture of *n*-hexane:isopropanol (99:1 v/v) as the mobile phase at a flow rate of 1 mL·min<sup>-1</sup>; ambient temperature, detection by UV absorbance at 210 nm. Injection volume was 5  $\mu$ L of the sample prepared in a 2 g·L<sup>-1</sup> solution of the eluent. Under these conditions, the components were eluted at 7.5 min and 9.1 min.

(±)-*tert*-Butyl 5-(4-Chlorophenyl)-1,1-difluoro-6-azaspiro[2.5]octane-6-carboxylate **2c**

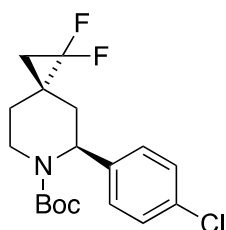

Using general procedure A, piperidine **1c** (4.4 g, 14 mmol), NaI (0.77 g, 5.2 mmol) and TMSCF<sub>3</sub> (14.8 mL, 100 mmol) in THF (29 mL) gave, after purification by column chromatography on silica gel, eluting with petrol–EtOAc (93:7) the spiropiperidine **2c** (3.6 g, 70%) as a white amorphous solid; mp 66–68 °C (petrol–EtOAc); *R*<sub>f</sub> 0.52 [petrol–EtOAc (4:1)]; FT-IR  $\nu_{\text{max}}$  (film)/cm<sup>-1</sup> 1691 (C=O); <sup>1</sup>H NMR (CDCl<sub>3</sub>, 400 MHz)  $\delta$  = 7.30 (d, *J* = 8.5 Hz, 2H), 7.11 (d, *J* = 8.5 Hz, 2H), 5.43 (br s, 1H), 4.23 (br d, *J* = 13.0 Hz, 1H), 3.10 (td, *J* = 13.0, 3.5 Hz, 1H), 2.24 (dd, *J* = 14.5, 6.0 Hz, 1H), 2.03 (br d, *J* = 14.5 Hz,

1H), 1.93 (td,  $J = 13.0, 5.0$  Hz, 1H), 1.42 (s, 9H), 1.31 (br d,  $J = 13.0$  Hz, 1H), 0.95–0.75 (m, 2H);  $^{13}\text{C}$  NMR ( $\text{CDCl}_3$ , 100 MHz, some C-F couplings not observed)  $\delta = 155.3, 139.1, 132.4, 128.7, 127.3, 114.6, 80.4, 53.1, 38.4, 31.1, 28.3, 28.0, 24.3, 21.7$  (t,  $J = 10.0$  Hz);  $^{19}\text{F}$  NMR ( $\text{CDCl}_3$ , 377 MHz)  $\delta = -139.65$  (dd,  $J = 157.5, 12.5$  Hz),  $-141.87$  (dd,  $J = 157.5, 12.5$  Hz); HRMS  $m/z$  (ES) Found:  $\text{MNa}^+$  380.1220.  $\text{C}_{18}\text{H}_{22}\text{F}_2^{35}\text{ClNO}_2\text{Na}$  requires  $\text{MNa}^+$  380.1200;  $\text{MNa}^+$  382.1190.  $\text{C}_{18}\text{H}_{22}\text{F}_2^{37}\text{ClNO}_2\text{Na}$  requires  $\text{MNa}^+$  382.1170; LRMS  $m/z$  (ES) 258 (20%) 302 (100%), 304 (35%), 380 (25%,  $\text{MNa}^+$  for  $^{35}\text{Cl}$ ), 382 (10%,  $\text{MNa}^+$  for  $^{37}\text{Cl}$ ). Resolution between the enantiomers of spiro piperidine **2c** was achieved using a Agilent system fitted with a CHIRAL ART Cellulose-SC column (250 mm  $\times$  4.60 mm i.d.) as the stationary phase with a mixture of *n*-hexane:isopropanol (99:1 v/v) as the mobile phase at a flow rate of 1 mL·min $^{-1}$ ; ambient temperature, detection by UV absorbance at 210 nm. Injection volume was 5  $\mu\text{L}$  of the sample prepared in a 2 g·L $^{-1}$  solution of the eluent. Under these conditions, the components were eluted at 6.9 min and 8.3 min.

(±)-*tert*-Butyl 5-(4-Methoxyphenyl)-1,1-difluoro-6-azaspiro[2.5]octane-6-carboxylate **2d**

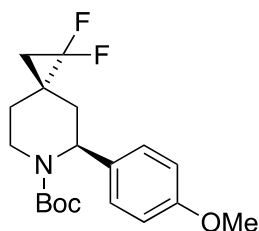

Using general procedure A, piperidine **1d** (356 mg, 1.17 mmol), NaI (63 mg, 0.42 mmol) and  $\text{TMSCF}_3$  (1.2 mL, 8.2 mmol) in THF (2.3 mL) gave, after purification by column chromatography on silica gel, eluting with petrol–EtOAc (85:15), the spiro piperidine **2d** (0.4 g, 97%) as a white amorphous solid; mp 51–53 °C (petrol–EtOAc);  $R_f$  0.45 [petrol–EtOAc (7:3)]; FT-IR  $\nu_{\text{max}}$  (film)/ $\text{cm}^{-1}$  1689 (C=O);  $^1\text{H}$  NMR ( $\text{CDCl}_3$ , 400 MHz)  $\delta = 7.08$  (d,  $J = 8.5$  Hz, 2H), 6.85 (d,  $J = 8.5$  Hz, 2H), 5.44 (br s, 1H), 4.21 (br d,  $J = 13.0$  Hz, 1H), 3.80 (s, 3H), 3.11 (td,  $J = 13.0, 3.5$  Hz, 1H), 2.22 (dd,  $J = 14.5, 6.0$  Hz, 1H), 2.04 (br d,  $J = 14.5$  Hz, 1H), 1.92 (td,  $J = 13.0, 5.0$  Hz, 1H), 1.43 (s, 9H), 1.28 (br d,  $J = 13.0$  Hz, 1H), 0.95–0.80 (m, 2H);  $^{13}\text{C}$  NMR ( $\text{CDCl}_3$ , 100 MHz)  $\delta = 158.2, 155.5, 132.1, 127.0, 114.8$  (t,  $J = 289.5$  Hz), 113.9, 80.1, 55.3, 52.9, 38.2, 31.0 (d,  $J = 5.0$  Hz), 28.4, 28.3 (d,  $J = 5.0$  Hz), 24.4 (t,  $J = 11.0$  Hz), 21.8 (t,  $J = 10.0$  Hz);  $^{19}\text{F}$  NMR ( $\text{CDCl}_3$ , 377 MHz)  $\delta = -139.64$  (dd,  $J = 157.5, 12.5$  Hz),  $-141.91$  (dd,  $J = 157.5, 12.5$  Hz); HRMS  $m/z$  (ES) Found:  $\text{MNa}^+$  376.1692.  $\text{C}_{19}\text{H}_{25}\text{F}_2\text{NO}_3\text{Na}$  requires  $\text{MNa}^+$  376.1695; LRMS  $m/z$  (ES) 190 (100%), 254 (80%), 298 (90%), 376 (75%,  $\text{MNa}^+$ ). Resolution between the enantiomers of

spiropiperidine **2d** was achieved using a Agilent system fitted with a CHIRAL ART Cellulose-SC column (250 mm x 4.60 mm i.d.) as the stationary phase with a mixture of *n*-hexane:isopropanol (99:1 v/v) as the mobile phase at a flow rate of 1 mL·min<sup>-1</sup>; ambient temperature, detection by UV absorbance at 210 nm. Injection volume was 5 μL of the sample prepared in a 2 g·L<sup>-1</sup> solution of the eluent. Under these conditions, the components were eluted at 11.3 min and 13.2 min.

(±)-*tert*-Butyl 5-(4-Methylphenyl)-1,1-difluoro-6-azaspiro[2.5]octane-6-carboxylate **2e**

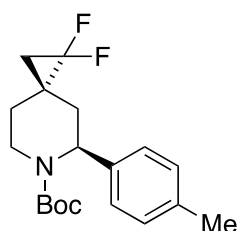

Using general procedure A, piperidine **1e** (536 mg, 1.86 mmol), NaI (100 mg, 0.67 mmol) and TMSCF<sub>3</sub> (1.9 mL, 13 mmol) in THF (3.7 mL) gave, after purification by column chromatography on silica gel, eluting with petrol–EtOAc (92:8), the spiropiperidine **2e** (0.58 g, 92%) as a clear oil; *R*<sub>f</sub> 0.43 [petrol–EtOAc (4:1)]; FT-IR  $\nu_{\max}$  (film)/cm<sup>-1</sup> 1692 (C=O); <sup>1</sup>H NMR (CDCl<sub>3</sub>, 400 MHz)  $\delta$  = 7.13 (d, *J* = 8.0 Hz, 2H), 7.06 (d, *J* = 8.0 Hz, 2H), 5.46 (br s, 1H), 4.22 (br d, *J* = 13.0 Hz, 1H), 3.11 (td, *J* = 13.0, 3.5 Hz, 1H), 2.33 (s, 3H), 2.23 (dd, *J* = 14.5, 6.0 Hz, 1H), 2.07 (br d, *J* = 14.5 Hz, 1H), 1.92 (td, *J* = 13.0, 5.0 Hz, 1H), 1.43 (s, 9H), 1.28 (br d, *J* = 13.0 Hz, 1H), 0.95–0.78 (m, 2H); <sup>13</sup>C NMR (CDCl<sub>3</sub>, 100 MHz)  $\delta$  = 155.5, 137.0, 136.1, 129.2, 125.8, 114.9 (t, *J* = 287.0 Hz), 80.1, 53.2, 38.3, 30.9 (d, *J* = 5.0 Hz), 28.4, 28.3 (d, *J* = 5.0 Hz), 24.4 (t, *J* = 11.0 Hz), 21.8 (t, *J* = 10.0 Hz), 20.9; <sup>19</sup>F NMR (CDCl<sub>3</sub>, 377 MHz)  $\delta$  = -139.65 (dd, *J* = 157.5, 14.5 Hz), -141.90 (dd, *J* = 157.5, 14.5 Hz); HRMS *m/z* (ES) Found: MNa<sup>+</sup> 360.1761. C<sub>19</sub>H<sub>25</sub>F<sub>2</sub>NO<sub>2</sub>Na requires MNa<sup>+</sup> 360.1746; LRMS *m/z* (ES) 282 (100%), 283 (20%), 360 (20%, MNa<sup>+</sup>). Resolution between the enantiomers of spiropiperidine **2e** was achieved using a Agilent system fitted with a CHIRAL ART Cellulose-SC column (250 mm x 4.60 mm i.d.) as the stationary phase with a mixture of *n*-hexane:isopropanol (99:1 v/v) as the mobile phase at a flow rate of 1 mL·min<sup>-1</sup>; ambient temperature, detection by UV absorbance at 210 nm. Injection volume was 5 μL of the sample prepared in a 2 g·L<sup>-1</sup> solution of the eluent. Under these conditions, the components were eluted at 7.6 min and 9.1 min.



(±)-*tert*-Butyl 1,1-Difluoro-5-(3-(trifluoromethyl)phenyl)-6-azaspiro[2.5]octane-6-carboxylate **2f**

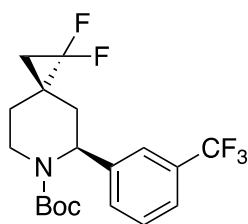

Using general procedure A, piperidine **1f** (583 mg, 1.49 mmol), NaI (80 mg, 0.54 mmol) and  $\text{TMSCF}_3$  (1.5 mL, 10 mmol) in THF (3 mL) gave, after purification by column chromatography on silica gel, eluting with petrol–EtOAc (93:7), the spiropiperidine **2f** (0.56 g, 95%) as a clear oil;  $R_f$  0.40 [petrol–EtOAc (4:1)]; FT-IR  $\nu_{\text{max}}$  (film)/ $\text{cm}^{-1}$  1693 (C=O);  $^1\text{H}$  NMR ( $\text{CDCl}_3$ , 400 MHz)  $\delta$  = 7.58–7.34 (m, 4H), 5.47 (br s, 1H), 4.24 (br d,  $J$  = 13.5 Hz, 1H), 3.21–3.06 (m, 1H), 2.28 (dd,  $J$  = 14.5, 6.0 Hz, 1H), 2.08 (br d,  $J$  = 14.5 Hz, 1H), 1.96 (td,  $J$  = 13.5, 5.0 Hz, 1H), 1.42 (s, 9H), 1.35 (br d,  $J$  = 13.5 Hz, 1H), 0.99–0.72 (m, 2H);  $^{13}\text{C}$  NMR ( $\text{CDCl}_3$ , 100 MHz, no coupling observed for  $\text{CF}_3$  quaternary carbon)  $\delta$  = 155.3, 142.0, 131.0 (q,  $J$  = 32.5 Hz), 129.3, 129.1, 125.4, 123.8 – 123.5 (m), 122.8 – 122.6 (m), 114.5 (t,  $J$  = 287.0 Hz), 80.6, 53.5, 38.6, 31.2 (d,  $J$  = 5.0 Hz), 28.3, 27.9 (d,  $J$  = 5.5 Hz), 24.1 (t,  $J$  = 11.0 Hz), 21.7 (t,  $J$  = 10.0 Hz);  $^{19}\text{F}$  NMR ( $\text{CDCl}_3$ , 377 MHz)  $\delta$  = –62.67 (s), –139.74 (dd,  $J$  = 157.5, 12.5 Hz), –141.74 (dd,  $J$  = 157.5, 12.5 Hz); HRMS  $m/z$  (ES) Found:  $\text{MNa}^+$  414.1454.  $\text{C}_{19}\text{H}_{22}\text{F}_5\text{NO}_2\text{Na}$  requires  $\text{MNa}^+$  414.1463; LRMS  $m/z$  (ES) 292 (60%), 336 (100%), 337 (30%), 414 (30%,  $\text{MNa}^+$ ). Resolution between the enantiomers of spiropiperidine **2f** was achieved using a Agilent system fitted with a CHIRAL ART Cellulose-SC column (250 mm  $\times$  4.60 mm i.d.) as the stationary phase with a mixture of *n*-hexane:isopropanol (99:1 v/v) as the mobile phase at a flow rate of 1  $\text{mL}\cdot\text{min}^{-1}$ ; ambient temperature, detection by UV absorbance at 210 nm. Injection volume was 5  $\mu\text{L}$  of the sample prepared in a 2  $\text{g}\cdot\text{L}^{-1}$  solution of the eluent. Under these conditions, the components were eluted at 5.6 min and 6.2 min.

(±)-6-*tert*-Butyl 6-Azaspiro[2.5]octane-5,6-dicarboxylate **4**

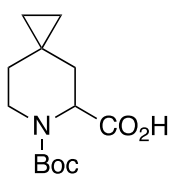

Following a related method,<sup>12</sup> *N*-Boc-4-methylenepiperidine **3**<sup>13</sup> (5 g, 25.3 mmol), benzyltriethylammonium chloride (560 mg, 2.5 mmol) and  $\text{CHCl}_3$  (70 mL) were heated to 50  $^\circ\text{C}$  then

NaOH (10 g, 250 mmol) in water (20 mL) was dropwise. After 3 h, the mixture was cooled to room temperature. After 16 h, CHCl<sub>3</sub> (150 mL) and water (150 mL) were added and the organic phase was separated, washed with water (200 mL), brine (200 mL) and dried (MgSO<sub>4</sub>). The solvent was evaporated to give the dichlorocyclopropane product (6.0 g, 85%) as a white solid; m.p. 70–72 °C. This was used directly in the next step.

The dichlorospiropiperidine (3.5 g, 12.5 mmol) in *tert*-butanol (100 mL) and Et<sub>2</sub>O (200 mL) was heated under reflux. Li granules (800 mg, 700 mmol) were added to the mixture portionwise over 48 h. Water was added and the mixture was extracted with Et<sub>2</sub>O (3 x 100 mL). The organic layers were washed with water (200 mL), brine (150 mL) and were dried (MgSO<sub>4</sub>). The solvent was evaporated and the mixture was purified by column chromatography on silica gel, eluting with hexane–EtOAc (9:1), to give the spiropiperidine (2.4 g, 92%) as an oil; R<sub>f</sub> 0.7 [hexane–EtOAc (9:1)]; <sup>1</sup>H-NMR (400 MHz, CDCl<sub>3</sub>) δ = 3.45 (t, 4H, *J* = 4 Hz), 1.49 (s, 9H), 1.34 (t, 4H, *J* = 4 Hz), 0.34 (s, 4H); <sup>13</sup>C NMR (100 MHz, CDCl<sub>3</sub>) δ 155.0, 79.2, 43.6, 34.9, 28.4, 17.6, 11.3; <sup>1</sup>H NMR data as reported.<sup>14</sup>

*sec*-BuLi (24 mL, 13.6 mmol) was added to the spiropiperidine (2.4 g, 11.4 mmol) and TMEDA (7 mL, 45.4 mmol) in Et<sub>2</sub>O (60 mL) at –40 °C. After 3 h, dry CO<sub>2</sub> was added (prepared<sup>15</sup> from 100 g dry ice crushed in a mortar and pestle under a continuous flow of nitrogen and mixed into anhydrous THF under nitrogen and filtered). The mixture was allowed to warm to room temperature. After 1 h, the solvent was evaporated, water (150 mL) was added, and the mixture was adjusted to pH to 2 by adding aqueous HCl (1 M). The mixture was extracted with EtOAc (3 x 50 mL), washed with brine (100 mL) and dried (MgSO<sub>4</sub>) to give the carboxylic acid **4** (1.6 g, 56%) as a white solid; m.p. 95–97 °C; <sup>1</sup>H NMR (400 MHz, CDCl<sub>3</sub>, ~1:1 mixture of rotamers) δ = 8.50 (br s, 1H), 4.97 (br s, 0.5H), 4.79 (br s, 0.5H), 4.06 (br d, 0.5H, *J* = 12 Hz), 3.96 (br d, 0.5H, *J* = 12 Hz), 3.26–3.15 (m, 1H), 2.20 (dd, 1H, *J* = 12, 4 Hz), 1.92 (td, 1H, *J* = 12 Hz, 4 Hz), 1.60–1.58 (m, 1H), 1.49 (s, 9H), 0.88–0.79 (m, 1H), 0.43–0.32 (m, 4H); <sup>13</sup>C NMR (100 MHz, CDCl<sub>3</sub>, rotamers) δ 178.2, 178.1, 156.1, 155.6, 80.4, 54.7, 53.6, 41.3, 40.4, 35.0, 34.1, 33.8, 29.7, 28.3, 22.7, 15.2, 14.1, 10.8, 10.5; HRMS *m/z* (ES) Found: [MH<sup>+</sup> – Boc] 156.1028. C<sub>8</sub>H<sub>14</sub>NO<sub>2</sub> requires MH<sup>+</sup> – Boc 156.1025; <sup>1</sup>H NMR data as reported.<sup>16</sup>

(±)-*tert*-Butyl 5-(4-Chlorophenyl)-6-azaspiro[2.5]octane-6-carboxylate **5**

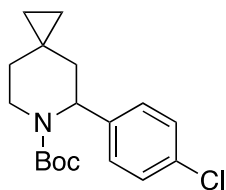

The carboxylic acid **4** (510 mg, 2 mmol), Ir[dF(CF<sub>3</sub>)ppy]<sub>2</sub>(dtbbpy)PF<sub>6</sub> (15 mg, 14 μmol), 1-chloro-4-iodobenzene (806 mg, 3.3 mmol), nickel(II)chloride-glyme (30 mg, 0.14 mmol), 4,4'-di-*tert*-butyl-2,2'-dipyridyl (54 mg, 0.20 mmol), cesium carbonate (655 mg, 2.0 mmol) in DMF (50 mL) were degassed (freeze pump thaw with liquid nitrogen). The mixture was irradiated with a blue LED (34 W, 460 nm) with a cooling fan. After 24 h, saturated aqueous NaHCO<sub>3</sub> solution (20 mL) was added and the mixture was extracted with EtOAc (3 × 100 mL). The combined organic layers were washed with water (100 mL) and brine (100 mL), dried (MgSO<sub>4</sub>), and evaporated. Purification by column chromatography on silica gel, eluting with hexane–EtOAc (9:1), gave the carbamate **5** (398 mg, 62%) as an oil; R<sub>f</sub> 0.8 [hexane–EtOAc (4:1)]; FT-IR ν<sub>max</sub> (film)/cm<sup>-1</sup> 2976, 2931, 1687, 1491, 1409, 1391, 1152, 770; <sup>1</sup>H NMR (400 MHz, CDCl<sub>3</sub>) δ = 7.30–7.27 (m, 2H), 7.15–7.13 (m, 2H), 5.38 (br d, 1H, *J* = 5 Hz), 4.16 (ddd, 1H, *J* = 13, 5, 1 Hz), 3.08 (td, 1H, *J* = 13, 5 Hz), 2.32 (ddd, 1H, *J* = 13, 5, 1 Hz), 1.94 (tdd, 1H, *J* = 13, 5, 1 Hz), 1.60–1.55 (m, 1H), 1.44 (s, 9H), 0.88–0.85 (m, 1H), 0.30–0.22 (m, 2H), 0.18–0.14 (m, 1H), 0.09–0.04 (m, 1H); <sup>13</sup>C NMR (100 MHz, CDCl<sub>3</sub>) δ = 155.6, 140.2, 131.8, 128.3, 127.5, 79.8, 53.9, 39.9, 37.7, 34.5, 28.3, 14.2, 12.7, 10.5; HRMS *m/z* (ES) Found: MH<sup>+</sup>–C<sub>4</sub>H<sub>8</sub> 266.0954. C<sub>14</sub>H<sub>17</sub><sup>35</sup>ClNO<sub>2</sub> requires MH<sup>+</sup>–C<sub>4</sub>H<sub>8</sub> 266.0948. The enantiomers were resolved using a Beckman system fitted with a Lux Cellulose–2 column (250 mm x 4.6 mm i.d.) as the stationary phase with a mixture of *n*-hexane–isopropanol (95:5 v/v) as the mobile phase at a flow rate of 0.8 mL/min; room temperature, detection by UV absorbance at 254 nm. Injection volume 20 μL of the sample prepared in a 20 mg in 1 mL of the eluent. Retention times 17.6 and 19.8 min.

(±)-8-*tert*-Butyl 8-Azaspiro[4.5]decane-7,8-dicarboxylate **7**

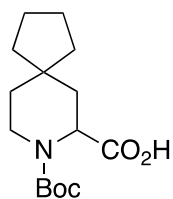

8-Azaspiro[4.5]decane-7,9-dione (5 g, 30 mmol) in THF (100 mL) was added slowly to a suspension of  $\text{LiAlH}_4$  (6 g, 150 mmol) in THF (200 mL) at 0 °C.<sup>17</sup> After 15 min, the mixture was warmed to room temperature and was then heated under reflux. After 16 h, the mixture was cooled 0 °C and was quenched with water and aqueous NaOH. The white solid formed was filtered and the mixture was extracted with EtOAc (3 x 200 mL), washed with water (200 mL), brine (200 mL) and dried ( $\text{MgSO}_4$ ). The solvent was evaporated, the crude product was dissolved in THF (200 mL) and was cooled to 0 °C.  $\text{Boc}_2\text{O}$  (4.0 g, 18.3 mmol) was added, the mixture was stirred for 16 h then the solvent was evaporated. The mixture was dissolved in EtOAc (250 mL), washed with water (200 mL), brine (200 mL) and was dried ( $\text{MgSO}_4$ ). Purification by column chromatography on silica gel, eluting with hexane–EtOAc (4:1), gave the spiropiperidine **6** (3 g, 42%) as an oil;  $R_f$  0.8 [hexane–EtOAc (4:1)]; FT-IR  $\nu_{\text{max}}$  (film)/ $\text{cm}^{-1}$  1738, 1438, 1365, 1231, 1216, 1208, 800;  $^1\text{H-NMR}$  (400 MHz,  $\text{CDCl}_3$ )  $\delta$  = 3.38 (t, 4H,  $J$  = 4 Hz), 1.65–1.62 (m, 4H), 1.47 (s, 9H), 1.46–1.40 (m, 8H);  $^{13}\text{C NMR}$  (100 MHz,  $\text{CDCl}_3$ )  $\delta$  = 155.0, 79.1, 42.2, 41.0, 37.6, 37.3, 28.5, 24.2. *sec*-BuLi (8.3 mL, 10.0 mmol, 1.2 M in cyclohexane) was added to the spiropiperidine **6** (2.0 g, 8.4 mmol) and TMEDA (5 mL, 33 mmol) in  $\text{Et}_2\text{O}$  (35 mL) at –40 °C. After 3 h, dry  $\text{CO}_2$  was added (prepared<sup>15</sup> from 60 g dry ice crushed in a mortar and pestle under a continuous flow of nitrogen and mixed into anhydrous THF under nitrogen and filtered). The mixture was allowed to warm to room temperature. After 1 h, the solvent was evaporated, water (100 mL) was added, and the mixture was adjusted to pH to 2 by adding aqueous HCl (2 M). The mixture was extracted with EtOAc (3 x 50 mL) and the solvent was dried ( $\text{MgSO}_4$ ) to give the carboxylic acid **7** (2.0 g, 86%) as a white solid; m.p. 99–101 °C; FT-IR  $\nu_{\text{max}}$  (film)/ $\text{cm}^{-1}$  2950, 2871, 1738, 1697, 1394, 1366, 1253, 1140, 951, 773;  $^1\text{H NMR}$  (400 MHz,  $\text{CDCl}_3$ , ~1:1 mixture of rotamers)  $\delta$  = 8.95 (br s, 1H), 4.83 (br s, 0.5H), 4.66 (br s, 0.5H), 3.90 (br s, 1H), 3.13 (br s, 1H), 2.13–2.10 (m, 1H), 1.85–1.79 (m, 1H), 1.68–1.60 (m, 4H), 1.46–1.27 (m, 15H);  $^{13}\text{C NMR}$  (100 MHz,  $\text{CDCl}_3$ , rotamers)  $\delta$  = 179.2, 179.0, 156.0, 155.6, 80.2, 53.8, 52.7, 41.6, 40.4, 39.5, 38.5, 37.3, 35.5, 33.0, 28.3, 24.5, 22.9; HRMS  $m/z$  (ES) Found:  $[\text{MH}^+ - \text{Boc}]$  184.1329.  $\text{C}_{10}\text{H}_{18}\text{NO}_2$  requires  $\text{MH}^+ - \text{Boc}$  184.1338.

(±)-*tert*-Butyl 7-(4-Chlorophenyl)-8-azaspiro[4.5]decane-8-carboxylate **8**

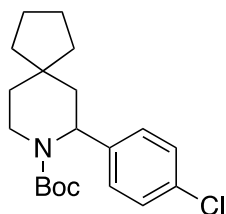

The carboxylic acid **7** (566 mg, 2 mmol), Ir[dF(CF<sub>3</sub>)ppy]<sub>2</sub>(dtbbpy)PF<sub>6</sub> (15 mg, 14 μmol), 1-chloro-4-iodobenzene (806 mg, 3.3 mmol), nickel(II)chloride-glyme (30 mg, 0.14 mmol), 4,4'-di-*tert*-butyl-2,2'-dipyridyl (54 mg, 0.20 mmol), cesium carbonate (655 mg, 2.0 mmol) in DMF (50 mL) were degassed (freeze pump thaw with liquid nitrogen). The mixture was irradiated with a blue LED (34 W, 460 nm) with a cooling fan. After 24 h, saturated aqueous NaHCO<sub>3</sub> solution (20 mL) was added and the mixture was extracted with EtOAc (3 × 100 mL). The combined organic layers were washed with water (100 mL) and brine (100 mL), dried (MgSO<sub>4</sub>), and evaporated. Purification by column chromatography on silica gel, eluting with hexane–EtOAc (9:1), gave the carbamate **8** (405 mg, 58%) as an oil; R<sub>f</sub> 0.7 [hexane–EtOAc (4:1)]; FT-IR ν<sub>max</sub> (film)/cm<sup>-1</sup> 2936, 2868, 1692, 1491, 1421, 770 ; <sup>1</sup>H NMR (400 MHz, CDCl<sub>3</sub>) δ = 7.29 (d, 2H, *J* = 8 Hz), 7.11 (d, 2H, *J* = 8 Hz), 5.22 (t, 1H, *J* = 4 Hz), 4.10 (dt, 1H, *J* = 13, 4 Hz), 3.39–3.36 (m, 1H), 3.10 (ddd, 1H, *J* = 13, 11.5, 4 Hz), 2.05–2.00 (m, 1H), 1.93 (dd, 1H, *J* = 14, 4 Hz), 1.64–1.61 (m, 1H), 1.55–1.50 (m, 3H), 1.43–1.41 (m, 3H), 1.39 (s, 9H), 1.09–0.03 (m, 1H), 0.97–0.89 (m, 1H); <sup>13</sup>C NMR (100 MHz, CDCl<sub>3</sub>) δ = 155.6, 141.3, 131.7, 128.4, 126.8, 79.7, 53.3, 41.5, 40.6, 38.4, 37.5, 35.7, 28.3, 24.2, 24.1, 22.6; HRMS *m/z* (ES) Found: MH<sup>+</sup>-*t*Bu 294.1266. C<sub>16</sub>H<sub>21</sub><sup>35</sup>ClNO<sub>2</sub> requires MH<sup>+</sup>-*t*Bu 294.1261. The enantiomers were resolved using a Beckman system fitted with a Lux Amylose–2 column (250 mm x 4.6 mm i.d.) as the stationary phase with a mixture of *n*-hexane–isopropanol (95:5 v/v) as the mobile phase at a flow rate of 0.8 mL/min; room temperature, detection by UV absorbance at 254 nm. Injection volume 20 μL of the sample prepared in a 20 mg in 1 mL of the eluent. Retention times 7.08 and 7.93 min.

#### 4. Preparation of racemic disubstituted products

(±)-6-*tert*-Butyl 5-Methyl 1,1-Difluoro-5-phenyl-6-azaspiro[2.5]octane-5,6-dicarboxylate **9a**

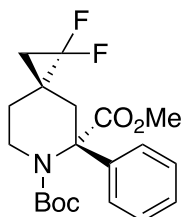

Using general procedure B, *n*-BuLi (0.15 mL, 0.37 mmol, 2.4 M in hexanes) and spiropiperidine **2a** (100 mg, 0.31 mmol) in THF (1.3 mL) at  $-40\text{ }^{\circ}\text{C}$  and MeOCOCl (0.08 mL, 1 mmol) gave, after purification by column chromatography on silica gel, eluting with pentane–EtOAc (9:1), the carbamate **9a** (100 mg, 85%) as an oil;  $R_f$  0.39 [petrol–EtOAc (4:1)]; FT-IR  $\nu_{\text{max}}$  (film)/ $\text{cm}^{-1}$  1746, 1694;  $^1\text{H}$  NMR ( $\text{CDCl}_3$ , 400 MHz)  $\delta$  = 7.44 (d,  $J$  = 7.5 Hz, 2H), 7.33 (t,  $J$  = 7.5 Hz, 2H), 7.29–7.22 (m, 1H), 4.07 (dt,  $J$  = 13.5, 5.5 Hz, 1H), 3.76 (s, 3H), 3.69–3.52 (m, 1H), 2.45 (br d,  $J$  = 14.5 Hz, 1H), 2.25–2.10 (m, 2H), 1.54–1.48 (m, 1H), 1.28 (br s, 9H), 0.84–0.68 (m, 2H);  $^{13}\text{C}$  NMR ( $\text{CDCl}_3$ , 100 MHz, some C could not be observed)  $\delta$  = 172.5, 155.3, 127.7, 127.1, 127.0, 114.2 (t,  $J$  = 288.0 Hz), 81.1, 66.7, 52.5, 39.9, 28.0, 26.9, 22.5 (t,  $J$  = 10.0 Hz);  $^{19}\text{F}$  NMR ( $\text{CDCl}_3$ , 377 MHz, rotamers)  $\delta$  =  $-138.13$  –  $-141.05$  (m); HRMS  $m/z$  (ES) Found:  $\text{MNa}^+$  404.1658.  $\text{C}_{20}\text{H}_{25}\text{F}_2\text{NO}_4\text{Na}$  requires  $\text{MNa}^+$  404.1644; LRMS  $m/z$  (ES) 282 (100%), 283 (60%), 373 (15%), 401 (30%), 404 (95%,  $\text{MNa}^+$ ). Resolution between the enantiomers of carbamate **9a** was achieved using a Agilent system fitted with a CHIRAL ART Cellulose-SC column (250 mm  $\times$  4.60 mm i.d.) as the stationary phase with a mixture of *n*-hexane:isopropanol (99:1 v/v) as the mobile phase at a flow rate of  $1\text{ mL}\cdot\text{min}^{-1}$ ; ambient temperature, detection by UV absorbance at 210 nm. Injection volume was  $5\text{ }\mu\text{L}$  of the sample prepared in a  $2\text{ g}\cdot\text{L}^{-1}$  solution of the eluent. Under these conditions, the components were eluted at 11.5 min and 16.0 min.

(±)-6-(*tert*-Butyl) 5-Methyl 5-(4-Fluorophenyl)-1,1-difluoro-6-azaspiro[2.5]octane-5,6-dicarboxylate **9b**

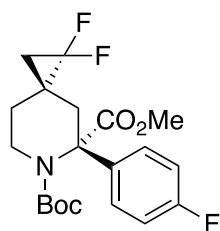

Using general procedure B, *n*-BuLi (0.17 mL, 0.37 mmol, 2.2 M in hexanes) and spiropiperidine **2b** (105 mg, 0.31 mmol) in THF (1.3 mL) at  $-40\text{ }^{\circ}\text{C}$  and MeOCOCl (0.08 mL, 1 mmol) gave, after purification by column chromatography on silica gel, eluting with hexane–EtOAc (92:8), the carbamate **9b** (111 mg, 90%) as a white amorphous solid; mp  $92\text{--}94\text{ }^{\circ}\text{C}$  (hexane–EtOAc);  $R_f$  0.38 [petrol–EtOAc (4:1)]; FT-IR  $\nu_{\text{max}}$  (film)/ $\text{cm}^{-1}$  1747, 1696;  $^1\text{H}$  NMR ( $\text{CDCl}_3$ , 400 MHz)  $\delta$  = 7.50–7.34 (m, 2H), 7.07–6.97 (m, 2H), 4.05 (dt,  $J$  = 13.5, 5.5 Hz, 1H), 3.76 (s, 3H), 3.66–3.52 (m, 1H), 2.42 (br d,  $J$  = 14.5 Hz, 1H), 2.25–2.14 (m, 1H), 2.10 (br d,  $J$  = 14.5 Hz, 1H), 1.54–1.46 (m, 1H), 1.28 (br s, 9H), 0.89–0.70 (m, 2H);  $^{13}\text{C}$  NMR ( $\text{CDCl}_3$ , 100 MHz, some C could not be observed)  $\delta$  = 172.5, 161.9 (d,  $J$  = 246.0 Hz), 155.1, 128.7 (d,  $J$  = 7.5 Hz), 114.5 (d,  $J$  = 21.5 Hz), 114.1 (t,  $J$  = 288.0 Hz), 81.3, 66.2, 52.6, 39.8, 28.0, 26.8, 22.6 (t,  $J$  = 9.5 Hz);  $^{19}\text{F}$  NMR ( $\text{CDCl}_3$ , 377 MHz, rotamers)  $\delta$  =  $-115.96$  (s),  $-138.10$  –  $-141.87$  (m); HRMS  $m/z$  (ES) Found:  $\text{MNa}^+$  422.1556.  $\text{C}_{20}\text{H}_{24}\text{F}_3\text{NO}_4\text{Na}$  requires  $\text{MNa}^+$  422.1550; LRMS  $m/z$  (ES) 300 (100%), 363 (15%), 391 (20%), 419 (15%), 422 (90%,  $\text{MNa}^+$ ). Resolution between the enantiomers of carbamate **9b** was achieved using a Agilent system fitted with a CHIRAL ART Cellulose-SC column (250 mm  $\times$  4.60 mm i.d.) as the stationary phase with a mixture of *n*-hexane:isopropanol (99:1 v/v) as the mobile phase at a flow rate of  $1\text{ mL}\cdot\text{min}^{-1}$ ; ambient temperature, detection by UV absorbance at 210 nm. Injection volume was 5  $\mu\text{L}$  of the sample prepared in a  $2\text{ g}\cdot\text{L}^{-1}$  solution of the eluent. Under these conditions, the components were eluted at 8.9 min and 11.0 min.

(±)-6-(*tert*-Butyl) 5-Methyl 5-(4-Chlorophenyl)-1,1-difluoro-6-azaspiro[2.5]octane-5,6-dicarboxylate **9c**

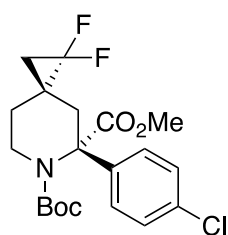

Using general procedure B, *n*-BuLi (0.15 mL, 0.35 mmol, 2.3 M in hexanes) and spiropiperidine **2c** (105 mg, 0.29 mmol) in THF (1.2 mL) at  $-40\text{ }^{\circ}\text{C}$  and MeOCOCl (0.08 mL, 1 mmol) gave, after purification by column chromatography on silica gel, eluting with petrol–EtOAc (92:8), the carbamate **9c** (108 mg, 89%) as a white amorphous solid; mp  $120\text{--}122\text{ }^{\circ}\text{C}$  (petrol–EtOAc);  $R_f$  0.36 [petrol–EtOAc (4:1)]; FT-IR  $\nu_{\text{max}}$  (film)/ $\text{cm}^{-1}$  1743, 1694;  $^1\text{H}$  NMR ( $\text{CDCl}_3$ , 400 MHz)  $\delta$  = 7.45–7.36 (m, 2H), 7.33–7.28 (m, 2H), 4.04 (dt,  $J$  = 13.5, 5.5 Hz, 1H), 3.76 (s, 3H), 3.65–3.55 (m, 1H), 2.41 (br d,  $J$  = 14.5 Hz, 1H), 2.25–2.14 (m, 1H), 2.10 (br d,  $J$  = 14.5 Hz, 1H), 1.54–1.46 (m, 1H), 1.28 (br s, 9H), 0.92–0.67 (m, 2H);  $^{13}\text{C}$  NMR ( $\text{CDCl}_3$ , 100 MHz, some C could not be observed)  $\delta$  = 172.3, 133.1, 128.4, 127.9, 114.0 (t,  $J$  = 288.0 Hz), 81.4, 66.3, 52.6, 39.8, 28.0, 26.8, 22.7 (t,  $J$  = 10.0 Hz);  $^{19}\text{F}$  NMR ( $\text{CDCl}_3$ , 377 MHz, rotamers)  $\delta$  =  $-138.58$  –  $-140.99$  (m); HRMS  $m/z$  (ES) Found:  $\text{MNa}^+$  438.1243.  $\text{C}_{20}\text{H}_{24}\text{F}_2^{35}\text{ClNO}_4\text{Na}$  requires  $\text{MNa}^+$  438.1255; Found:  $\text{MNa}^+$  440.1226.  $\text{C}_{20}\text{H}_{24}\text{F}_2^{37}\text{ClNO}_4\text{Na}$  requires  $\text{MNa}^+$  440.1225; LRMS  $m/z$  (ES) 316 (100%), 318 (30%), 438 (35%,  $\text{MNa}^+$  for  $^{35}\text{Cl}$ ), 440 (10%,  $\text{MNa}^+$  for  $^{37}\text{Cl}$ ). Resolution between the enantiomers of carbamate **9c** was achieved using a Agilent system fitted with a CHIRAL ART Cellulose-SC column (250 mm  $\times$  4.60 mm i.d.) as the stationary phase with a mixture of *n*-hexane:isopropanol (99:1 v/v) as the mobile phase at a flow rate of  $1\text{ mL}\cdot\text{min}^{-1}$ ; ambient temperature, detection by UV absorbance at 210 nm. Injection volume was  $5\text{ }\mu\text{L}$  of the sample prepared in a  $2\text{ g}\cdot\text{L}^{-1}$  solution of the eluent. Under these conditions, the components were eluted at 9.6 min and 12.8 min.



(±)-6-(*tert*-Butyl) 5-Methyl 5-(4-Methoxyphenyl)-1,1-difluoro-6-azaspiro[2.5]octane-5,6-dicarboxylate

**9d**

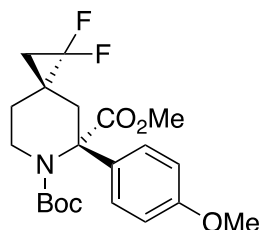

Using general procedure B, *n*-BuLi (0.15 mL, 0.37 mmol, 2.4 M in hexanes) and spiropiperidine **2d** (109 mg, 0.31 mmol) in THF (1.3 mL) at  $-40\text{ }^{\circ}\text{C}$  and MeOCOCI (0.08 mL, 1 mmol) gave, after purification by column chromatography on silica gel, eluting with pentane–EtOAc (9:1), the carbamate **9d** (79 mg, 62%) as an oil;  $R_f$  0.23 [petrol–EtOAc (4:1)]; FT-IR  $\nu_{\text{max}}$  (film)/ $\text{cm}^{-1}$  1744, 1694;  $^1\text{H}$  NMR ( $\text{CDCl}_3$ , 400 MHz)  $\delta$  = 7.37–7.29 (m, 2H), 6.90–6.82 (m, 2H), 4.05 (dt,  $J$  = 13.5, 5.5 Hz, 1H), 3.81 (s, 3H), 3.74 (s, 3H), 3.62–3.49 (m, 1H), 2.44 (br d,  $J$  = 14.5 Hz, 1H), 2.22–2.05 (m, 2H), 1.54–1.43 (m, 1H), 1.30 (br s, 9H), 0.85–0.69 (m, 2H);  $^{13}\text{C}$  NMR ( $\text{CDCl}_3$ , 100 MHz, some C could not be observed)  $\delta$  = 172.8, 158.6, 155.3, 128.2, 114.2 (t,  $J$  = 288.0 Hz), 113.0, 81.1, 66.3, 55.3, 52.4, 40.8, 39.9, 28.1, 26.9, 22.5 (t,  $J$  = 10.0 Hz);  $^{19}\text{F}$  NMR ( $\text{CDCl}_3$ , 377 MHz, rotamers)  $\delta$  =  $-138.47$  –  $-141.05$  (m); HRMS  $m/z$  (ES) Found:  $\text{MNa}^+$  434.1752.  $\text{C}_{21}\text{H}_{27}\text{F}_2\text{NO}_5\text{Na}$  requires  $\text{MNa}^+$  434.1750; LRMS  $m/z$  (ES) 312 (100%), 431 (35%), 434 (70%,  $\text{MNa}^+$ ). Resolution between the enantiomers of carbamate **9d** was achieved using a Agilent system fitted with a CHIRAL ART Cellulose-SC column (250 mm  $\times$  4.60 mm i.d.) as the stationary phase with a mixture of *n*-hexane:isopropanol (98:2 v/v) as the mobile phase at a flow rate of 1 mL $\cdot$ min $^{-1}$ ; ambient temperature, detection by UV absorbance at 210 nm. Injection volume was 5  $\mu\text{L}$  of the sample prepared in a 2 g $\cdot$ L $^{-1}$  solution of the eluent. Under these conditions, the components were eluted at 10.5 min and 16.8 min.

(±)-6-(*tert*-Butyl) 5-Methyl 5-(4-Methylphenyl)-1,1-difluoro-6-azaspiro[2.5]octane-5,6-dicarboxylate **9e**

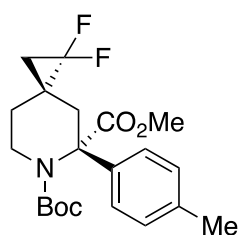

Using general procedure B, *n*-BuLi (0.15 mL, 0.37 mmol, 2.4 M in hexanes) and spiropiperidine **2e** (104 mg, 0.31 mmol) in THF (1.3 mL) at  $-40\text{ }^{\circ}\text{C}$  and MeOCOCl (0.08 mL, 1 mmol) gave, after purification by column chromatography on silica gel, eluting with pentane–EtOAc (9:1), the carbamate **9e** (106 mg, 86%) as an oil;  $R_f$  0.29 [petrol–EtOAc (4:1)]; FT-IR  $\nu_{\text{max}}$  (film)/ $\text{cm}^{-1}$  1746, 1697;  $^1\text{H}$  NMR ( $\text{CDCl}_3$ , 400 MHz)  $\delta$  = 7.28 (d,  $J$  = 8.0 Hz, 2H), 7.13 (d,  $J$  = 8.0 Hz, 2H), 4.07 (dt,  $J$  = 13.5, 5.5 Hz, 1H), 3.74 (s, 3H), 3.62–3.49 (m, 1H), 2.44 (d,  $J$  = 14.5 Hz, 1H), 2.33 (s, 3H), 2.23–2.07 (m, 2H), 1.54–1.42 (m, 1H), 1.30 (br s, 9H), 0.87–0.71 (m, 2H);  $^{13}\text{C}$  NMR ( $\text{CDCl}_3$ , 100 MHz, some C could not be observed)  $\delta$  = 172.7, 136.8, 128.4, 126.9, 114.3 (t,  $J$  = 288.0 Hz), 81.1, 66.5, 52.4, 39.9, 28.0, 27.0, 22.5 (t,  $J$  = 9.5 Hz), 20.9;  $^{19}\text{F}$  NMR ( $\text{CDCl}_3$ , 377 MHz, rotamers)  $\delta$  =  $-137.73$  –  $-142.48$  (m); HRMS  $m/z$  (ES) Found:  $\text{MNa}^+$  418.1818.  $\text{C}_{21}\text{H}_{27}\text{F}_2\text{NO}_4\text{Na}$  requires  $\text{MNa}^+$  418.1801; LRMS  $m/z$  (ES) 296 (100%), 297 (60%), 415 (25%), 418 (80%,  $\text{MNa}^+$ ). Resolution between the enantiomers of carbamate **9e** was achieved using a Agilent system fitted with a CHIRAL ART Cellulose-SC column (250 mm  $\times$  4.60 mm i.d.) as the stationary phase with a mixture of *n*-hexane:isopropanol (99:1 v/v) as the mobile phase at a flow rate of 1 mL $\cdot$ min $^{-1}$ ; ambient temperature, detection by UV absorbance at 210 nm. Injection volume was 5  $\mu\text{L}$  of the sample prepared in a 2 g $\cdot$ L $^{-1}$  solution of the eluent. Under these conditions, the components were eluted at 10.9 min and 16.7 min.

(±)-6-(*tert*-Butyl) 5-Methyl 1,1-Difluoro-5-(3-(trifluoromethyl)phenyl)-6-azaspiro[2.5]octane-5,6-dicarboxylate **9f**

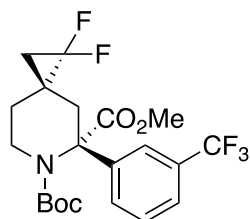

Using general procedure B, *n*-BuLi (0.17 mL, 0.37 mmol, 2.2 M in hexanes) and spiropiperidine **2f** (121 mg, 0.31 mmol) in THF (1.3 mL) at  $-40\text{ }^{\circ}\text{C}$  and MeOCOCI (0.08 mL, 1 mmol) gave, after purification by column chromatography on silica gel, eluting with pentane–EtOAc (93:7), the carbamate **9f** (116 mg, 83%) as an oil;  $R_f$  0.34 [petrol–EtOAc (4:1)]; FT-IR  $\nu_{\text{max}}$  (film)/ $\text{cm}^{-1}$  1745, 1698;  $^1\text{H}$  NMR ( $\text{CDCl}_3$ , 400 MHz)  $\delta$  = 7.80–7.64 (m, 2H), 7.55 (d,  $J$  = 8.0 Hz, 1H), 7.47 (t,  $J$  = 8.0 Hz, 1H), 4.10–4.01 (m, 1H), 3.78 (s, 3H), 3.73–3.58 (m, 1H), 2.43 (d,  $J$  = 14.5 Hz, 1H), 2.28–2.18 (m, 1H), 2.14 (d,  $J$  = 14.5 Hz, 1H), 1.61–1.53 (m, 1H), 1.26 (br s, 9H), 0.92–0.69 (m, 2H);  $^{13}\text{C}$  NMR ( $\text{CDCl}_3$ , 100 MHz, some C could not be observed)  $\delta$  = 172.1, 130.6, 128.2, 124.1–123.9 (m), 123.6–123.4 (m), 114.0 (t,  $J$  = 288.5 Hz), 81.5, 66.4, 52.7, 27.9, 26.7, 22.9–22.6 (m);  $^{19}\text{F}$  NMR ( $\text{CDCl}_3$ , 377 MHz, rotamers)  $\delta$  =  $-62.51$  (s),  $-136.78$  –  $-141.71$  (m); HRMS  $m/z$  (ES) Found:  $\text{MNa}^+$  472.1520.  $\text{C}_{21}\text{H}_{24}\text{F}_5\text{NO}_4\text{Na}$  requires  $\text{MNa}^+$  472.1518; LRMS  $m/z$  (ES) 350 (100%), 413 (15%), 441 (15%), 472 (85%,  $\text{MNa}^+$ ). Resolution between the enantiomers of carbamate **9f** was achieved using a Agilent system fitted with a CHIRAL ART Cellulose-SC column (250 mm  $\times$  4.60 mm i.d.) as the stationary phase with a mixture of *n*-hexane:isopropanol (99:1 v/v) as the mobile phase at a flow rate of  $1\text{ mL}\cdot\text{min}^{-1}$ ; ambient temperature, detection by UV absorbance at 210 nm. Injection volume was  $5\text{ }\mu\text{L}$  of the sample prepared in a  $2\text{ g}\cdot\text{L}^{-1}$  solution of the eluent. Under these conditions, the components were eluted at 6.1 min and 7.1 min.

(±)-6-*tert*-Butyl 5-Benzyl 1,1-Difluoro-5-phenyl-6-azaspiro[2.5]octane-5,6-dicarboxylate **10**

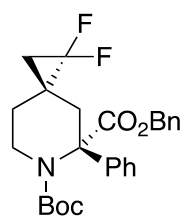

Using general procedure B, *n*-BuLi (0.16 mL, 0.37 mmol, 2.3 M in hexanes) and spiropiperidine **2a** (100 mg, 0.31 mmol) in THF (1.3 mL) at  $-40\text{ }^{\circ}\text{C}$  and BnOCOCI (0.07 mL, 0.5 mmol) gave, after

purification by column chromatography on silica gel, eluting with petrol–EtOAc (94:6), the carbamate **10** (94 mg, 66%) as an oil;  $R_f$  0.40 [petrol–EtOAc (4:1)]; FT-IR  $\nu_{\max}$  (film)/ $\text{cm}^{-1}$  1743, 1692;  $^1\text{H}$  NMR ( $\text{CDCl}_3$ , 400 MHz)  $\delta$  = 7.52–7.14 (m, 10H), 5.22–5.04 (m, 2H), 4.04–3.92 (m, 1H), 3.77–3.50 (m, 1H), 2.50 (d,  $J$  = 14.5 Hz, 1H), 2.21–1.99 (m, 2H), 1.54–1.36 (m, 1H), 1.21 (br s, 9H), 0.81–0.57 (m, 2H);  $^{13}\text{C}$  NMR ( $\text{CDCl}_3$ , 100 MHz, some C could not be observed)  $\delta$  = 171.9, 155.4, 135.6, 128.5, 128.3, 128.2, 127.8, 127.2, 127.1, 114.1 (t,  $J$  = 288.5 Hz), 81.2, 67.4, 66.8, 40.3, 28.0, 27.1, 22.5 (t,  $J$  = 9.0 Hz);  $^{19}\text{F}$  NMR ( $\text{CDCl}_3$ , 377 MHz, rotamers)  $\delta$  = –137.72 – –142.47 (m); HRMS  $m/z$  (ES) Found:  $\text{MNa}^+$  480.1958.  $\text{C}_{26}\text{H}_{29}\text{F}_2\text{NO}_4\text{Na}$  requires  $\text{MNa}^+$  480.1957; LRMS  $m/z$  (ES) 358 (100%), 359 (80%), 477 (25%), 480 (85%,  $\text{MNa}^+$ ). Resolution between the enantiomers of carbamate **10** was achieved using a Agilent system fitted with a CHIRAL ART Cellulose-SC column (250 mm  $\times$  4.60 mm i.d.) as the stationary phase with a mixture of *n*-hexane:isopropanol (99:1 v/v) as the mobile phase at a flow rate of 1  $\text{mL}\cdot\text{min}^{-1}$ ; ambient temperature, detection by UV absorbance at 210 nm. Injection volume was 5  $\mu\text{L}$  of the sample prepared in a 2  $\text{g}\cdot\text{L}^{-1}$  solution of the eluent. Under these conditions, the components were eluted at 21.8 min and 27.1 min.

( $\pm$ )-*tert*-Butyl 1,1-Difluoro-5-methyl-5-phenyl-6-azaspiro[2.5]octane-6-carboxylate **11**

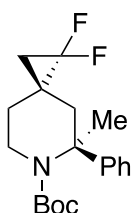

Using general procedure B, *n*-BuLi (0.15 mL, 0.37 mmol, 2.4 M in hexanes) and spiroperidine **2a** (100 mg, 0.31 mmol) in THF (1.3 mL) at –40 °C and MeI (0.07 mL, 1 mmol) gave, after purification by column chromatography on silica gel, eluting with pentane–EtOAc (9:1), the carbamate **11** (87 mg, 83%) as an oil;  $R_f$  0.43 [petrol–EtOAc (4:1)]; FT-IR  $\nu_{\max}$  (film)/ $\text{cm}^{-1}$  1682;  $^1\text{H}$  NMR ( $\text{CDCl}_3$ , 400 MHz)  $\delta$  = 7.33–7.24 (m, 4H), 7.22–7.14 (m, 1H), 3.99–3.74 (m, 2H), 2.21–2.07 (m, 2H), 1.81–1.68 (m, 4H), 1.64–1.57 (m, 1H), 1.14–0.87 (m, 11H);  $^{13}\text{C}$  NMR ( $\text{CDCl}_3$ , 100 MHz, one C could not be observed) 155.5, 149.2, 128.1, 126.0, 124.4, 114.8 (t,  $J$  = 288.5 Hz), 79.8, 59.6, 43.6 (d,  $J$  = 3.0 Hz), 40.2, 28.0, 27.9 (d,  $J$  = 4.5 Hz), 23.6, 23.2 (t,  $J$  = 10.0 Hz);  $^{19}\text{F}$  NMR ( $\text{CDCl}_3$ , 377 MHz)  $\delta$  = –137.05 (dd,  $J$  = 152.5, 12.5 Hz), –137.93 – –139.07 (m); HRMS  $m/z$  (ES) Found:  $\text{MNa}^+$  360.1756.  $\text{C}_{19}\text{H}_{25}\text{F}_2\text{NO}_2\text{Na}$  requires  $\text{MNa}^+$  360.1746; LRMS  $m/z$  (ES) 238 (20%), 282 (100%), 360 (35%,  $\text{MNa}^+$ ).

(±)-6-*tert*-Butyl 5-(Tributylstannyl)-1,1-difluoro-5-phenyl-6-azaspiro[2.5]octane-5,6-dicarboxylate **12**

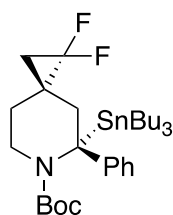

Using general procedure B, *n*-BuLi (0.15 mL, 0.37 mmol, 2.4 M in hexanes) and spiropiperidine **2a** (100 mg, 0.31 mmol) in THF (1.3 mL) at  $-40$  °C and Bu<sub>3</sub>SnCl (0.10 mL, 0.37 mmol) gave, after purification by column chromatography on a mixture of silica gel and K<sub>2</sub>CO<sub>3</sub> (10% w/w), eluting with pentane–EtOAc (97:3), the carbamate **12** (122 mg, 64%) as an oil; *R*<sub>f</sub> 0.73 [petrol–EtOAc (9:1)]; FT-IR  $\nu_{\max}$  (film)/cm<sup>-1</sup> 1668; <sup>1</sup>H NMR (CDCl<sub>3</sub>, 400 MHz, rotamers)  $\delta$  = 7.34–7.21 (m, 2H), 7.09–6.98 (m, 1H), 6.94 (d, *J* = 7.8 Hz, 2H), 4.20–4.08 (m, 0.4H), 4.01 (dt, *J* = 13.0, 4.0 Hz, 0.6H), 3.05 (td, *J* = 13.0, 3.0 Hz, 0.4H), 2.97 (td, *J* = 13.0, 3.0 Hz, 0.6H), 2.61–2.26 (m, 2H), 1.92 (td, *J* = 13.0, 4.0 Hz, 0.4H), 1.83–1.72 (m, 0.6H), 1.63–1.45 (m, 10H), 1.42–0.98 (m, 14H), 0.85 (t, *J* = 7.0 Hz, 9H), 0.80–0.59 (m, 6H); <sup>13</sup>C NMR (CDCl<sub>3</sub>, 100 MHz, rotamers, some C could not be observed)  $\delta$  = 157.3, 157.2, 144.2, 143.7, 128.4, 128.1, 124.0, 123.8, 123.7, 115.6 (t, *J* = 288.0 Hz), 115.1 (t, *J* = 288.0 Hz), 80.4, 80.2, 57.6, 40.7, 39.2, 35.5, 33.9, 29.0, 28.4, 27.7, 22.9 (t, *J* = 10.0 Hz), 22.1 (t, *J* = 10.0 Hz), 13.7, 13.5, 13.4; <sup>19</sup>F NMR (CDCl<sub>3</sub>, 377 MHz, rotamers)  $\delta$  =  $-129.8$  –  $-143.2$  (m); HRMS *m/z* (ES-TOF) Found: MH<sup>+</sup> 614.2834. C<sub>30</sub>H<sub>50</sub>F<sub>2</sub>NO<sub>2</sub>Sn requires MH<sup>+</sup> 614.2826; LRMS *m/z* (ES) 222 (20%), 556 (100%), 614 (5%, MNa<sup>+</sup>).

(±)-6-(*tert*-Butyl) 5-Methyl 5-(4-Chlorophenyl)-6-azaspiro[2.5]octane-5,6-dicarboxylate **13**

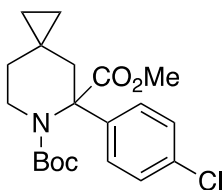

Using general procedure B, *n*-BuLi (0.16 mL, 0.4 mmol, 2.4 M in hexanes) and spiropiperidine **5** (108 mg, 0.34 mmol) in THF (1.5 mL) at  $-78$  °C and MeOCOC(=O)Cl (0.14 mL, 1.7 mmol) gave, after purification by column chromatography on silica gel, eluting with hexane–EtOAc (9:1), the carbamate **13** (110 mg, 60%) as an oil; *R*<sub>f</sub> 0.7 [hexane–EtOAc (4:1)]; FT-IR  $\nu_{\max}$  (film)/cm<sup>-1</sup> 2977, 2929, 2874, 1741, 1693, 1492, 1365, 1157, 1011, 775; <sup>1</sup>H NMR (CDCl<sub>3</sub>, 400 MHz)  $\delta$  = 7.34–7.27 (m, 4H), 3.95–3.92 (m, 1H), 3.76 (s, 3H), 3.61 (br, 1H), 2.38 (d, 1H, *J* = 12 Hz), 1.86 (d, 1H, *J* = 12 Hz), 1.79–1.73 (m, 1H),

1.39 (br, 1H), 1.29 (s, 9H), 0.32–0.24 (m, 2H), 0.13–0.08 (m, 1H), –0.01– –0.06 (m, 1H);  $^{13}\text{C}$  NMR ( $\text{CDCl}_3$ , 100 MHz, one C could not be observed)  $\delta$  = 172.9, 156.1, 132.4, 128.4, 127.6, 80.8, 67.7, 52.3, 45.9, 42.3, 33.2, 28.0, 13.6, 12.5, 11.4; HRMS  $m/z$  (ES) Found:  $\text{MH}^+$ –Boc 280.1104.  $\text{C}_{15}\text{H}_{19}^{35}\text{ClNO}_4$  requires  $\text{MH}^+$  – Boc 280.1104. Resolution between the enantiomers of carbamate **13** was achieved using a Beckman system fitted with a Lux Amylose–2 column (250 mm x 4.6 mm i.d.) as the stationary phase with a mixture of n-hexane–isopropanol (90:10 v/v) as the mobile phase at a flow rate of 1.0 mL/min; room temperature, detection by UV absorbance at 254 nm. Injection volume 20  $\mu\text{L}$  of the sample prepared in a 20 mg in 1 mL of the eluent. Under these conditions, the components were eluted at 16.4 and 18.5 min.

( $\pm$ )-8-(*tert*-Butyl) 7-Methyl 7-(4-Chlorophenyl)-8-azaspiro[4.5]decane-7,8-dicarboxylate **14**

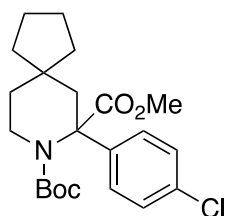

Using general procedure B, *n*-BuLi (0.21 mL, 0.51 mmol, 2.4 M in hexanes) and spiroperidine **5** (150 mg, 0.43 mmol) in THF (2 mL) at –78 °C and MeOCOC(=O)Cl (0.17 mL, 2.1 mmol) gave, after purification by column chromatography on silica gel, eluting with hexane–EtOAc (9:1), the carbamate **14** (111 mg, 64%) as an oil;  $R_f$  0.7 [hexane–EtOAc (4:1)]; FT-IR  $\nu_{\text{max}}$  (film)/ $\text{cm}^{-1}$  2949, 2874, 1740, 1701, 1365, 1217, 748;  $^1\text{H}$  NMR ( $\text{CDCl}_3$ , 400 MHz)  $\delta$  = 7.24–7.19 (m, 4H), 3.72–3.69 (m, 1H), 3.66 (s, 3H), 3.51 (br s, 1H), 2.26 (d, 1H,  $J$  = 12 Hz), 1.98 (d, 1H,  $J$  = 12 Hz), 1.56–1.49 (m, 1H), 1.47–1.42 (m, 3H), 1.39–1.33 (m, 4H), 1.21 (br s, 9H), 0.81–0.68 (m, 2H);  $^{13}\text{C}$  NMR ( $\text{CDCl}_3$ , 100 MHz, one C could not be observed)  $\delta$  = 173.3, 155.7, 132.5, 128.8, 127.5, 80.8, 66.8, 52.4, 40.3, 40.1, 39.8, 34.6, 28.4, 28.3, 28.0, 23.6, 22.3; HRMS  $m/z$  (ES) Found:  $\text{MH}^+$ –Boc 308.1422.  $\text{C}_{17}\text{H}_{23}^{35}\text{ClNO}_4$  requires  $\text{MH}^+$  – Boc 308.1417. Resolution between the enantiomers of carbamate **14** was achieved using a Beckman system fitted with a Lux Amylose–2 column (250 mm x 4.6 mm i.d.) as the stationary phase with a mixture of n-hexane–isopropanol (95:5 v/v) as the mobile phase at a flow rate of 0.8 mL/min; room temperature, detection by UV absorbance at 254 nm. Injection volume 20  $\mu\text{L}$  of the sample prepared in a 20 mg in 1 mL of the eluent. Under these conditions, the components were eluted at 7.8 and 14.2 min.

## 5. Kinetic resolution of racemic substrates 2a–f

*tert*-Butyl (3*S*,5*S*)-1,1-Difluoro-5-phenyl-6-azaspiro[2.5]octane-6-carboxylate (3*S*,5*S*)-**2a** and 6-(*tert*-Butyl) 5-Methyl (3*R*,5*R*)-1,1-Difluoro-5-phenyl-6-azaspiro[2.5]octane-5,6-dicarboxylate (3*R*,5*R*)-**9a**

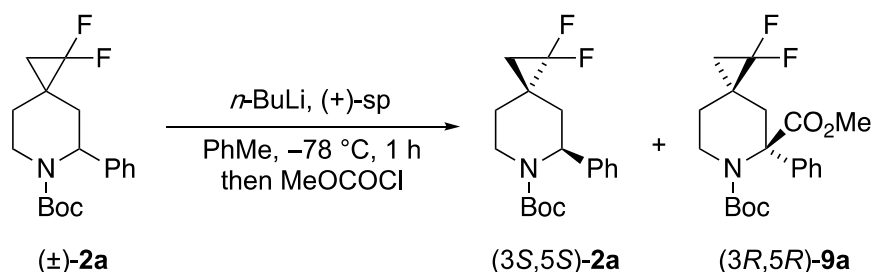

Reaction with 200 mg of spiropiperidine **2a**:

*n*-BuLi (0.22 mL, 0.50 mmol, 2.3 M in hexanes) was added to a mixture of (+)-sparteine (131 mg, 0.56 mmol) and the racemic spiropiperidine **2a** (200 mg, 0.62 mmol) in dry PhMe (2.5 mL) at  $-78\text{ }^\circ\text{C}$ . After 1 h, MeOCOCI (0.12 mL, 1.5 mmol) was added and the mixture was allowed to warm to room temperature over 16 h then MeOH (1 mL) was added. The solvent was evaporated, and the residue was purified by column chromatography on silica gel, eluting with petrol–EtOAc (93:7), to give recovered spiropiperidine (3*S*,5*S*)-**2a** (82 mg, 41%) as an oil; data as above; the enantiomeric ratio was determined to be 97:3 by CSP-HPLC as described above (major component eluted at 8.4 min);  $[\alpha]_{\text{D}}^{22} - 62$  (c 1.0,  $\text{CHCl}_3$ ). In addition, the carbamate (3*R*,5*R*)-**9a** (115 mg, 49%) was isolated as an oil, data as above; the enantiomeric ratio was determined to be 86:14 by CSP-HPLC (major component eluted at 11.5 min);  $[\alpha]_{\text{D}}^{22} + 20$  (c 1.0,  $\text{CHCl}_3$ ).

Reaction with 2 g of spiropiperidine **2a**:

*n*-BuLi (2.2 mL, 5.0 mmol, 2.3 M in hexanes) was added to a mixture of (+)-sparteine (1.3 g, 5.6 mmol) and the racemic spiropiperidine **2a** (2.0 g, 6.2 mmol) in dry PhMe (25 mL) at  $-78\text{ }^\circ\text{C}$ . After 1 h, MeOCOCI (1.2 mL, 16 mmol) was added and the mixture was allowed to warm to room temperature over 16 h then MeOH (10 mL) was added. The solvent was evaporated, and the residue was diluted with Et<sub>2</sub>O (200 mL) and water (100 mL). The aqueous layer was adjusted to pH 1 using aq HCl (2 M) and the organic layer was separated, dried ( $\text{MgSO}_4$ ), filtered and evaporated. Purification by column chromatography on silica gel, eluting with petrol–EtOAc (94:6), gave recovered spiropiperidine (3*S*,5*S*)-

**2a** (0.65 g, 33%) as a clear oil; data as above; the enantiomeric ratio was determined to be 99:1 by CSP-HPLC as described above (major component eluted at 8.4 min);  $[\alpha]_D^{20} -70$  (*c* 1.0, CHCl<sub>3</sub>). In addition, the carbamate (3*R*,5*R*)-**9a** (1.4 g, 58%) was isolated as a white amorphous solid; mp 100–102 °C (petrol–EtOAc); remaining data as above; the enantiomeric ratio was determined to be 75:25 by CSP-HPLC (major component eluted at 11.1 min);  $[\alpha]_D^{20} +12$  (*c* 1.0, CHCl<sub>3</sub>). Note: The aqueous layer from the extraction was adjusted to pH 14 using NaOH pellets and Et<sub>2</sub>O (200 mL) was added. The organic layer was separated, dried (MgSO<sub>4</sub>), filtered and the solvent was evaporated to give crude recovered (+)-sparteine. Purification by short path distillation gave recovered (+)-sparteine (1.1 g, 85%) as an oil.

*tert*-Butyl (3*S*,5*S*)-5-(4-Fluorophenyl)-1,1-difluoro-6-azaspiro[2.5]octane-6-carboxylate (3*S*,5*S*)-**2b** and 6-(*tert*-Butyl) 5-Methyl (3*R*,5*R*)-5-(4-fluorophenyl)-1,1-difluoro-6-azaspiro[2.5]octane-5,6-dicarboxylate (3*R*,5*R*)-**9b**

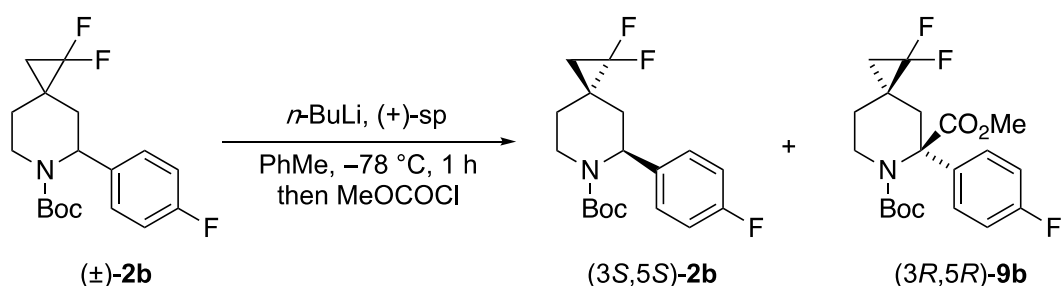

*n*-BuLi (0.22 mL, 0.50 mmol, 2.3 M in hexanes) was added to a mixture of (+)-sparteine (131 mg, 0.56 mmol) and the racemic spiro[2.5]octane **2b** (211 mg, 0.62 mmol) in dry PhMe (2.5 mL) at  $-78\text{ }^\circ\text{C}$ . After 1 h, MeOCOCI (0.12 mL, 1.5 mmol) was added and the mixture was allowed to warm to room temperature over 16 h then MeOH (1 mL) was added. The solvent was evaporated, and the residue was purified by column chromatography on silica gel, eluting with petrol–EtOAc (94:6), to give recovered spiro[2.5]octane (3*S*,5*S*)-**2b** (90 mg, 41%) as an oil; data as above; the enantiomeric ratio was determined to be 99:1 by CSP-HPLC as described above (major component eluted at 9.2 min);  $[\alpha]_D^{20} -53$  (*c* 1.0, CHCl<sub>3</sub>). In addition, the carbamate (3*R*,5*R*)-**9b** (141 mg, 57%) was isolated as an oil, data as above; the enantiomeric ratio was determined to be 76:24 by CSP-HPLC (major component eluted at 9.0 min);  $[\alpha]_D^{20} +13$  (*c* 1.0, CHCl<sub>3</sub>).



*tert*-Butyl (3*S*,5*S*)-5-(4-Chlorophenyl)-1,1-difluoro-6-azaspiro[2.5]octane-6-carboxylate (3*S*,5*S*)-**2c** and 6-(*tert*-Butyl) 5-Methyl (3*R*,5*R*)-5-(4-Chlorophenyl)-1,1-difluoro-6-azaspiro[2.5]octane-5,6-dicarboxylate (3*R*,5*R*)-**9c**

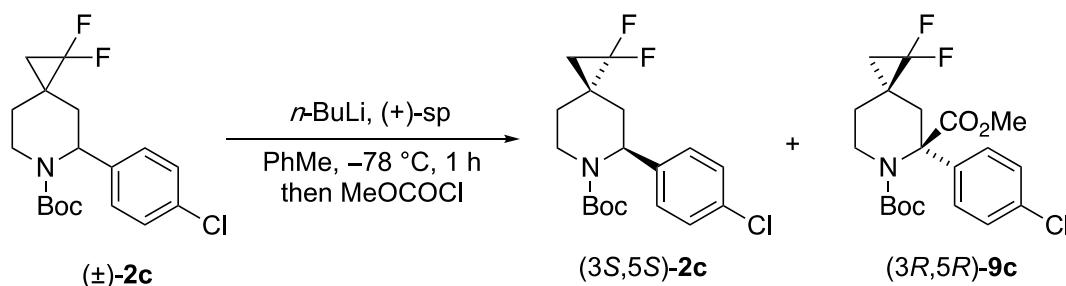

Reaction with 200 mg of spiro piperidine **2c**:

*n*-BuLi (0.28 mL, 0.62 mmol, 2.2 M in hexanes) was added to a mixture of (+)-sparteine (159 mg, 0.68 mmol) and the racemic spiro piperidine **2c** (221 mg, 0.62 mmol) in dry PhMe (5 mL) at  $-78\text{ }^\circ\text{C}$ . After 1 h, MeOCOCi (0.12 mL, 1.5 mmol) was added and the mixture was allowed to warm to room temperature over 16 h then MeOH (1 mL) was added. The solvent was evaporated, and the residue was purified by column chromatography on silica gel, eluting with petrol–EtOAc (92:8), to give recovered spiro piperidine (3*S*,5*S*)-**2c** (90 mg, 41%) as an oil; data as above; the enantiomeric ratio was determined to be 94:6 by CSP-HPLC as described above (major component eluted at 8.5 min);  $[\alpha]_{\text{D}}^{18} - 57$  (*c* 1.0,  $\text{CHCl}_3$ ). In addition, the carbamate (3*R*,5*R*)-**9c** (138 mg, 54%) was isolated as a clear oil, data as above; the enantiomeric ratio was determined to be 79:21 by CSP-HPLC (major component eluted at 9.7 min);  $[\alpha]_{\text{D}}^{18} + 11$  (*c* 1.0,  $\text{CHCl}_3$ ).

Reaction with 1 g of spiro piperidine **2c**:

*n*-BuLi (1.0 mL, 2.2 mmol, 2.2 M in hexanes) was added to a mixture of recovered (+)-sparteine (590 mg, 2.52 mmol) and the racemic spiro piperidine **2c** (1.0 g, 2.8 mmol) in dry PhMe (12 mL) at  $-78\text{ }^\circ\text{C}$ . After 1 h, MeOCOCi (0.54 mL, 7.0 mmol) was added and the mixture was allowed to warm to room temperature over 16 h then MeOH (5 mL) was added. The solvent was evaporated, and the residue was diluted with Et<sub>2</sub>O (150 mL) and water (100 mL). The aqueous layer was adjusted to pH 1 using aq HCl (2 M) and the organic layer was separated, dried ( $\text{MgSO}_4$ ), filtered and evaporated. Purification by column chromatography on silica gel, eluting with petrol–EtOAc (94:6), gave recovered spiro piperidine (3*S*,5*S*)-**2c** (0.25 g, 25%) as an oil; data as above; the enantiomeric ratio was

determined to be 99:1 by CSP-HPLC as described above (major component eluted at 8.4 min);  $[\alpha]_{\text{D}}^{20} - 72$  (c 1.0,  $\text{CHCl}_3$ ). In addition, the carbamate (3*R*,5*R*)-**9c** (0.83 g, 72%) was isolated as a white amorphous solid; mp 108–110 °C (petrol–EtOAc); remaining data as above; the enantiomeric ratio was determined to be 66:34 by CSP-HPLC (major component eluted at 9.5 min);  $[\alpha]_{\text{D}}^{20} +6$  (c 1.0,  $\text{CHCl}_3$ ). Note: The aqueous layer from the extraction was adjusted to pH 14 using NaOH pellets and  $\text{Et}_2\text{O}$  (150 mL) was added. The organic layer was separated, dried over anhydrous  $\text{MgSO}_4$ , filtered and the solvent was evaporated to give crude recovered (+)-sparteine (0.53 g) as an oil.

*tert*-Butyl (3*S*,5*S*)-5-(4-Methoxyphenyl)-1,1-difluoro-6-azaspiro[2.5]octane-6-carboxylate (3*S*,5*S*)-**2d** and 6-(*tert*-Butyl) 5-Methyl (3*R*,5*R*)-5-(4-Methoxyphenyl)-1,1-difluoro-6-azaspiro[2.5]octane-5,6-dicarboxylate (3*R*,5*R*)-**9d**

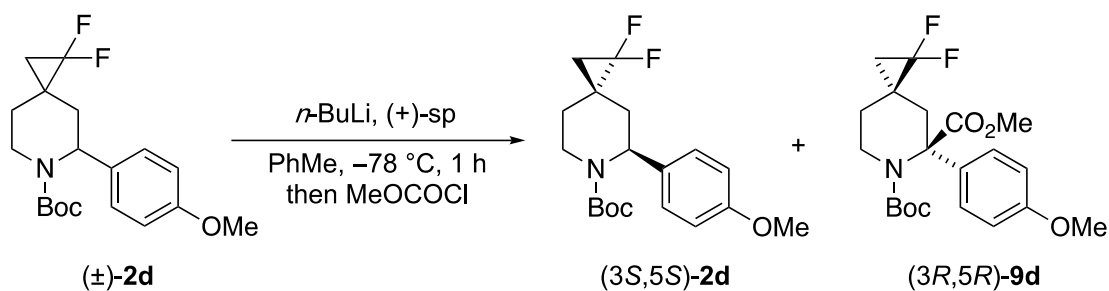

*n*-BuLi (0.20 mL, 0.93 mmol, 2.3 M in hexanes) was added to a mixture of (+)-sparteine (232 mg, 0.989 mmol) and the racemic spiro[2.5]octane **2d** (218 mg, 0.62 mmol) in dry PhMe (5 mL) at  $-78\text{ }^\circ\text{C}$ . After 1 h, MeOCOCI (0.12 mL, 1.5 mmol) was added and the mixture was allowed to warm to room temperature over 16 h then MeOH (1 mL) was added. The solvent was evaporated, and the residue was purified by column chromatography on silica gel, eluting with petrol–EtOAc (92:8), to give recovered spiro[2.5]octane (3*S*,5*S*)-**2d** (41 mg, 19%) as an oil; data as above; the enantiomeric ratio was determined to be 90:10 by CSP-HPLC as described above (major component eluted at 13.2 min);  $[\alpha]_{\text{D}}^{20} - 51$  (c 1.0,  $\text{CHCl}_3$ ). In addition, the carbamate (3*R*,5*R*)-**9d** (183 mg, 72%) was isolated as an oil, data as above; the enantiomeric ratio was determined to be 62:38 by CSP-HPLC (major component eluted at 10.3 min);  $[\alpha]_{\text{D}}^{20} +10$  (c 1.0,  $\text{CHCl}_3$ ).

*tert*-Butyl (3*S*,5*S*)-5-(4-Methylphenyl)-1,1-difluoro-6-azaspiro[2.5]octane-6-carboxylate (3*S*,5*S*)-**2e** and 6-(*tert*-Butyl) 5-Methyl (3*R*,5*R*)-5-(4-Methylphenyl)-1,1-difluoro-6-azaspiro[2.5]octane-5,6-dicarboxylate (3*R*,5*R*)-**9e**

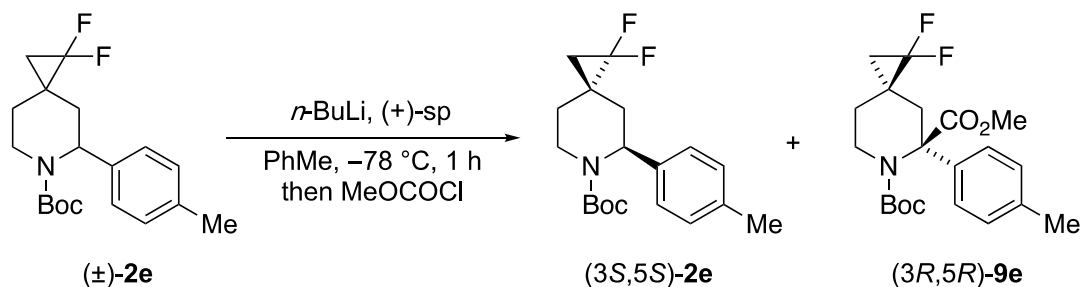

*n*-BuLi (0.28 mL, 0.61 mmol, 2.2 M in hexanes) was added to a mixture of (+)-sparteine (157 mg, 0.67 mmol) and the racemic spiro[2.5]octane **2e** (206 mg, 0.61 mmol) in dry PhMe (5 mL) at  $-78\text{ }^\circ\text{C}$ . After 1 h, MeOCOCi (0.12 mL, 1.5 mmol) was added and the mixture was allowed to warm to room temperature over 16 h then MeOH (1 mL) was added. The solvent was evaporated, and the residue was purified by column chromatography on silica gel, eluting with petrol–EtOAc (92:8), to give recovered spiro[2.5]octane (3*S*,5*S*)-**2e** (88 mg, 43%) as an oil; data as above; the enantiomeric ratio was determined to be 92:8 by CSP-HPLC as described above (major component eluted at 8.9 min);  $[\alpha]_{\text{D}}^{18} -60$  (*c* 1.0,  $\text{CHCl}_3$ ). In addition, the carbamate (3*R*,5*R*)-**9e** (114 mg, 47%) was isolated as an oil, data as above; the enantiomeric ratio was determined to be 84:16 by CSP-HPLC (major component eluted at 10.5 min);  $[\alpha]_{\text{D}}^{18} +22$  (*c* 1.0,  $\text{CHCl}_3$ ).

*tert*-Butyl (3*S*,5*S*)-1,1-Difluoro-5-(3-(trifluoromethyl)phenyl)-6-azaspiro[2.5]octane-6-carboxylate (3*S*,5*S*)-**2f** and 6-(*tert*-Butyl) 5-Methyl (3*R*,5*R*)-1,1-Difluoro-5-(3-(trifluoromethyl)phenyl)-6-azaspiro[2.5]octane-5,6-dicarboxylate (3*R*,5*R*)-**9f**

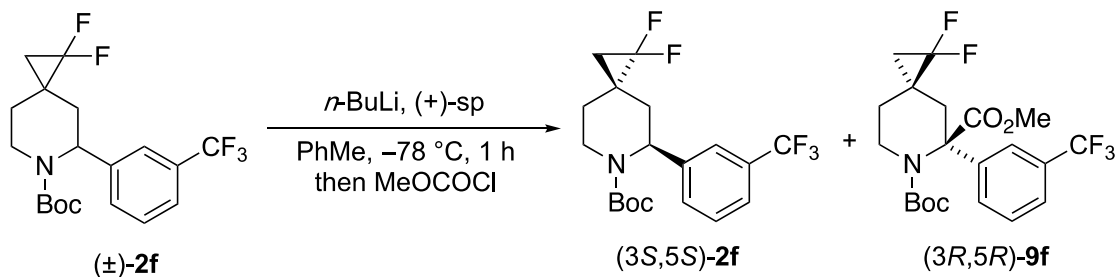

*n*-BuLi (0.20 mL, 0.44 mmol, 2.2 M in hexanes) was added to a mixture of (+)-sparteine (116 mg, 0.49 mmol) and the racemic spiro piperidine **2f** (215 mg, 0.55 mmol) in dry PhMe (2.2 mL) at  $-78$  °C. After 1 h, MeOCOCI (0.11 mL, 1.4 mmol) was added and the mixture was allowed to warm to room temperature over 16 h then MeOH (1 mL) was added. The solvent was evaporated, and the residue was purified by column chromatography on silica gel, eluting with petrol–EtOAc (93:7), to give recovered spiro piperidine (3*S*,5*S*)-**2f** (73 mg, 34%) as an oil; data as above; the enantiomeric ratio was determined to be 88:12 by CSP-HPLC as described above (major component eluted at 5.9 min);  $[\alpha]_{\text{D}}^{20} -41$  (*c* 1.0, CHCl<sub>3</sub>). In addition, the carbamate (3*R*,5*R*)-**9f** (146 mg, 59%) was isolated as an oil, data as above; the enantiomeric ratio was determined to be 72:28 by CSP-HPLC (major component eluted at 6.6 min);  $[\alpha]_{\text{D}}^{20} +8$  (*c* 1.0, CHCl<sub>3</sub>).

*tert*-Butyl (5*S*)-5-(4-Chlorophenyl)-6-azaspiro[2.5]octane-6-carboxylate (*S*)-**5** and 6-(*tert*-Butyl) 5-Methyl (5*R*)-5-(4-Chlorophenyl)-6-azaspiro[2.5]octane-5,6-dicarboxylate (*R*)-**13**

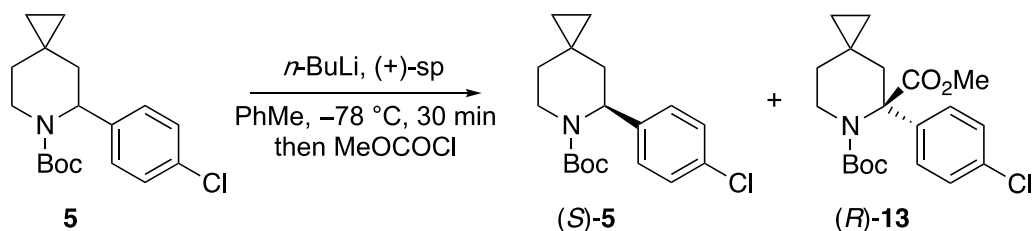

*n*-BuLi (0.15 mL, 0.37 mmol, 2.4 M in hexanes) was added to a mixture of (+)-sparteine (118 mg, 0.50 mmol) and the racemic spiro piperidine **5** (200 mg, 0.62 mmol) in dry PhMe (7.5 mL) at  $-78$  °C. After 0.5 h, MeOCOCI (0.24 mL, 3.1 mmol) was added and the mixture was allowed to warm to room temperature. After 1 h, MeOH (2 mL) was added. The solvent was evaporated and the residue was purified by column chromatography on silica gel, eluting with *n*-hexane–EtOAc (90:10), to give recovered spiro piperidine (*S*)-**5** (88 mg, 44%) as an oil; data as above; the enantiomeric ratio was determined to be 92:8 by CSP-HPLC as described above (major component eluted at 19.9 min);  $[\alpha]_{\text{D}}^{20} -34$  (*c* 1.0, CHCl<sub>3</sub>). In addition, the carbamate (*R*)-**13** (99 mg, 42%) was isolated as an oil, data as above; the enantiomeric ratio was determined to be 90:10 by CSP-HPLC (major component eluted at 16.3 min);  $[\alpha]_{\text{D}}^{20} +42$  (*c* 1.0, CHCl<sub>3</sub>).

*tert*-Butyl (7*S*)-7-(4-Chlorophenyl)-8-azaspiro[4.5]decane-8-carboxylate (*S*)-**8** and (7*R*)-8-(*tert*-Butyl) 7-Methyl 7-(4-Chlorophenyl)-8-azaspiro[4.5]decane-7,8-dicarboxylate (*R*)-**14**

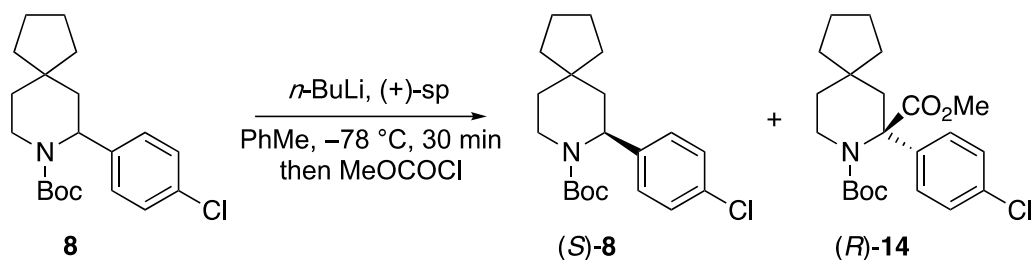

*n*-BuLi (0.14 mL, 0.34 mmol, 2.4 M in hexanes) was added to a mixture of (+)-sparteine (108 mg, 0.46 mmol) and the racemic spiropiperidine **8** (200 mg, 0.57 mmol) in dry PhMe (6.8 mL) at  $-78\text{ }^{\circ}\text{C}$ . After 0.5 h, MeOCOCl (0.22 mL, 2.85 mmol) was added and the mixture was allowed to warm to room temperature. After 1 h, MeOH (2 mL) was added. The solvent was evaporated and the residue was purified by column chromatography on silica gel, eluting with *n*-hexane–EtOAc (90:10), to give recovered spiropiperidine (*S*)-**8** (90 mg, 45%) as an oil; data as above; er 97:3 by CSP-HPLC as described above (major component eluted at 7.7 min);  $[\alpha]_{\text{D}}^{20} -40$  (c 1.0,  $\text{CHCl}_3$ ). In addition, the carbamate (*R*)-**14** (88 mg, 38%) was isolated as an oil, data as above; er 96:4 by CSP-HPLC (major component eluted at 8.0 min);  $[\alpha]_{\text{D}}^{20} +62$  (c 1.0,  $\text{CHCl}_3$ ).

## 6. Further functionalisation of enantioenriched compounds

6-*tert*-Butyl 5-Benzyl (3*S*,5*S*)-1,1-Difluoro-5-phenyl-6-azaspiro[2.5]octane-5,6-dicarboxylate (3*S*,5*S*)-

**10**

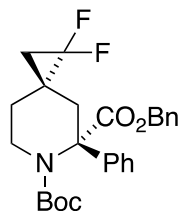

Using general procedure B (page S-4), *n*-BuLi (0.73 mL, 1.7 mmol, 2.3 M in hexanes) and (3*S*,5*S*)-**2a** (0.45 g, 1.4 mmol, er 99:1) in THF (5.6 mL) at  $-78\text{ }^{\circ}\text{C}$  and BnOCOCi (0.30 mL, 2.1 mmol) gave, after purification by column chromatography on silica gel, eluting with hexane–EtOAc (94:6), the carbamate (3*S*,5*S*)-**10** (0.46 g, 72%) as an oil; data as above; the enantiomeric ratio was determined to be 99:1 by CSP-HPLC (major component eluted at 21.2 min);  $[\alpha]_{\text{D}}^{20} -11$  (*c* 1.0,  $\text{CHCl}_3$ ).

6-(*tert*-Butyl) 5-Methyl (3*S*,5*S*)-5-(4-Chlorophenyl)-1,1-difluoro-6-azaspiro[2.5]octane-5,6-dicarboxylate (3*S*,5*S*)-**9c**

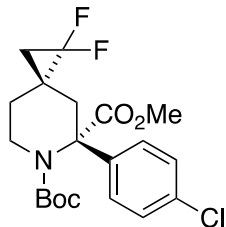

Using general procedure B (page S-4), *n*-BuLi (0.18 mL, 0.41 mmol, 2.2 M in hexanes) and (3*S*,5*S*)-**2c** (121 mg, 0.338 mmol, er 99:1) in THF (1.4 mL) at  $-78\text{ }^{\circ}\text{C}$  and MeOCOCi (0.1 mL, 1.2 mmol) gave, after purification by column chromatography on silica gel, eluting with hexane–EtOAc (94:6), the carbamate (3*S*,5*S*)-**9c** (110 mg, 78%) as a white amorphous solid; m.p. 145–147  $^{\circ}\text{C}$  ( $\text{Et}_2\text{O}$ ); remaining data as above; the enantiomeric ratio was determined to be 99:1 by CSP-HPLC (major component eluted at 12.5 min);  $[\alpha]_{\text{D}}^{20} -20$  (*c* 0.5,  $\text{CHCl}_3$ ).

Benzyl (3*S*,5*S*)-1,1-Difluoro-5-phenyl-6-azaspiro[2.5]octane-5-carboxylate hydrochloride (3*S*,5*S*)-**15**

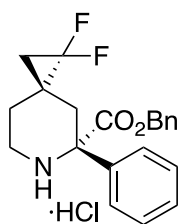

HCl (0.82 mL, 3.3 mmol, 4 M in dioxane) was added to carbamate (3*S*,5*S*)-**10** (150 mg, 0.328 mmol, er 99:1) in CH<sub>2</sub>Cl<sub>2</sub> (3.3 mL) at 0 °C then the mixture was warmed to room temperature. After 16 h, the solvent was evaporated and the oily residue and was suspended in Et<sub>2</sub>O (15 mL). The solvent was evaporated to give hydrochloride salt (3*S*,5*S*)-**15** (125 mg, 97%) as an amorphous off-white solid; m.p. 102–104 °C (Et<sub>2</sub>O); R<sub>f</sub> 0.15 [petrol–EtOAc (4:1)]; FT-IR ν<sub>max</sub> (film)/cm<sup>-1</sup> 1742; <sup>1</sup>H NMR (DMSO-d<sub>6</sub>, 400 MHz) δ = 10.55 (br s, 2H), 7.69–7.58 (m, 2H), 7.54–7.45 (m, 3H), 7.32–7.23 (m, 3H), 7.13–7.03 (m, 2H), 5.30 (d, *J* = 12.5 Hz, 1H), 5.04 (d, *J* = 12.5 Hz, 1H), 3.52–3.29 (m, 2H), 2.89–2.68 (m, 2H), 2.20–2.00 (m, 1H), 1.80 (d, *J* = 14.5 Hz, 1H), 1.63–1.46 (m, 2H); <sup>13</sup>C NMR (DMSO-d<sub>6</sub>, 100 MHz, some C could not be observed) δ = 135.0, 130.2, 129.6, 128.8, 128.75, 128.1, 126.7, 69.7, 68.3, 65.5, 42.1, 32.4, 24.6, 21.8 (t, *J* = 10.0 Hz); <sup>19</sup>F NMR (DMSO-d<sub>6</sub>, 377 MHz) δ = –135.6 (d, *J* = 152.0 Hz), –138.2 (d, *J* = 152.0 Hz); HRMS *m/z* (ES) Found: MH<sup>+</sup> 358.1615. C<sub>21</sub>H<sub>22</sub>F<sub>2</sub>NO<sub>2</sub>Na requires MH<sup>+</sup> 358.1613; LRMS *m/z* (ES) 358 (100%, MNa<sup>+</sup>); [α]<sub>D</sub><sup>20</sup> +72 (*c* 0.5, MeOH).

(3*S*,5*S*)-6-(*tert*-Butoxycarbonyl)-1,1-difluoro-5-phenyl-6-azaspiro[2.5]octane-5-carboxylic acid (3*S*,5*S*)-**16**

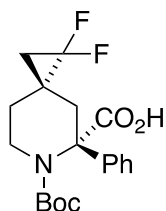

To a solution of carbamate (3*S*,5*S*)-**10** (158 mg, 0.34 mmol) in MeOH (12 mL) was added 10% wt Pd/C (100 mg, 0.086 mmol). The mixture was stirred at room temperature under a hydrogen gas atmosphere (1 atm) for 16 h. The mixture was filtered and the solvent was removed under reduced pressure to give carboxylic acid (3*S*,5*S*)-**16** (113 mg, 89% yield) as a white amorphous solid; mp >250 °C (MeOH); R<sub>f</sub> 0.01 [petrol–EtOAc (4:1)]; FT-IR ν<sub>max</sub> (film)/cm<sup>-1</sup> 1742, 1637; <sup>1</sup>H NMR (DMSO-d<sub>6</sub>, 400 MHz) δ = 12.80

(br s, 1H), 7.47–7.16 (m, 5H), 3.98–3.76 (m, 1H), 3.53–3.26 (m, 2H), 2.39 (br d,  $J = 14.5$  Hz, 1H), 2.20 (br d,  $J = 14.5$  Hz, 1H), 2.08–1.79 (m, 1H), 1.36–0.66 (m, 11H);  $^{13}\text{C}$  NMR (DMSO- $d_6$ , 100 MHz, some C could not be observed)  $\delta = 173.2, 155.2, 127.8, 127.0, 115.5, 80.3, 66.8, 28.2, 26.7, 23.4\text{--}23.1$  (m),  $22.3\text{--}21.9$  (m);  $^{19}\text{F}$  NMR (DMSO- $d_6$ , 377 MHz, rotamers)  $\delta = -136.19 - -139.68$  (m); HRMS  $m/z$  (ES) Found:  $\text{MNa}^+$  390.1498.  $\text{C}_{19}\text{H}_{23}\text{F}_2\text{NO}_4\text{Na}$  requires  $\text{MNa}^+$  390.1487; LRMS  $m/z$  (ES) 196 (15%), 268 (100%), 390 (75%,  $\text{MNa}^+$ );  $[\alpha]_D^{20} -25$  ( $c$  1.0, MeOH).

## References

1. A. Choi, A. J. H. M. Meijer, I. Proietti Silvestri and I. Coldham, *J. Org. Chem.*, 2022, **87**, 8819.
2. Bruker (2017) Apex3 v2017.3-0. Bruker AXS Inc., Madison, Wisconsin, USA.
3. L. Krause, R. Herbst-Irmer, G. M. Sheldrick and D. Stalke, *J. Appl. Cryst.*, 2015, **48**, 3.
4. G. M. Sheldrick, *Acta Cryst.*, 2015, **A71**, 3.
5. G. M. Sheldrick, *Acta Cryst.*, 2015, **C71**, 3.
6. O.V. Dolomanov, L. J. Bourhis, R. J. Gildea, J. A. K. Howard and H. Puschmann, *J. Appl. Cryst.*, 2009, **42**, 339.
7. A. D. Becke, *J. Chem. Phys.*, 1993, **98**, 5648.
8. M. J. Frisch, G. W. Trucks, H. B. Schlegel, G. E. Scuseria, M. A. Robb, J. R. Cheeseman, G. Scalmani, V. Barone, B. Mennucci, G. A. Petersson, H. Nakatsuji, M. Caricato, X. Li, H. P. Hratchian, A. F. Izmaylov, J. Bloino, G. Zheng, J. L. Sonnenberg, M. Hada, M. Ehara, K. Toyota, R. Fukuda, J. Hasegawa, M. Ishida, T. Nakajima, Y. Honda, O. Kitao, H. Nakai, T. Vreven, J. A. Montgomery Jr, J. E. Peralta, F. Ogliaro, M. Bearpark, J. J. Heyd, E. Brothers, K. N. Kudin, V. N. Staroverov, R. Kobayashi, J. Normand, K. Raghavachari, A. Rendell, J. C. Burant, S. S. Iyengar, J. Tomasi, M. Cossi, N. Rega, J. M. Millam, M. Klene, J. E. Knox, J. B. Cross, V. Bakken, C. Adamo, J. Jaramillo, R. Gomperts, R. E. Stratmann, O. Yazyev, A. J. Austin, R. Cammi, C. Pomelli, J. W. Ochterski, R. L. Martin, K. Morokuma, V. G. Zakrzewski, G. A. Voth, P. Salvador, J. J. Dannenberg, S. Dapprich, A. D. Daniels, Ö. Farkas, J. B. Foresman, J. V. Ortiz, J. Cioslowski and D. J. Fox, Gaussian 09, Revision D.01, Gaussian, Inc., Wallingford CT, 2009.
9. S. Grimme, S. Ehrlich and L. Goerigk, *J. Comput. Chem.*, 2011, **32**, 1456.
10. F. Weigend and R. Ahlrichs, *Phys. Chem. Chem. Phys.*, 2005, **7**, 3297.



11. a) G. Scalmani and M. J. Frisch, *J. Chem. Phys.*, 2010, **132**, 114110; b) M. Cossi, N. Rega, G. Scalmani and V. Barone, *J. Comput. Chem.*, 2003, **24**, 669 and references therein.
12. E. B. Averina, K. N. Sedenkova, S. G. Bakhtin, Y. K. Grishin, A. G. Kutateladze, V. A. Roznyatovsky, V. B. Rybakov, G. M. Butov, T. S. Kuznetsova and N. S. Zefirov, *J. Org. Chem.*, 2014, **79**, 8163.
13. M.-H. Chen and J. A. Abraham, *Tetrahedron Lett.*, 1996, **37**, 5233.
14. W. Luo, Y. Fang, L. Zhang, T. Xu, Y. Liu, Y. Li, X. Jin, J. Bao, X. Wu and Z. Zhang, *Eur. J. Org. Chem.*, 2020, 1778.
15. C. J. O'Brien and D. A. Nicewicz, *Synlett*, 2021, **32**, 814.
16. L. C. Rovati, R. Artusi, F. Magaraci, B. Buzzi, WO 2021/191062, 2021.
17. J. Wang, S. D. Cady, V. Balannik, L. H. Pinto, W. F.; DeGrado, M. Hong, *J. Am. Chem. Soc.*, 2009, **131**, 8066.

7.  $^1\text{H}$ ,  $^{19}\text{F}$  and  $^{13}\text{C}$  NMR spectra (all in  $\text{CDCl}_3$  unless stated)

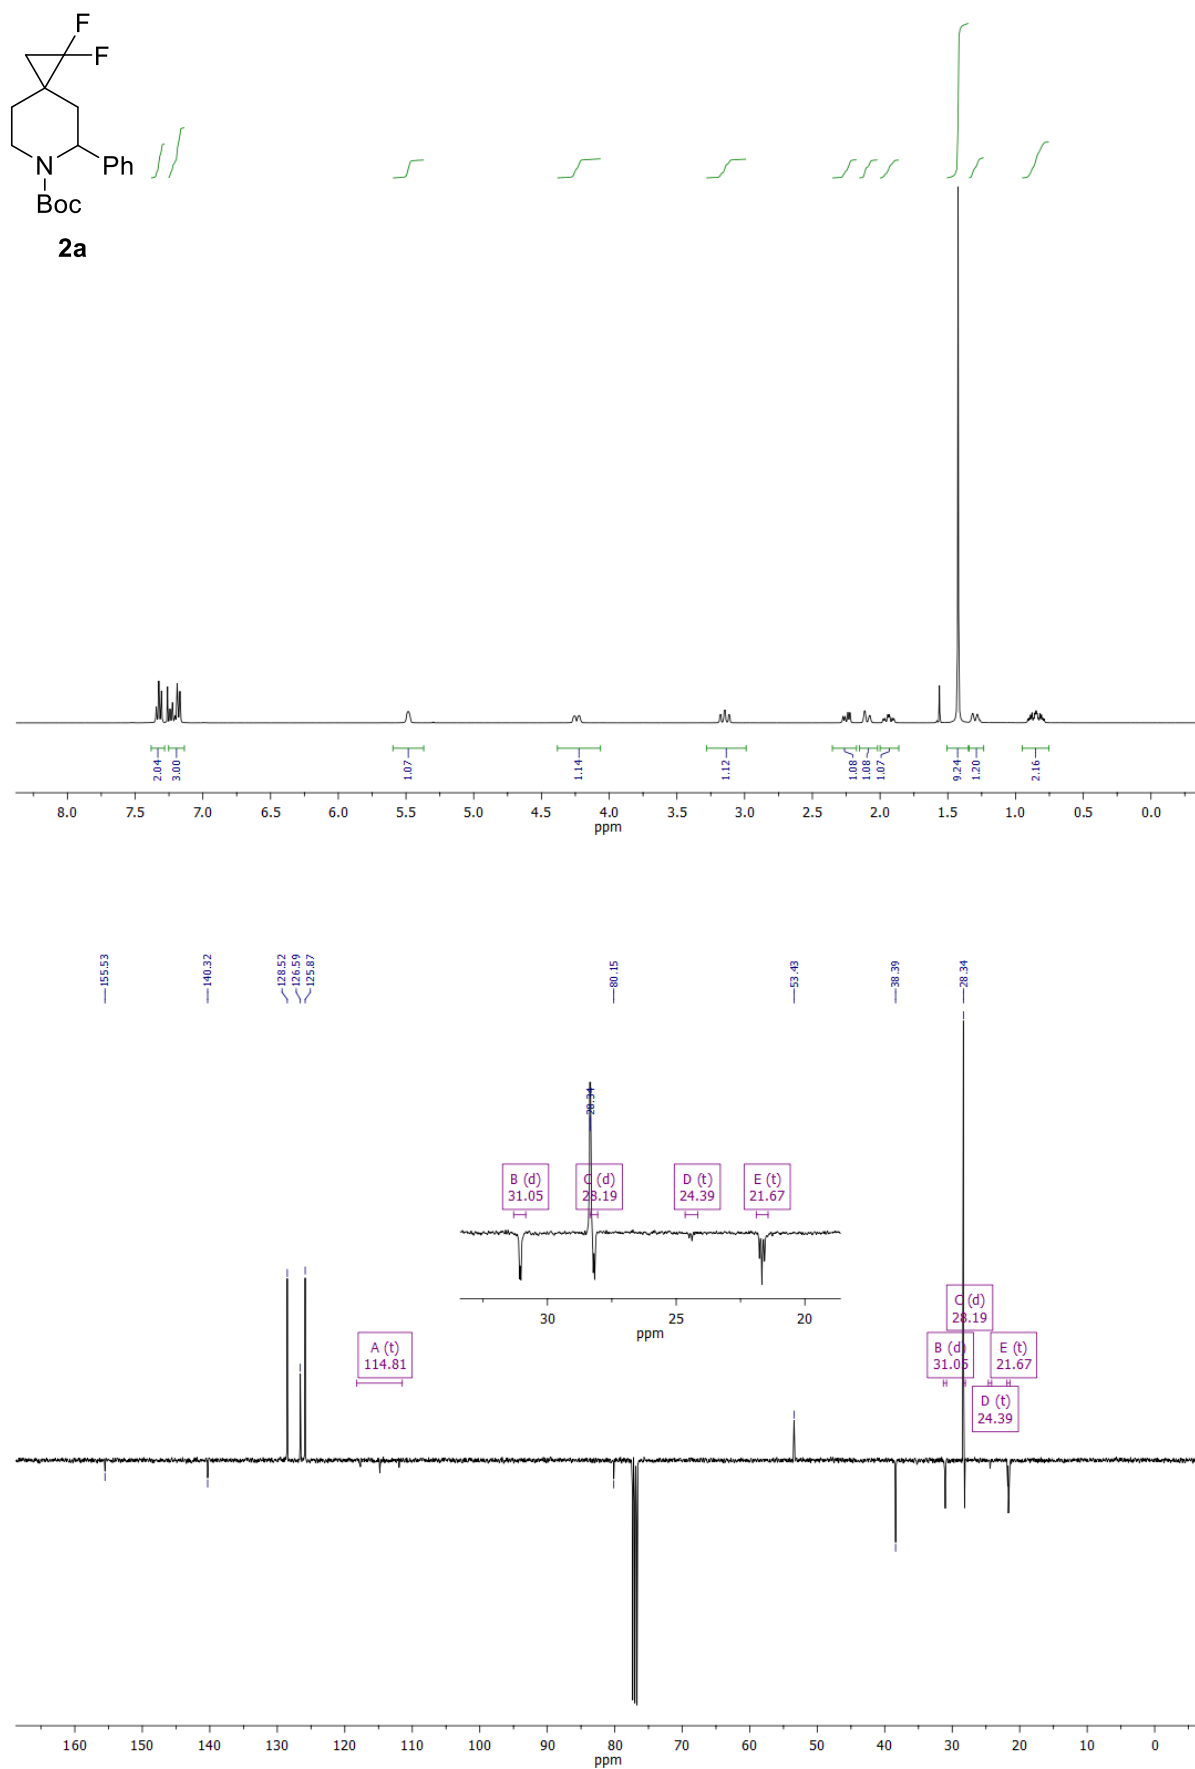

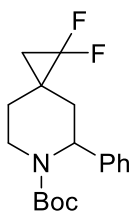

**2a** ( $^{19}\text{F}$ -NMR)

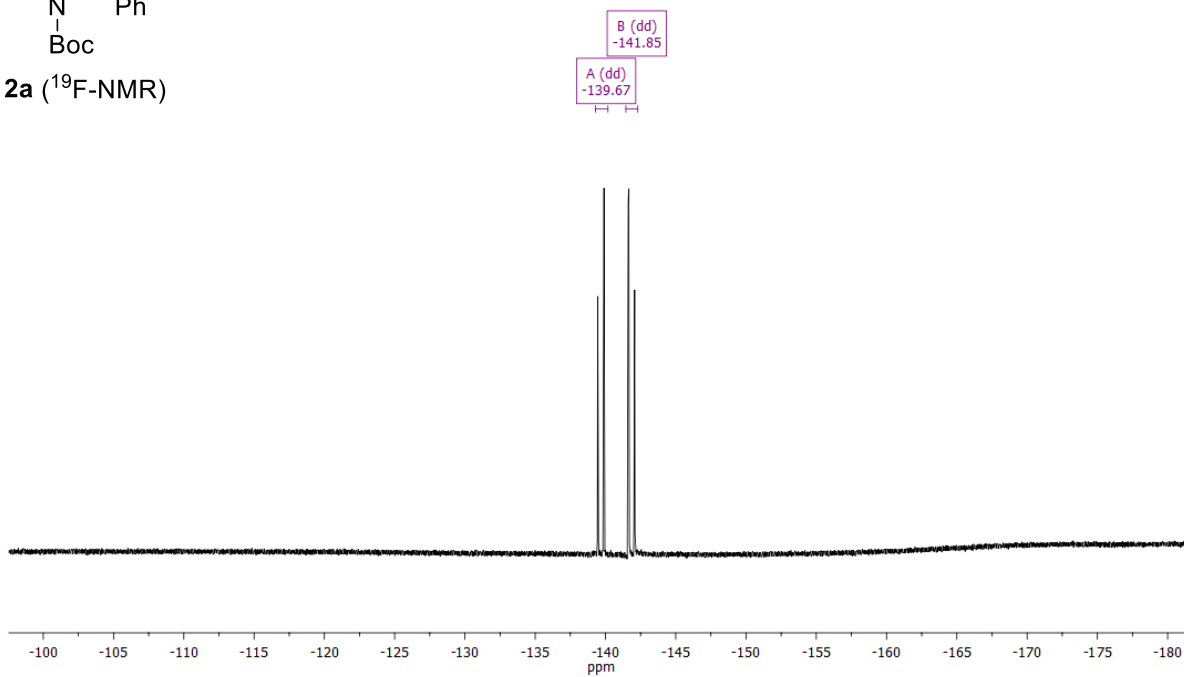

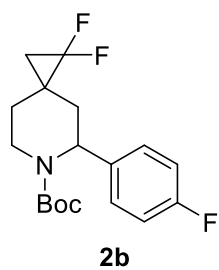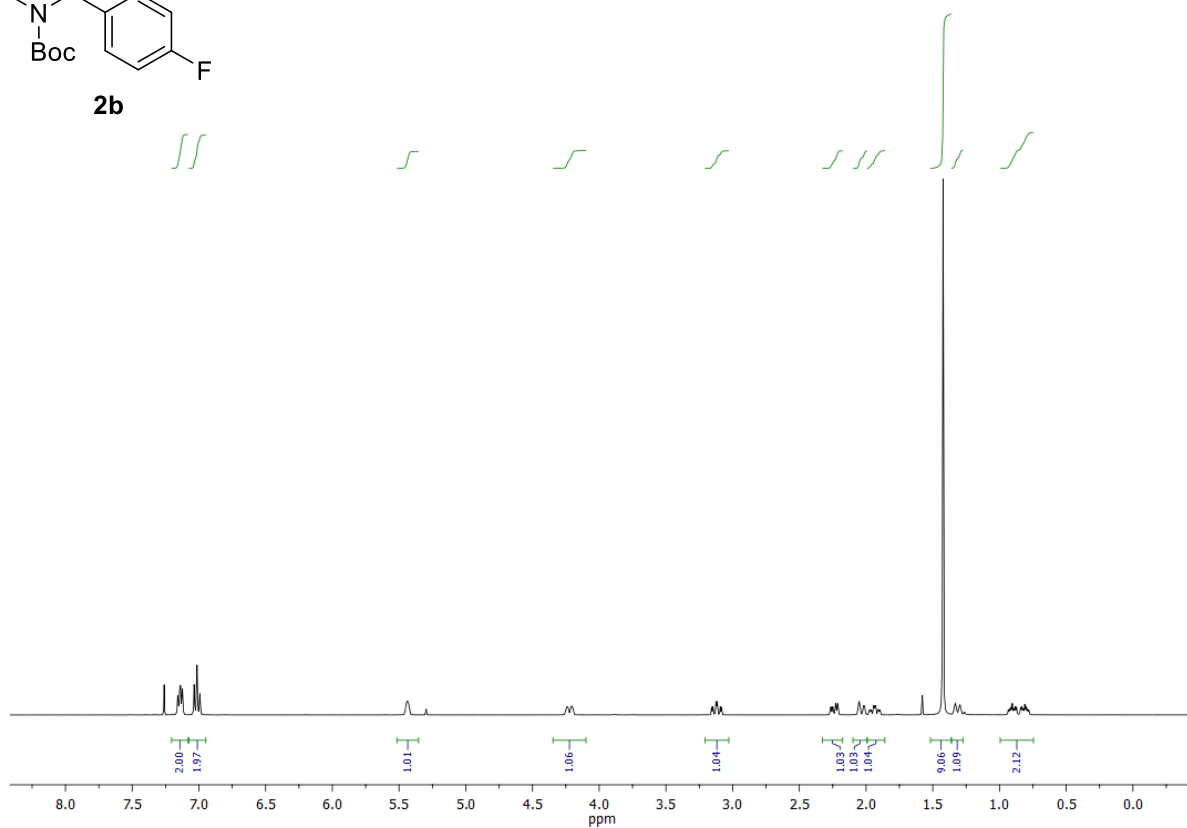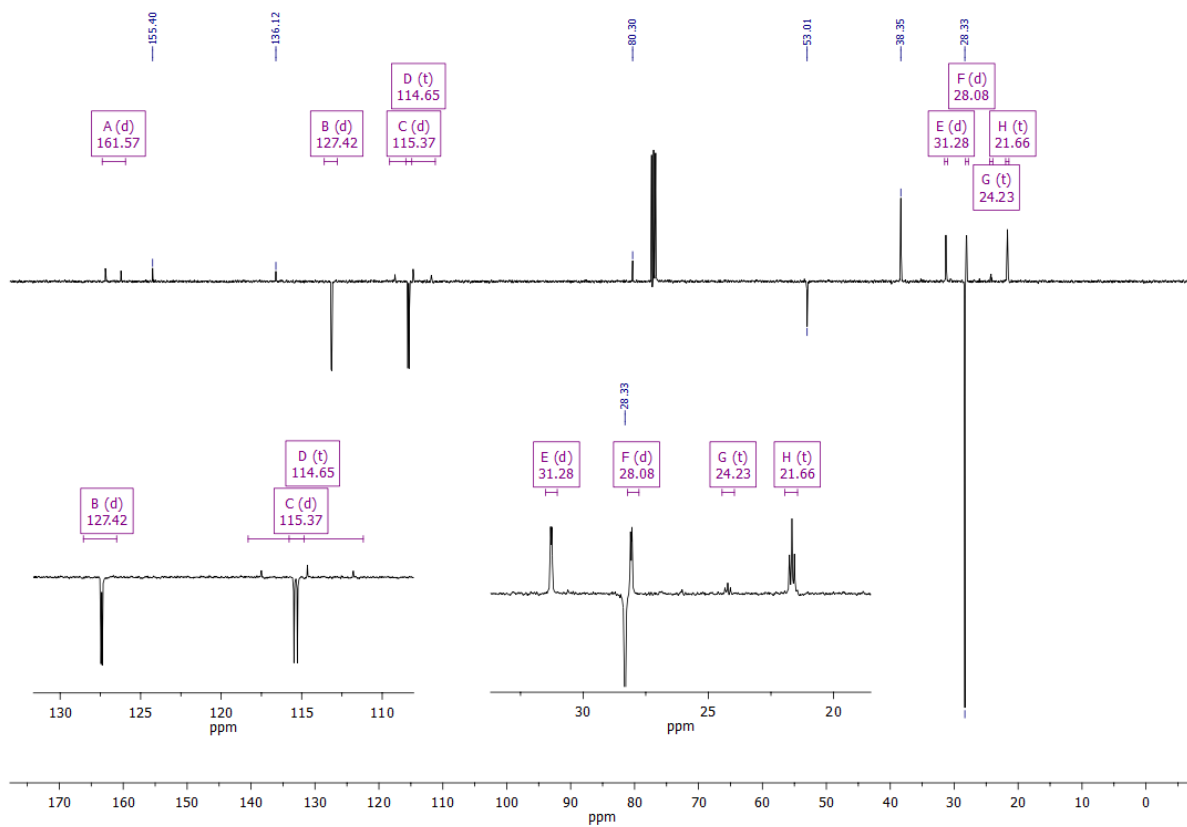

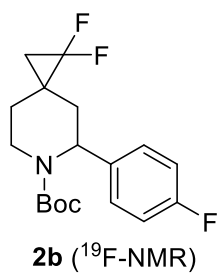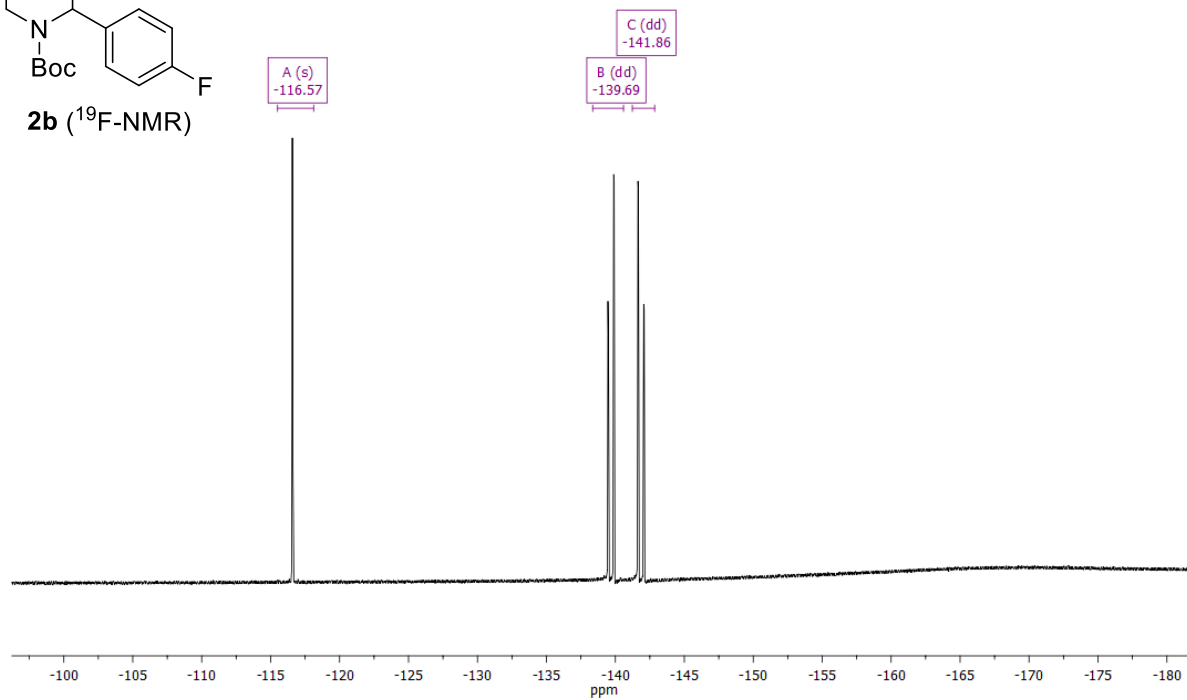

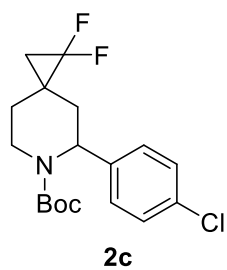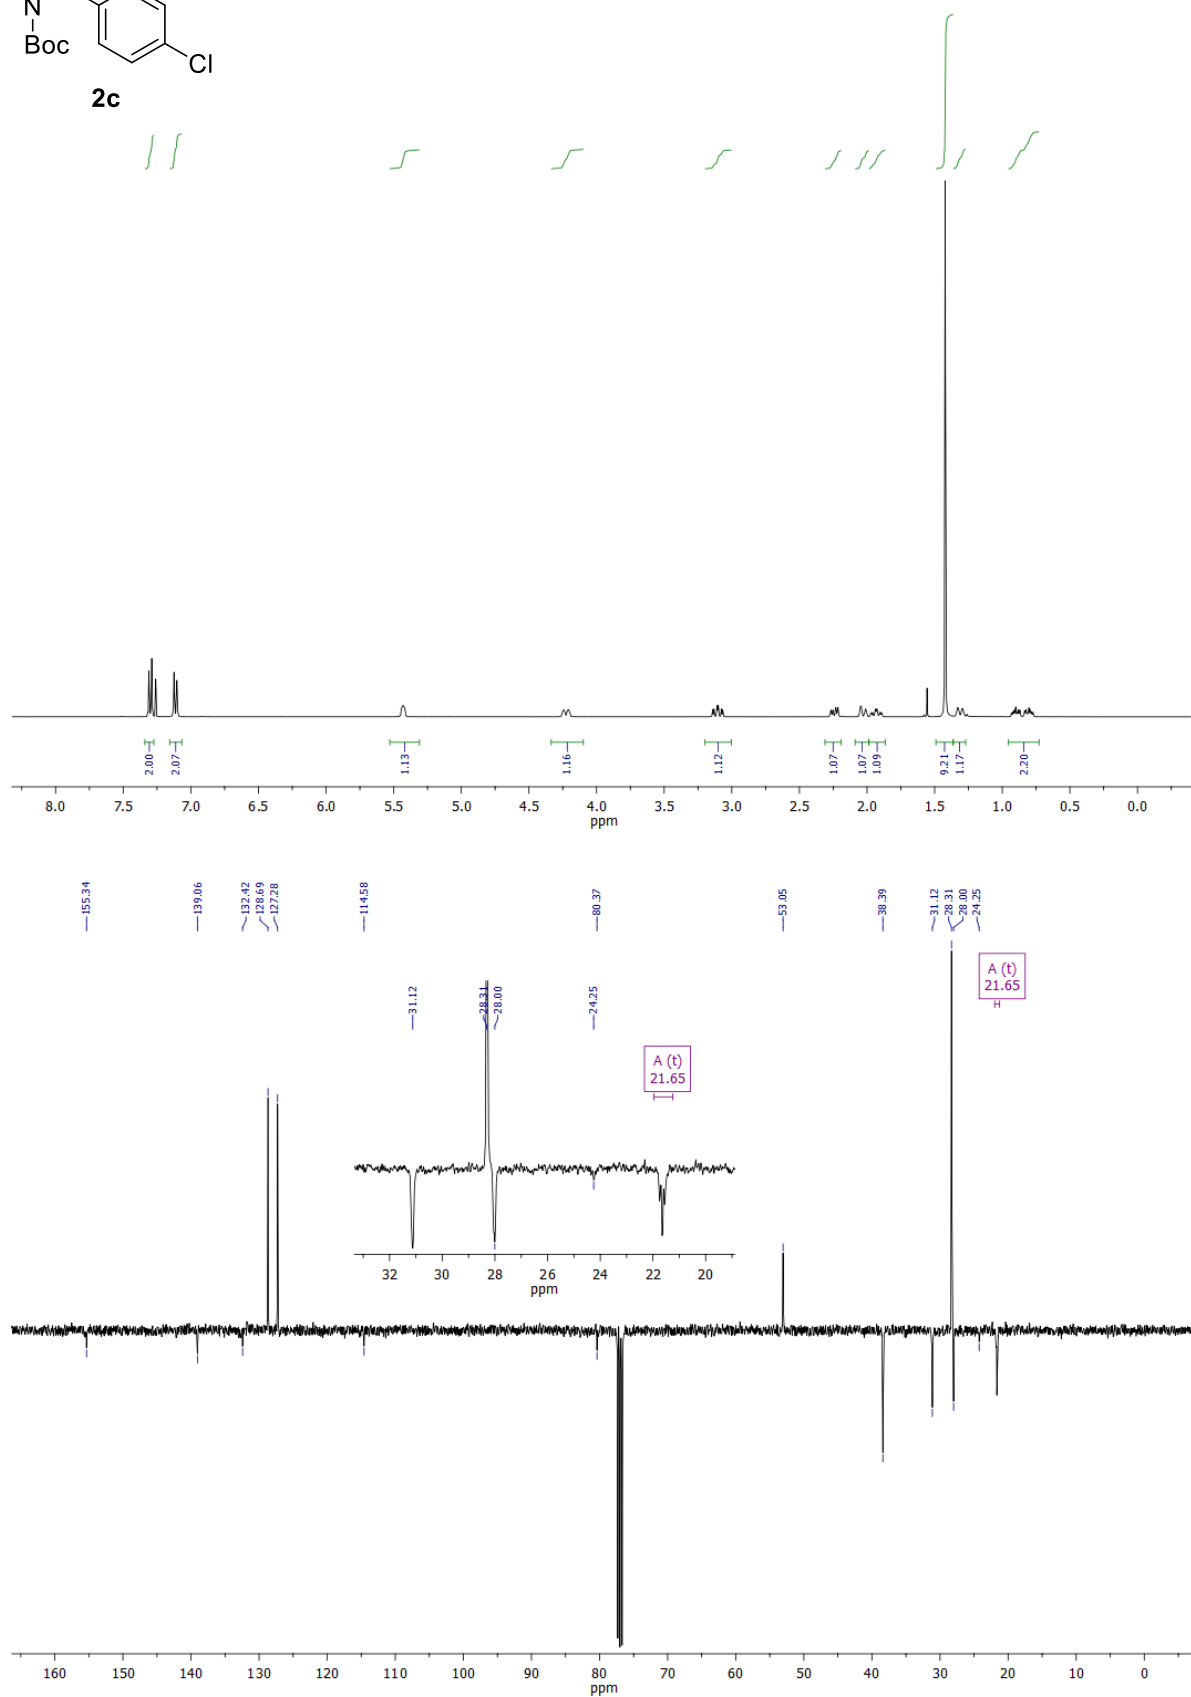

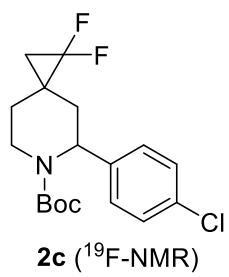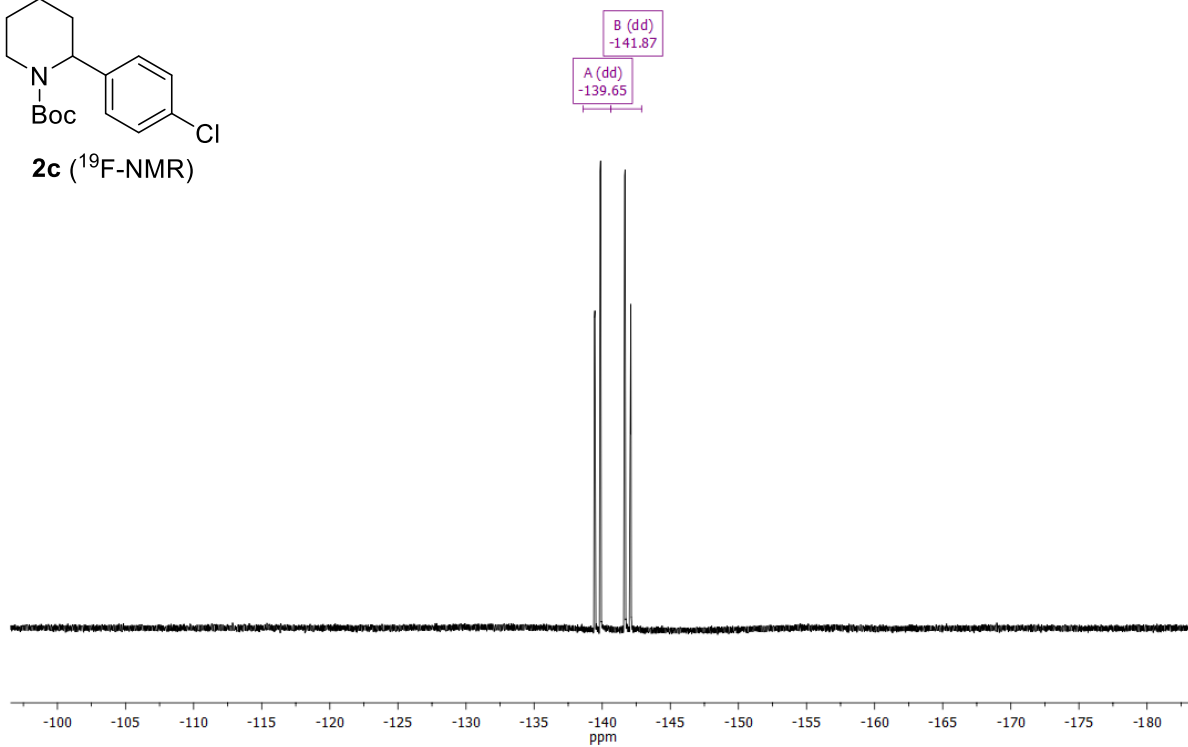

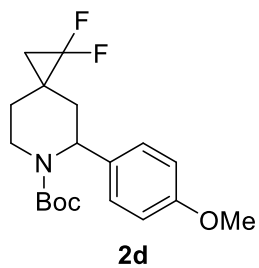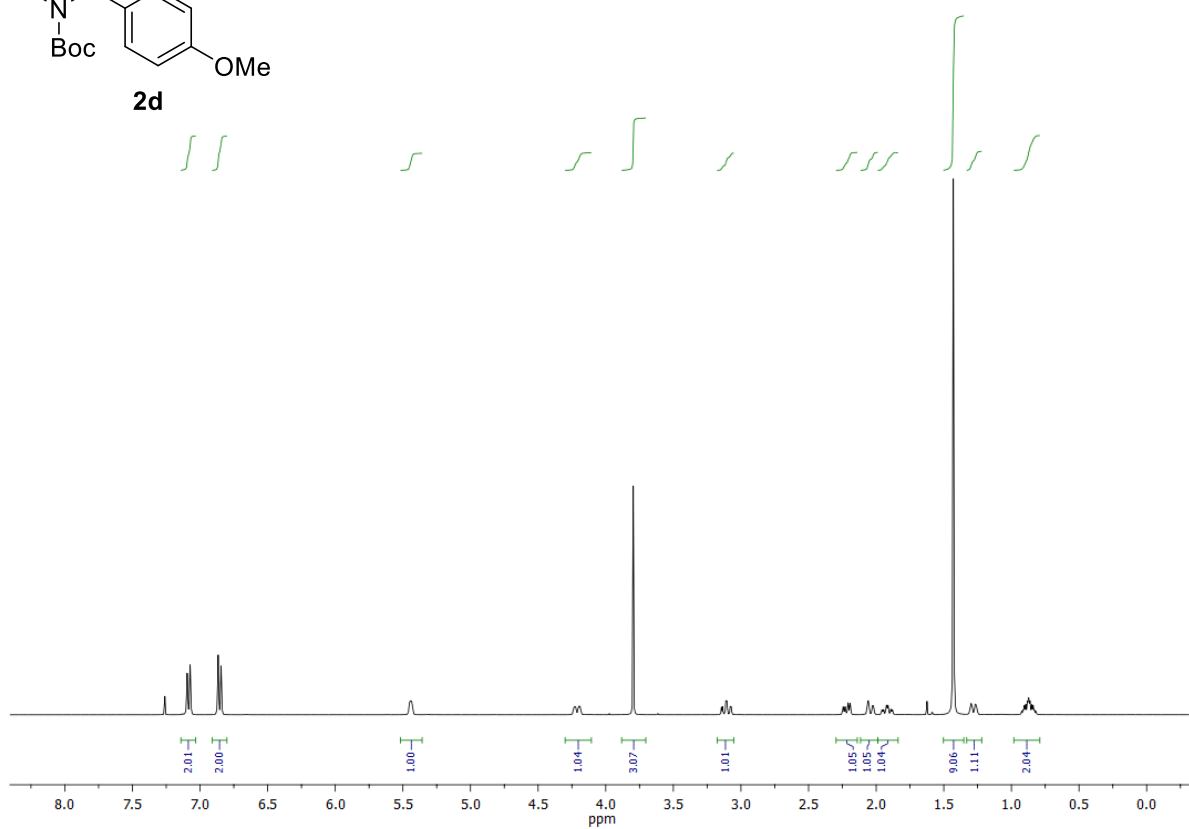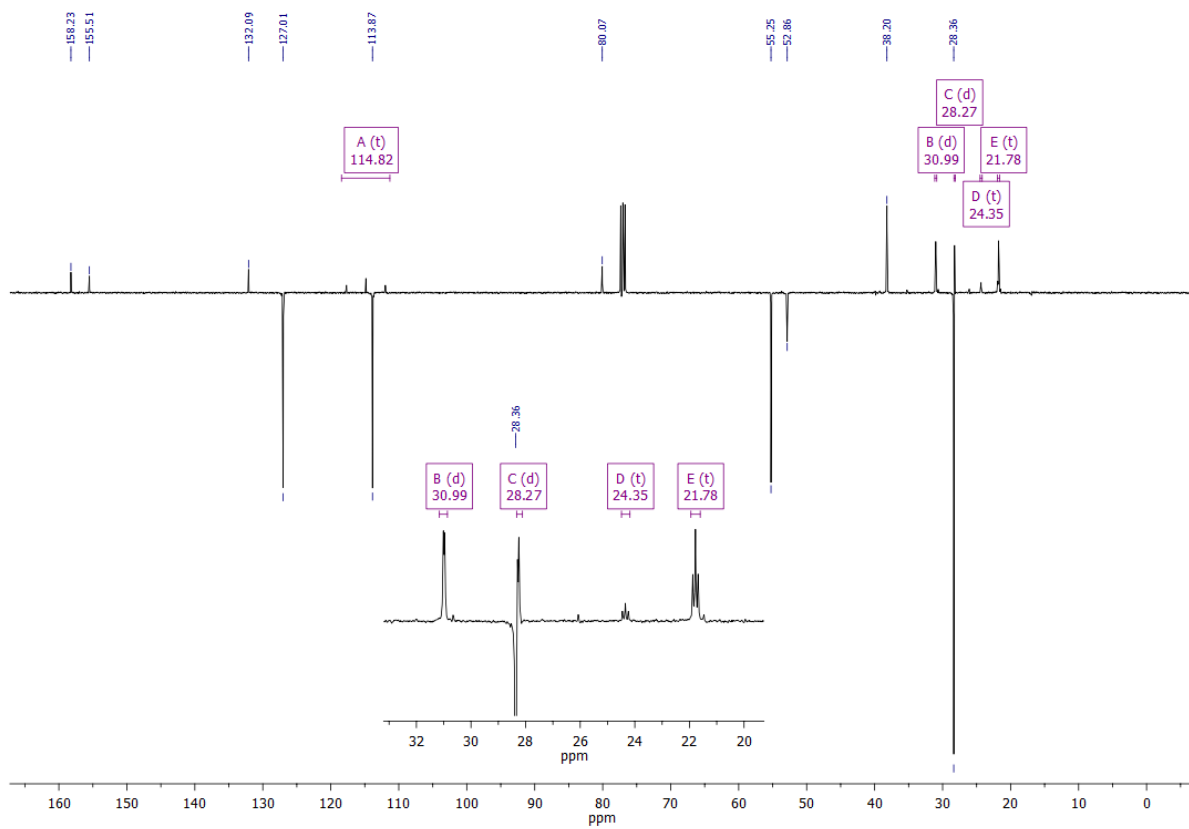



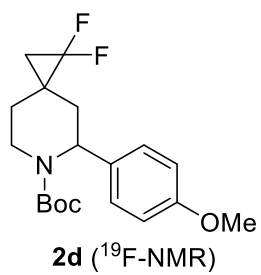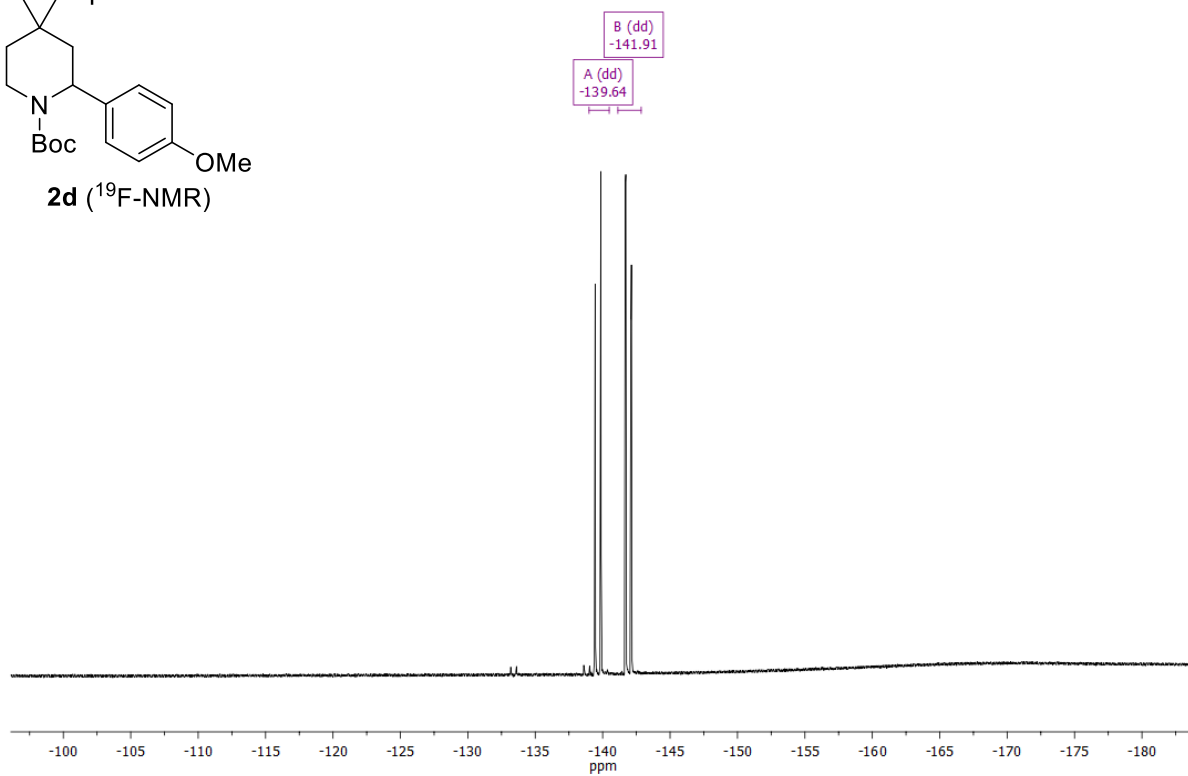

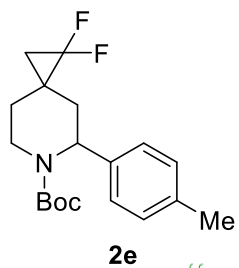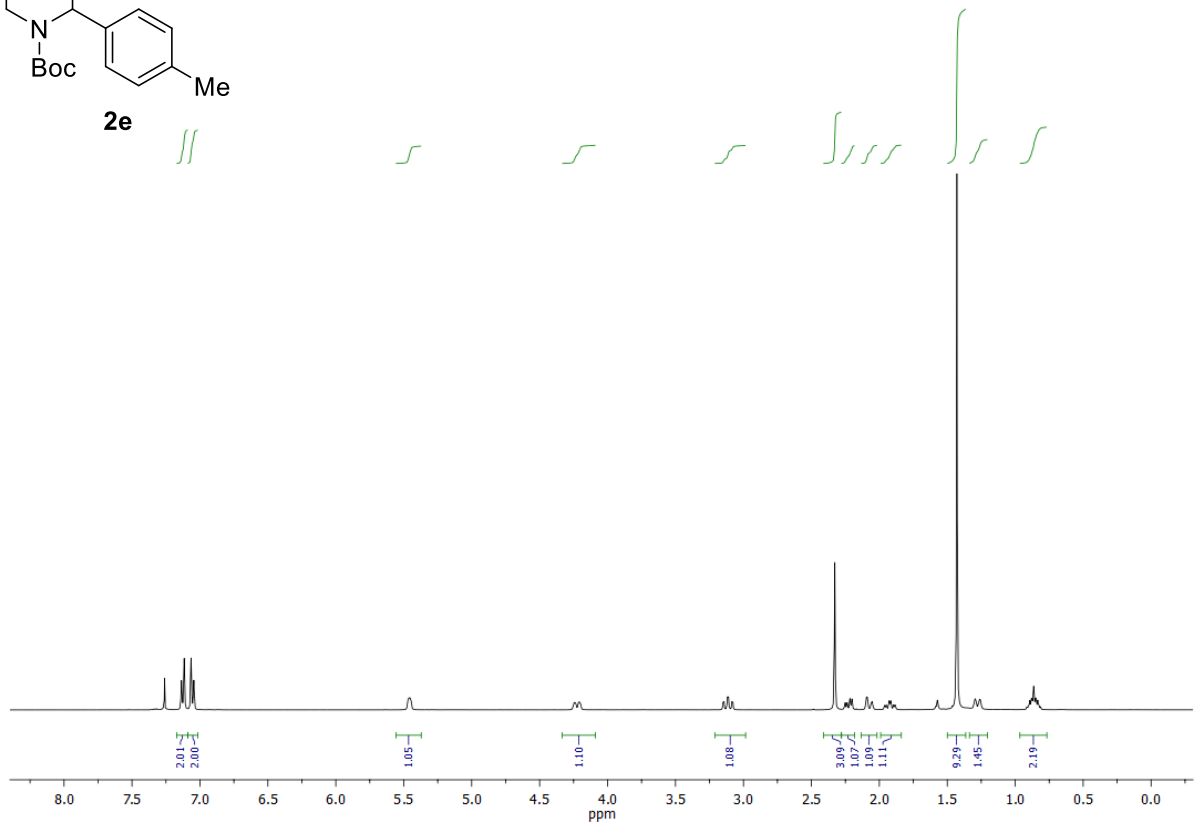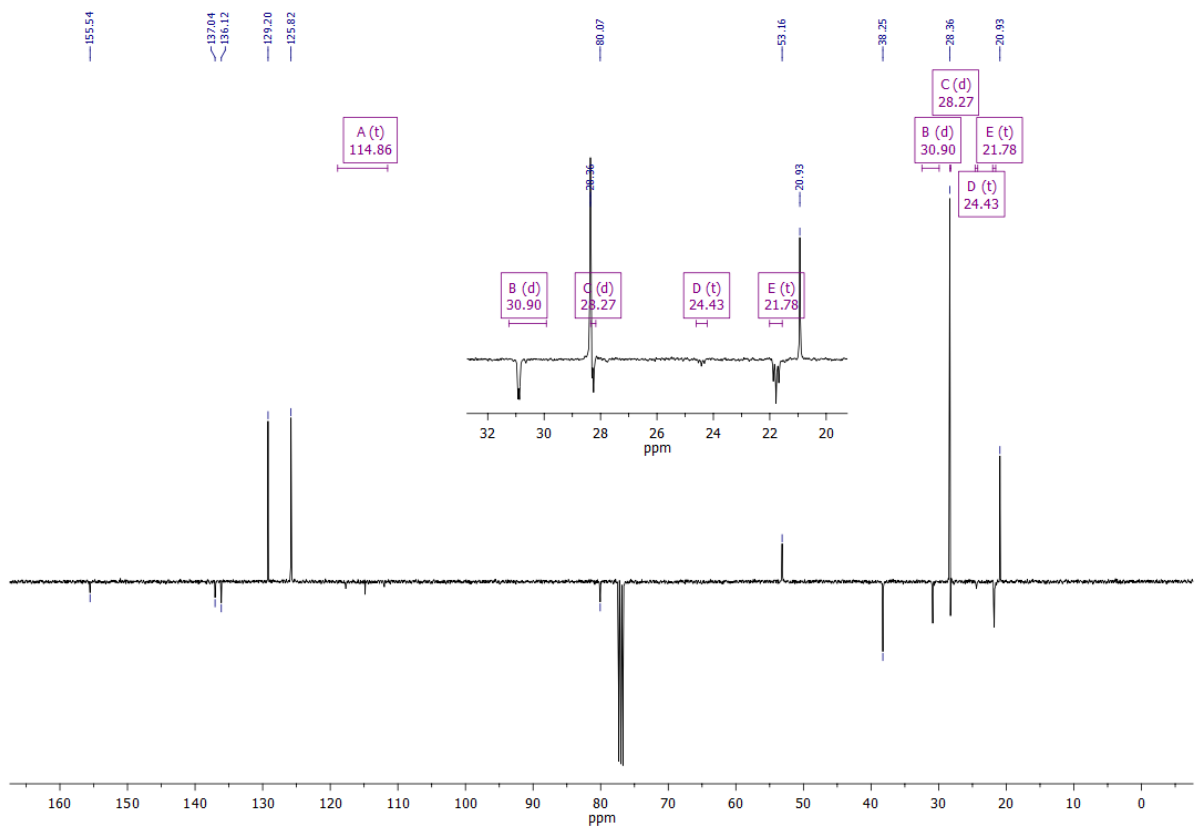

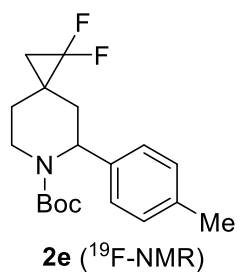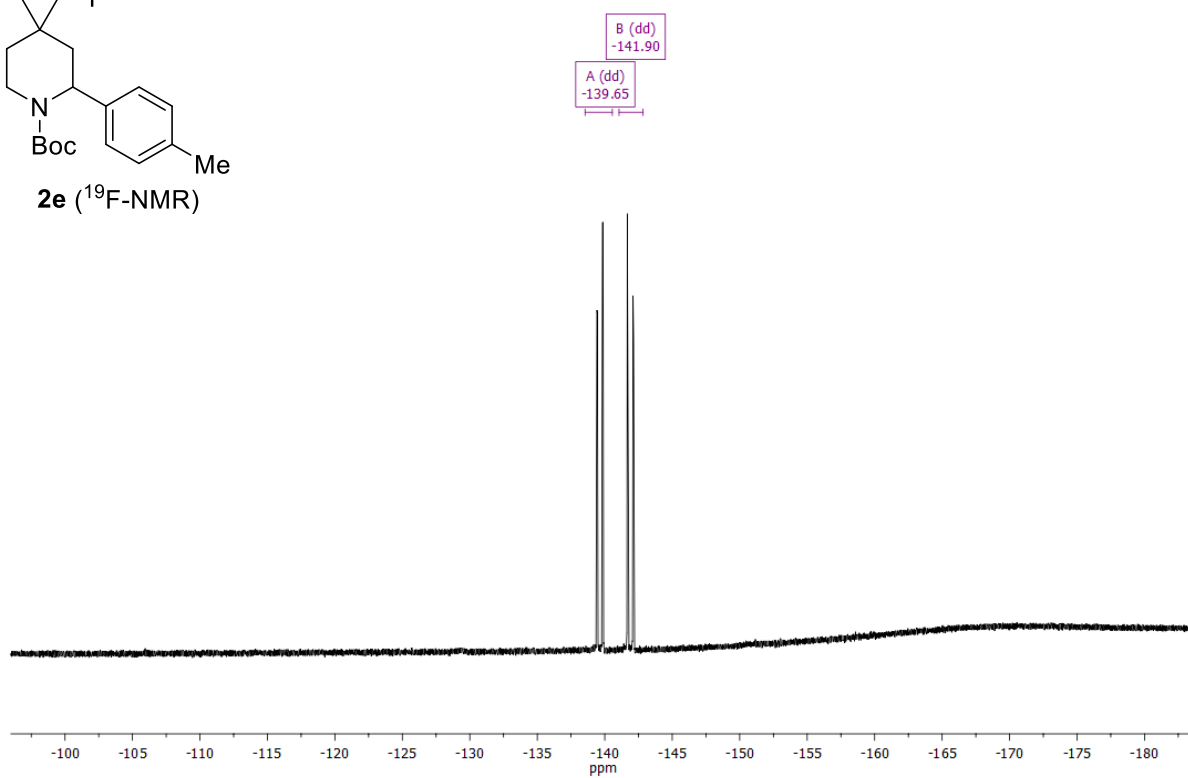

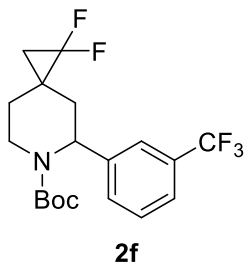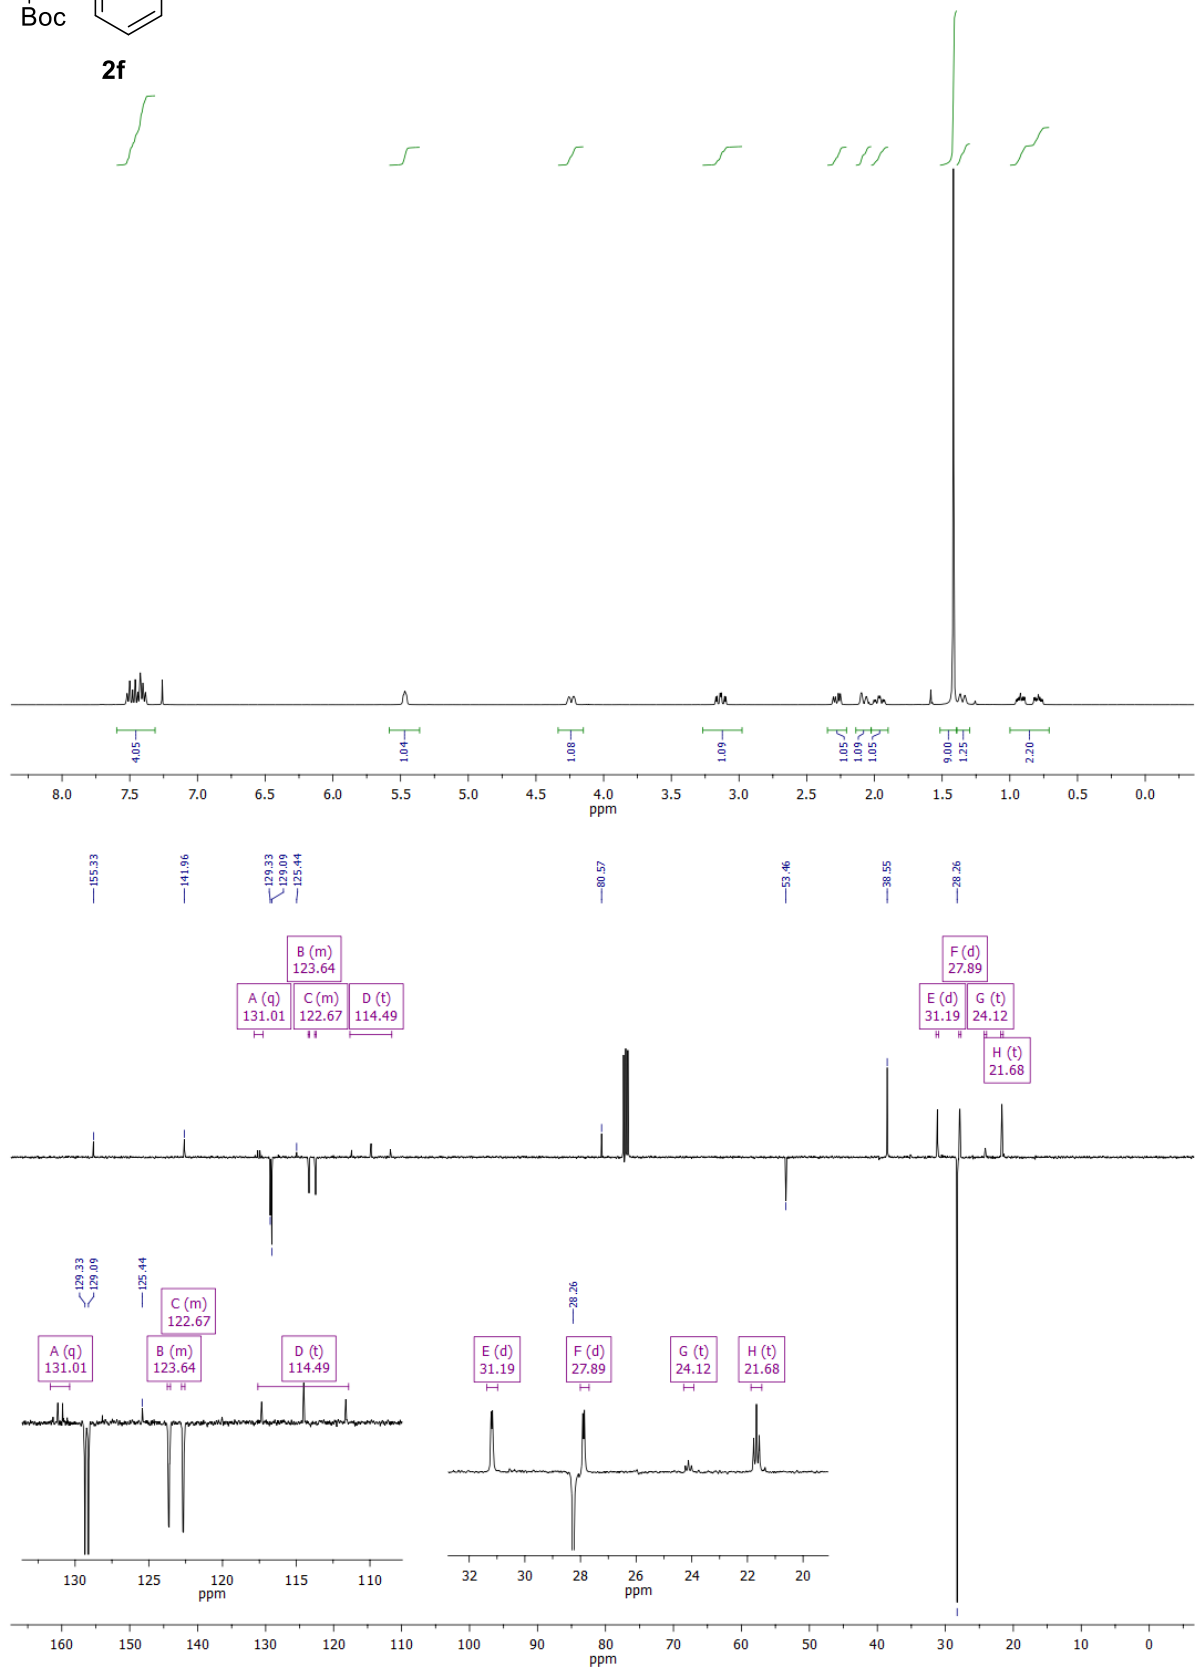

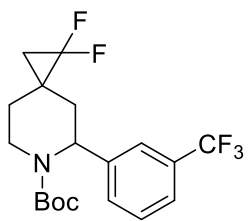

**2f** ( $^{19}\text{F}$ -NMR)

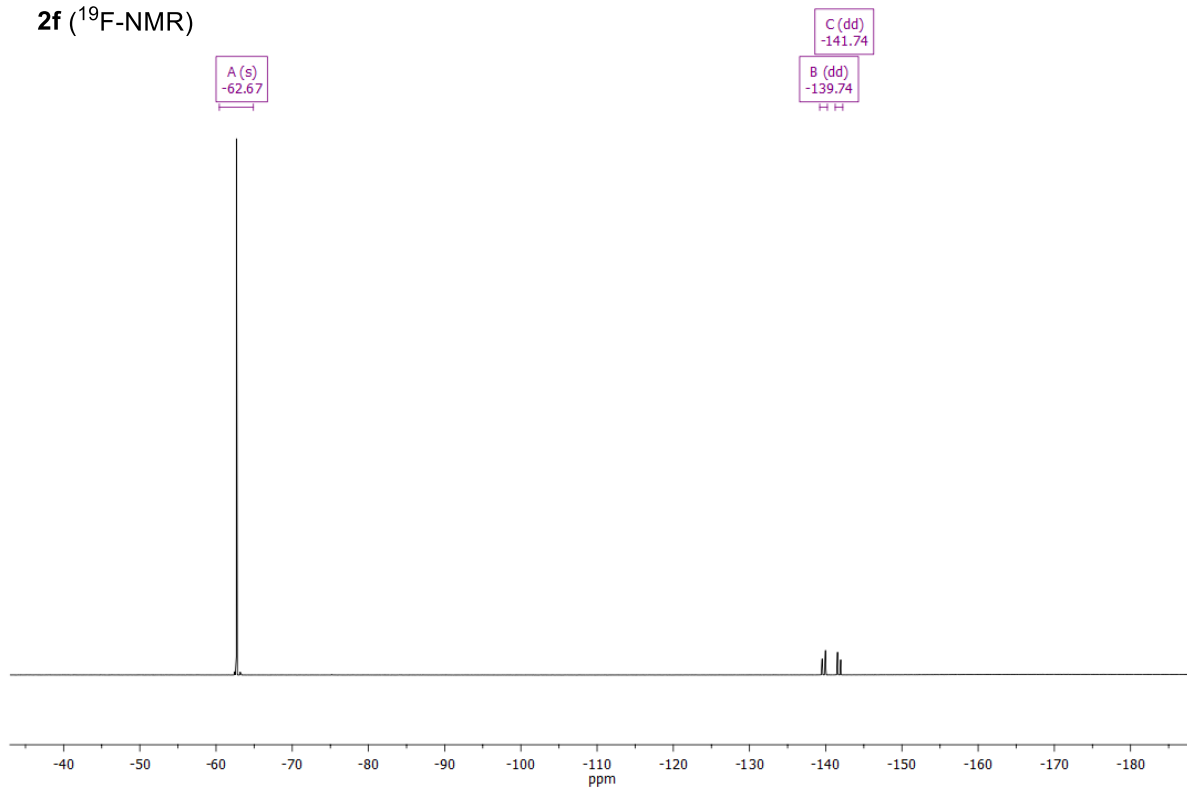

Precursor to compound **4** ( $^1\text{H}$  NMR,  $\text{CDCl}_3$ )

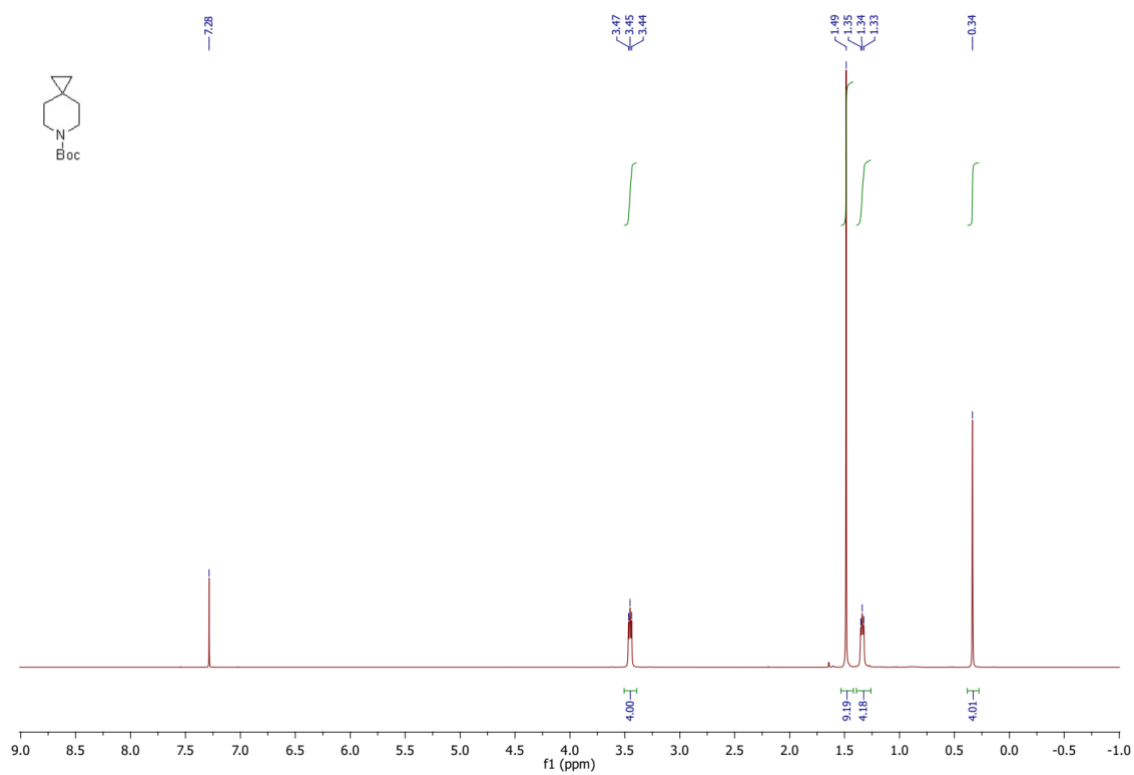

Precursor to compound **4** ( $^{13}\text{C}$  NMR,  $\text{CDCl}_3$ )

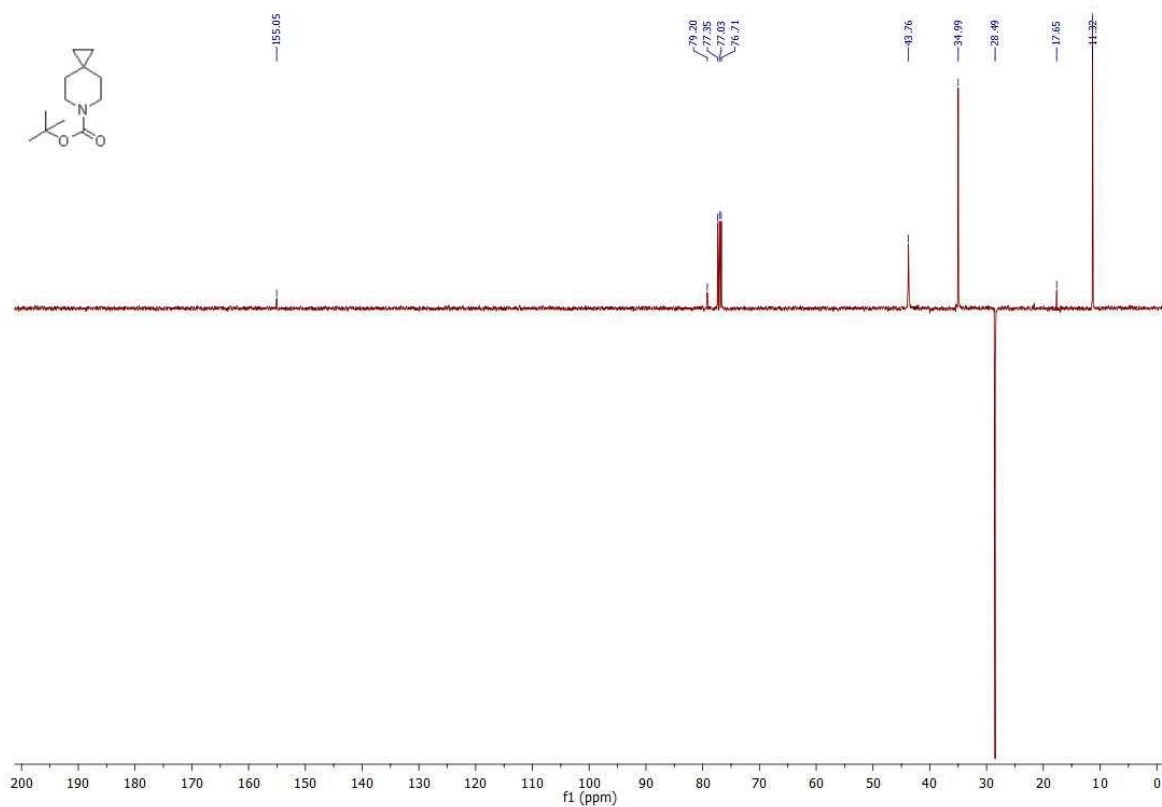

Compound 4 ( $^1\text{H}$  NMR,  $\text{CDCl}_3$ )

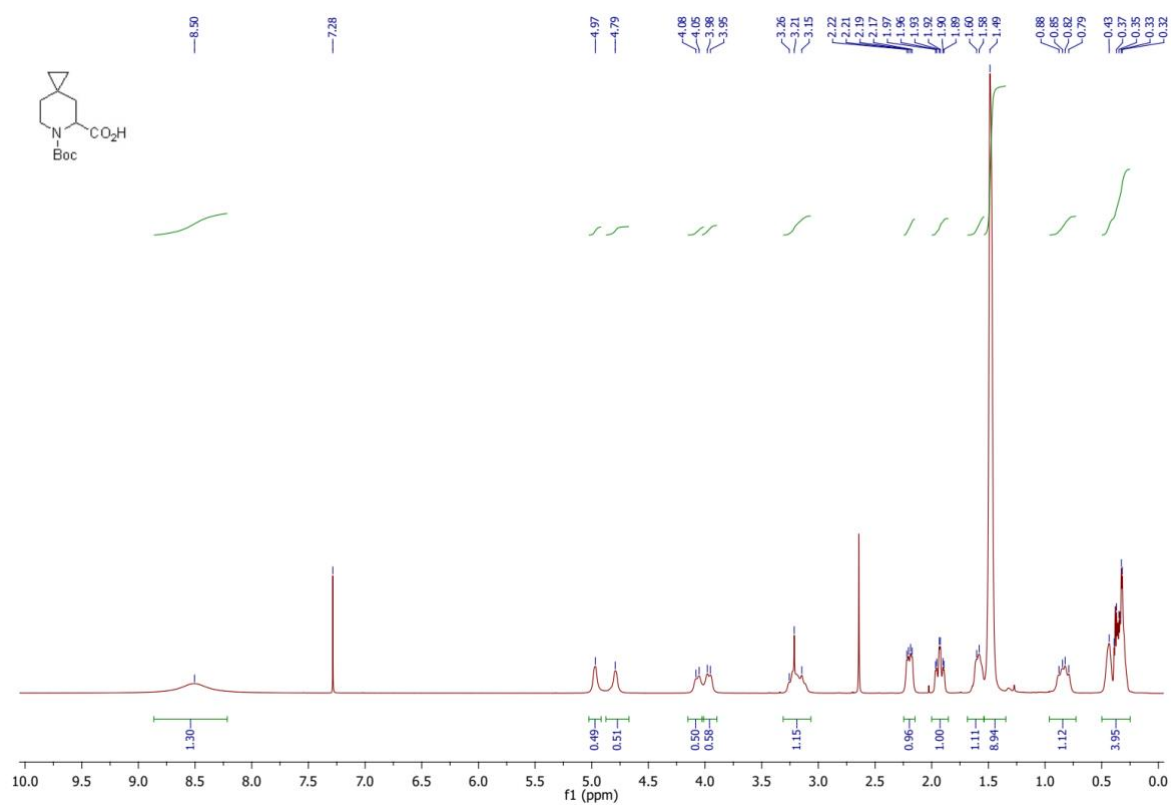

Compound 4 ( $^{13}\text{C}$  NMR,  $\text{CDCl}_3$ )

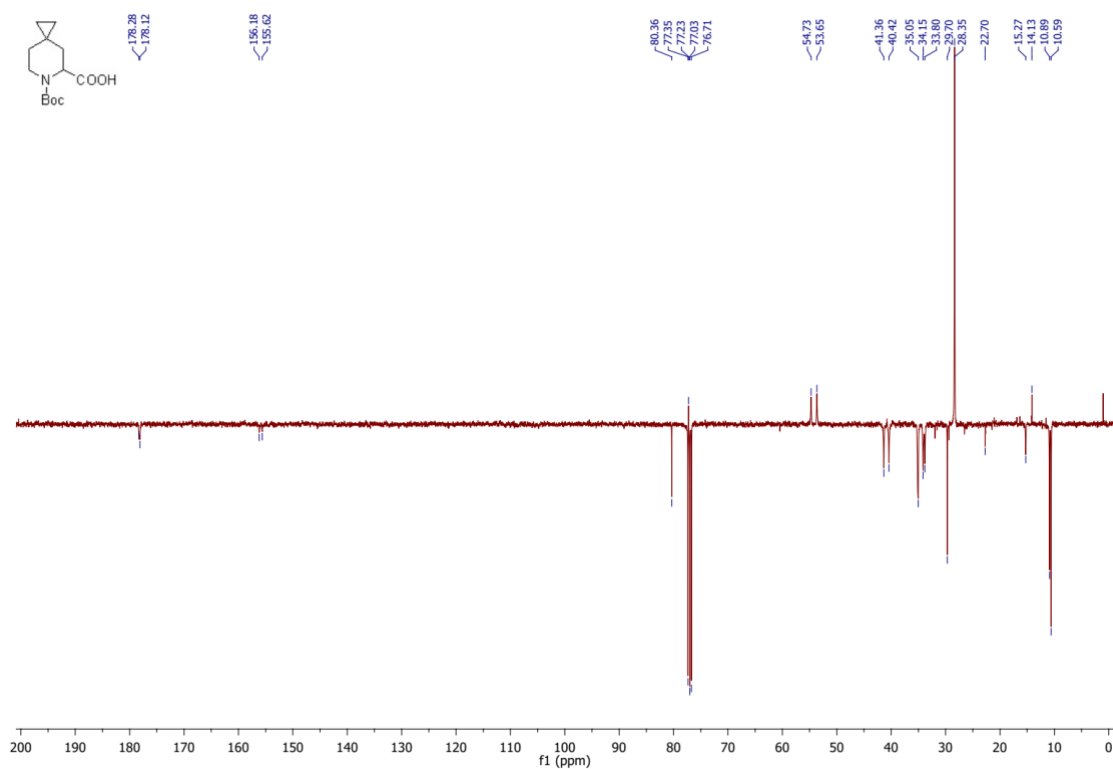

Compound **5** ( $^1\text{H}$  NMR,  $\text{CDCl}_3$ )

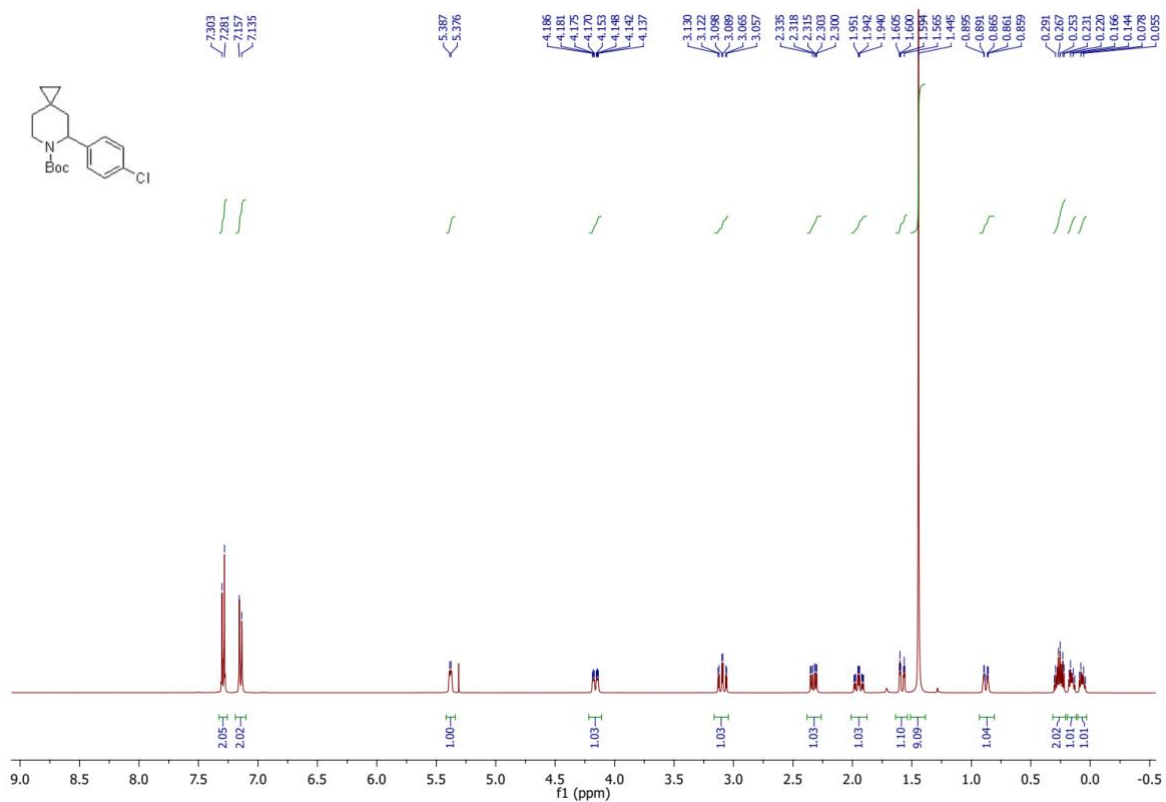

Compound **5** ( $^{13}\text{C}$  NMR,  $\text{CDCl}_3$ )

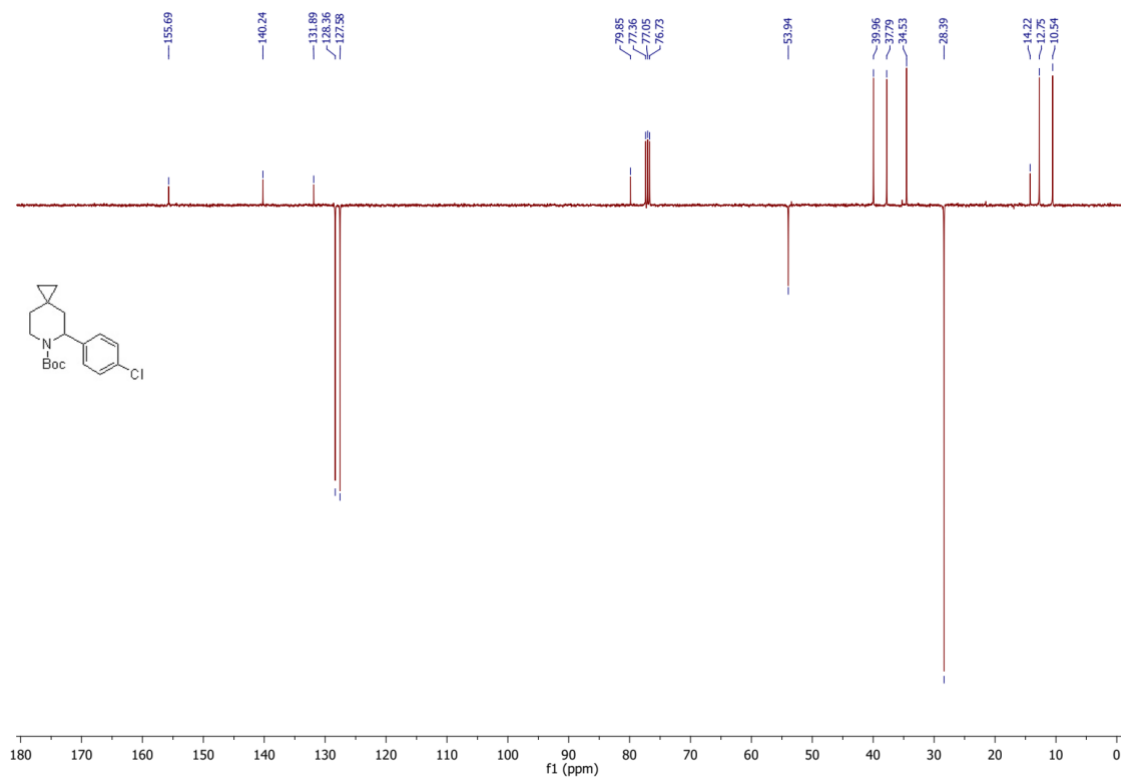



Compound **6** ( $^1\text{H}$  NMR,  $\text{CDCl}_3$ )

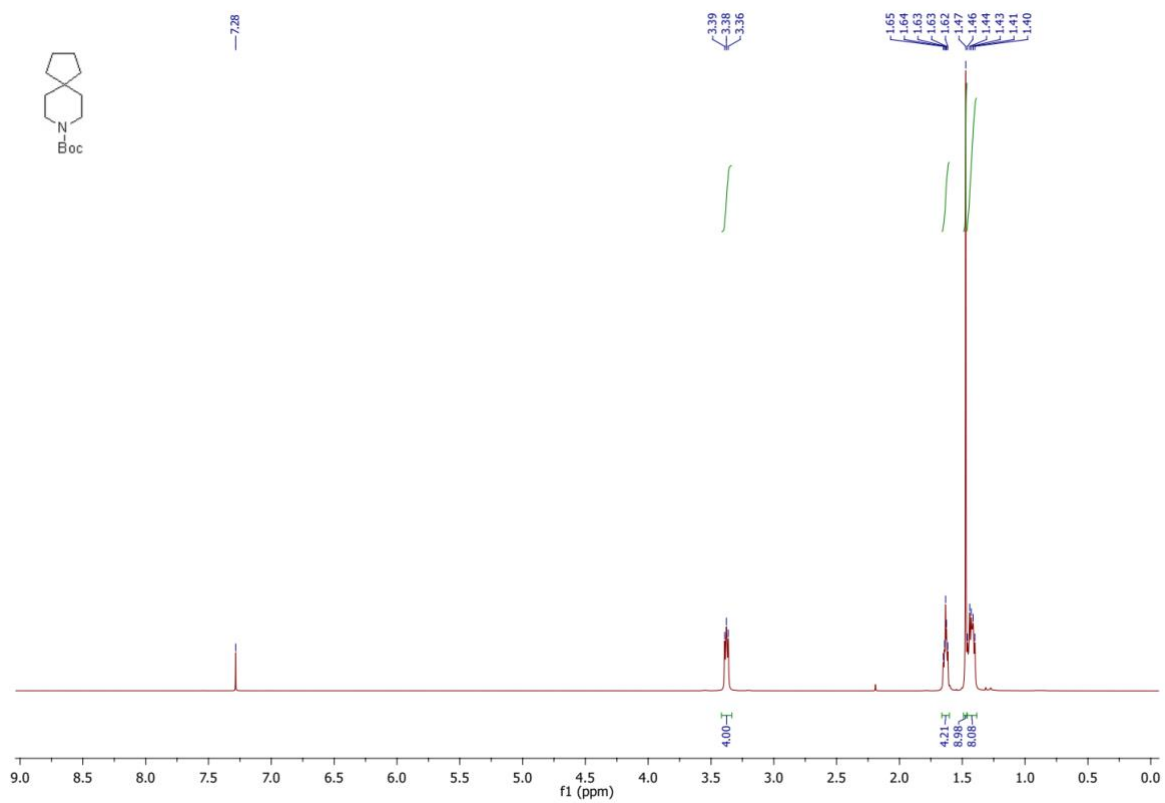

Compound **6** ( $^{13}\text{C}$  NMR,  $\text{CDCl}_3$ )

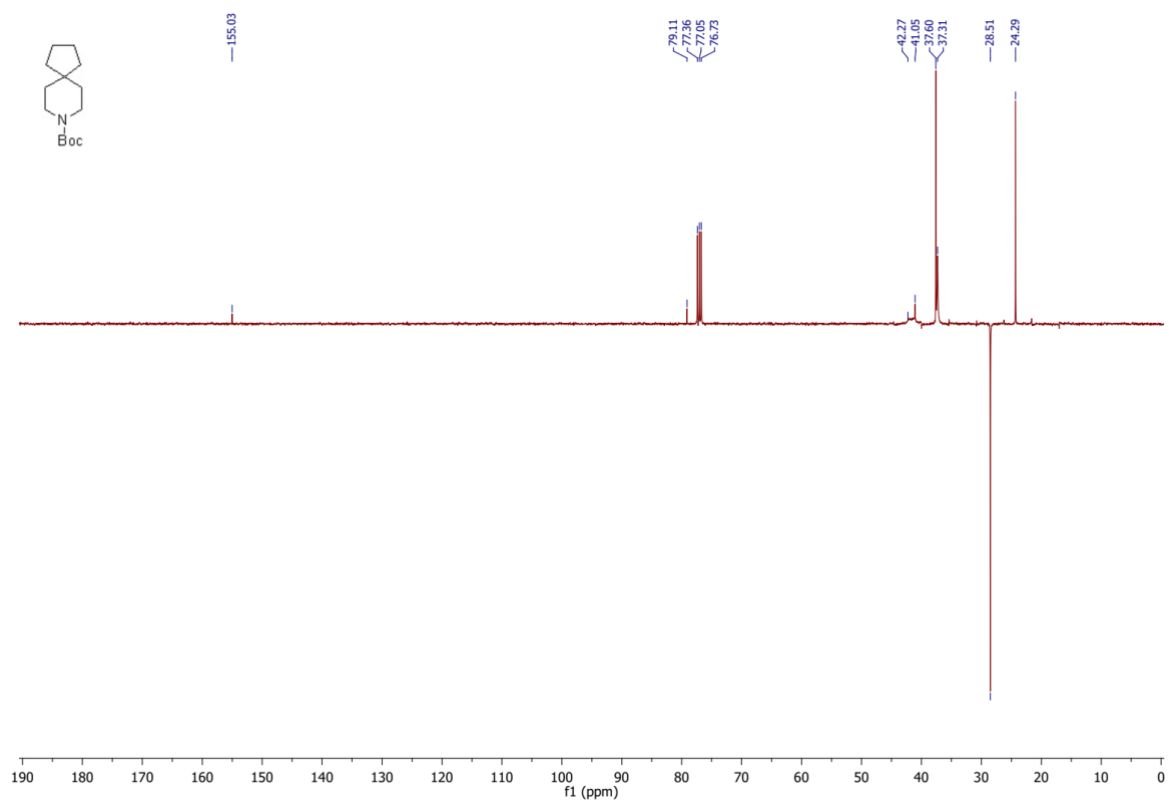

Compound **7** ( $^1\text{H}$  NMR,  $\text{CDCl}_3$ )

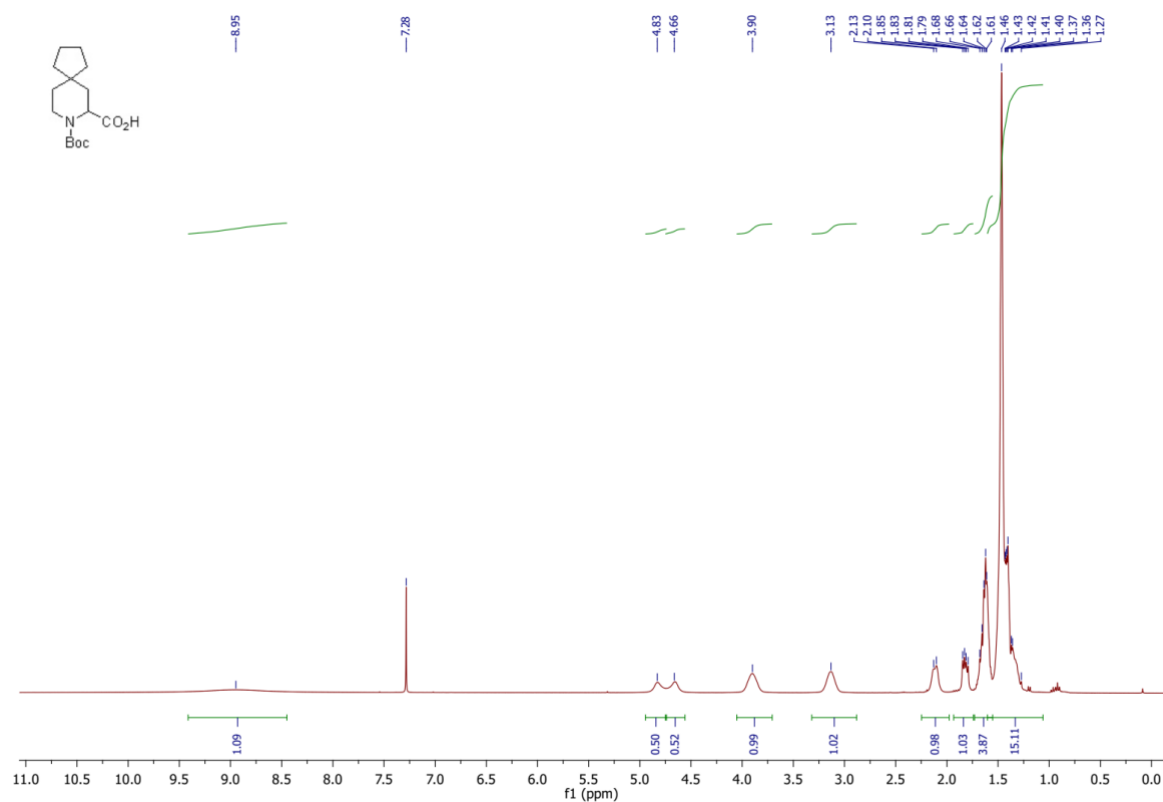

Compound **7** ( $^{13}\text{C}$  NMR,  $\text{CDCl}_3$ )

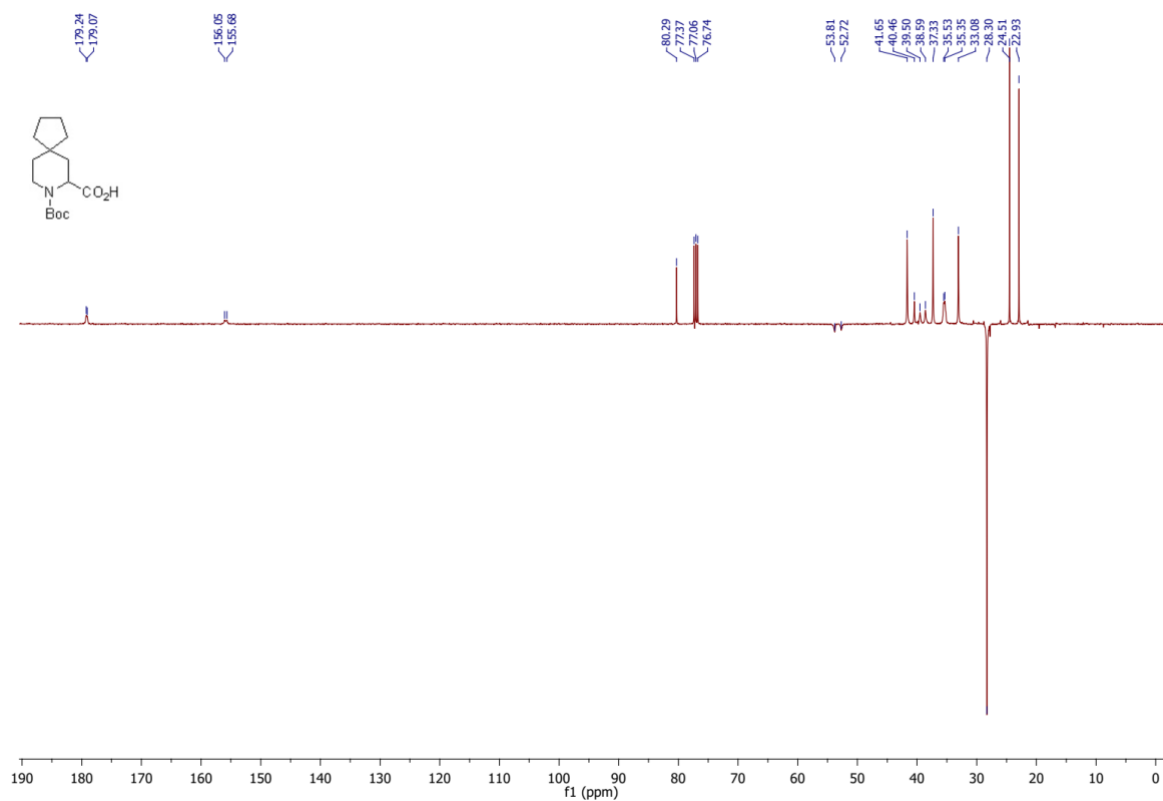

Compound **8** ( $^1\text{H}$  NMR,  $\text{CDCl}_3$ )

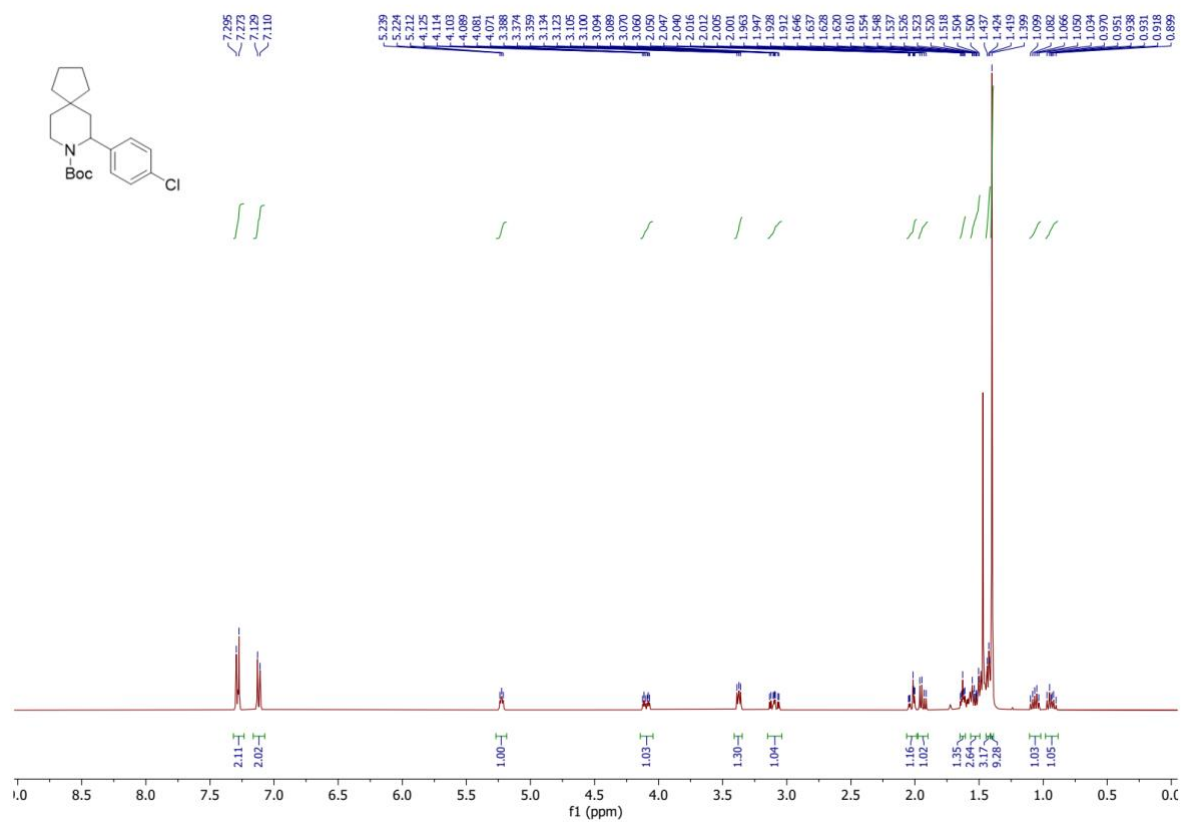

Compound **8** ( $^{13}\text{C}$  NMR,  $\text{CDCl}_3$ )

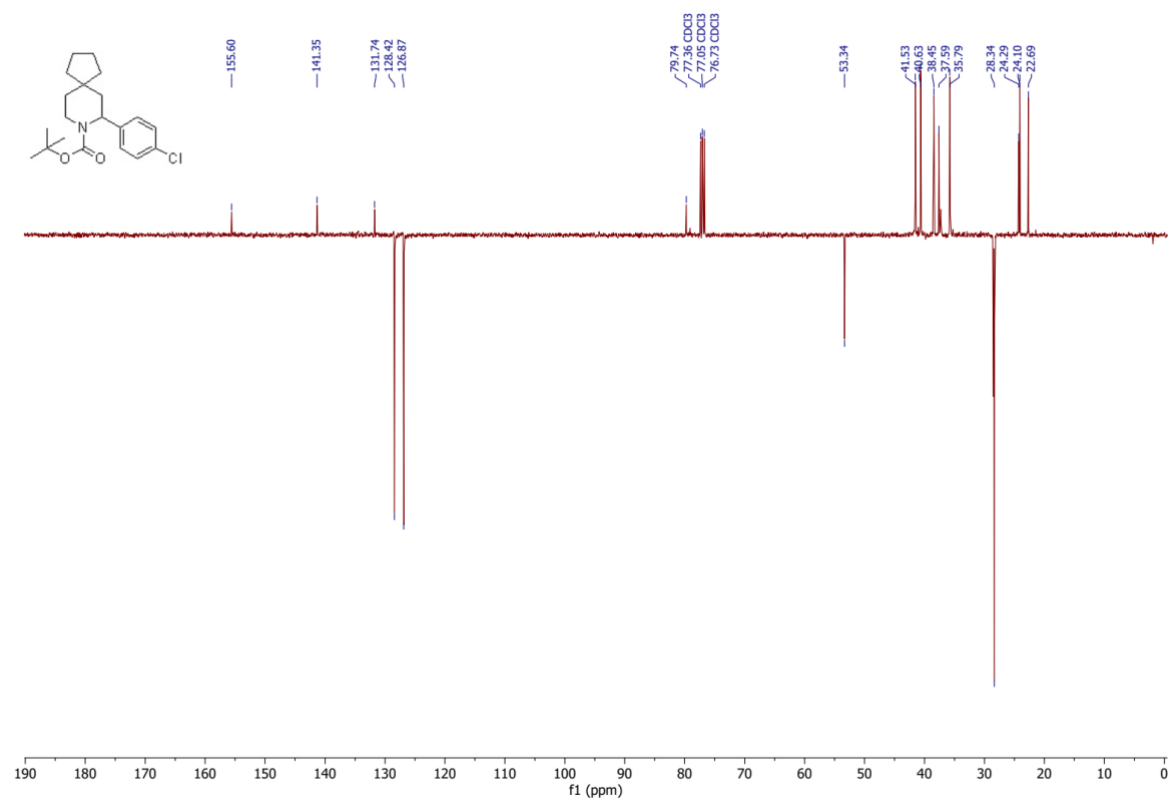

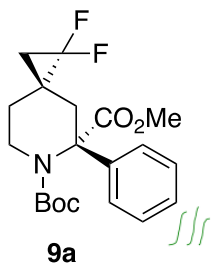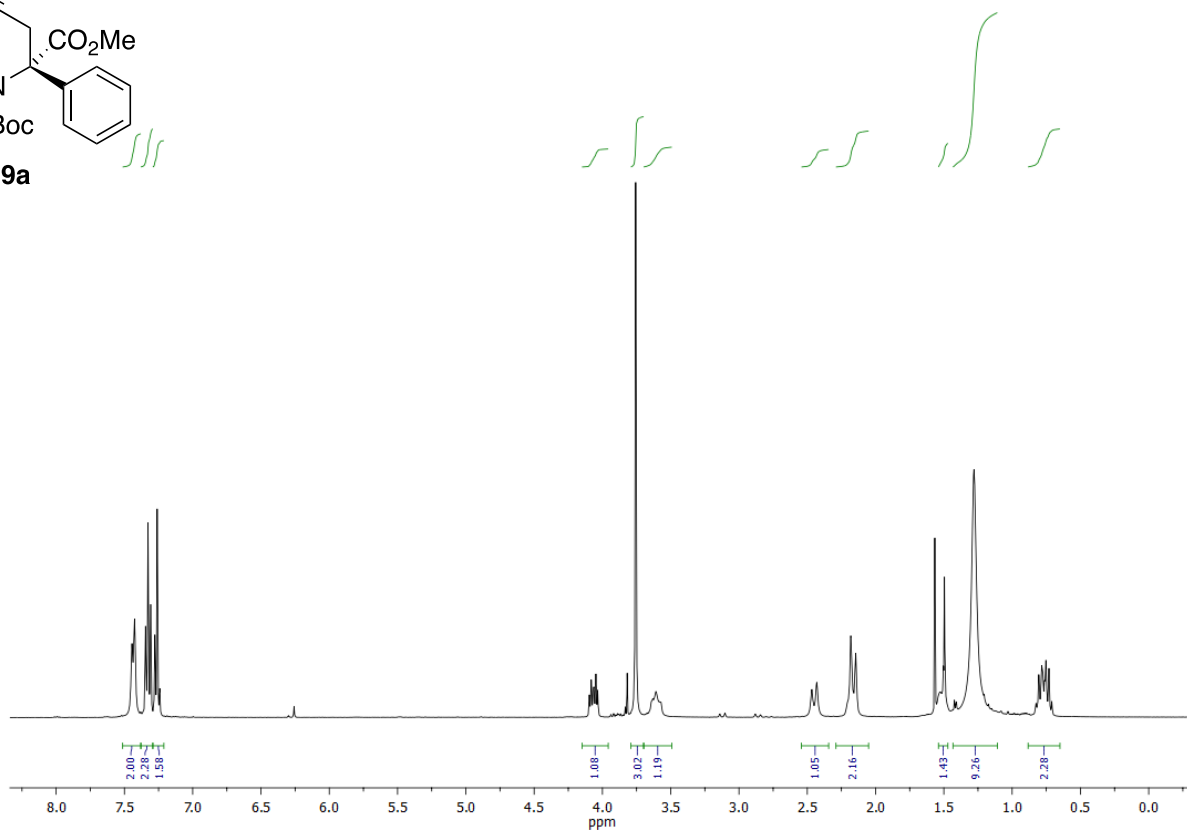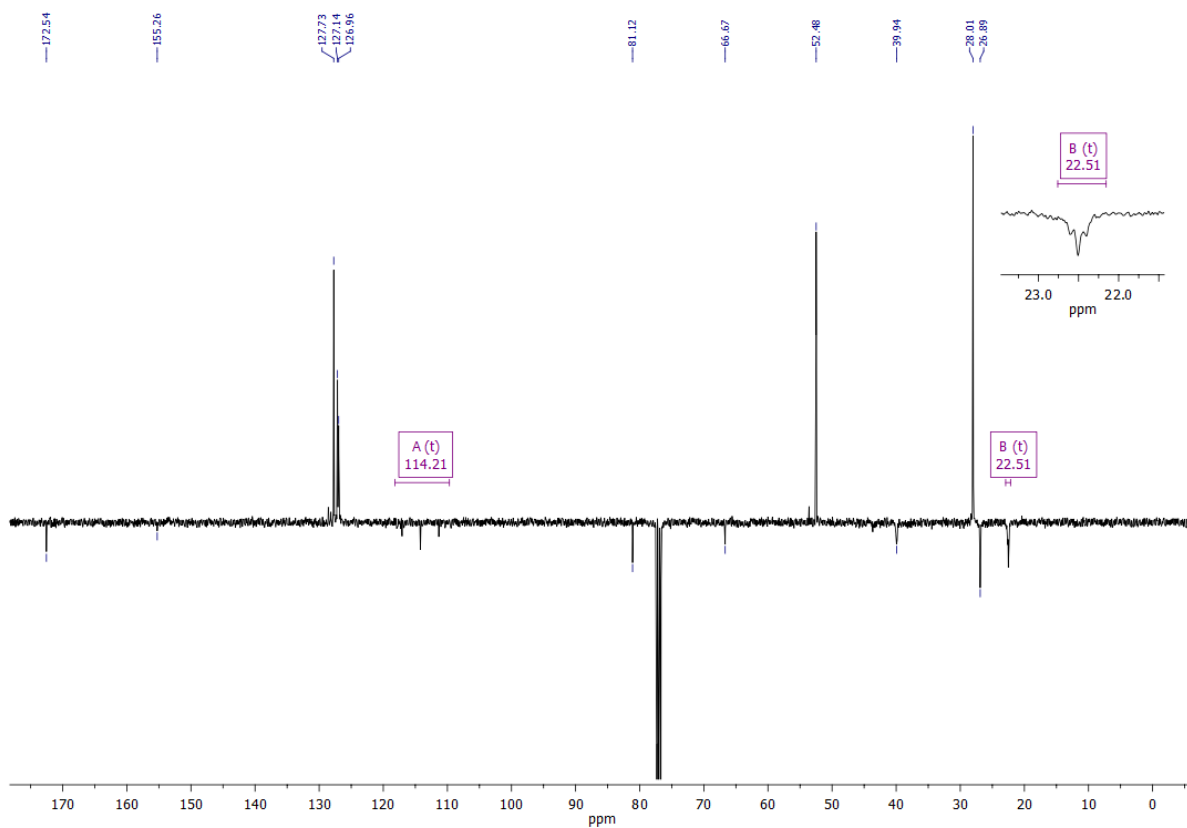

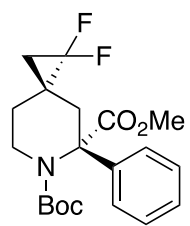

**9a**  
(<sup>19</sup>F NMR)

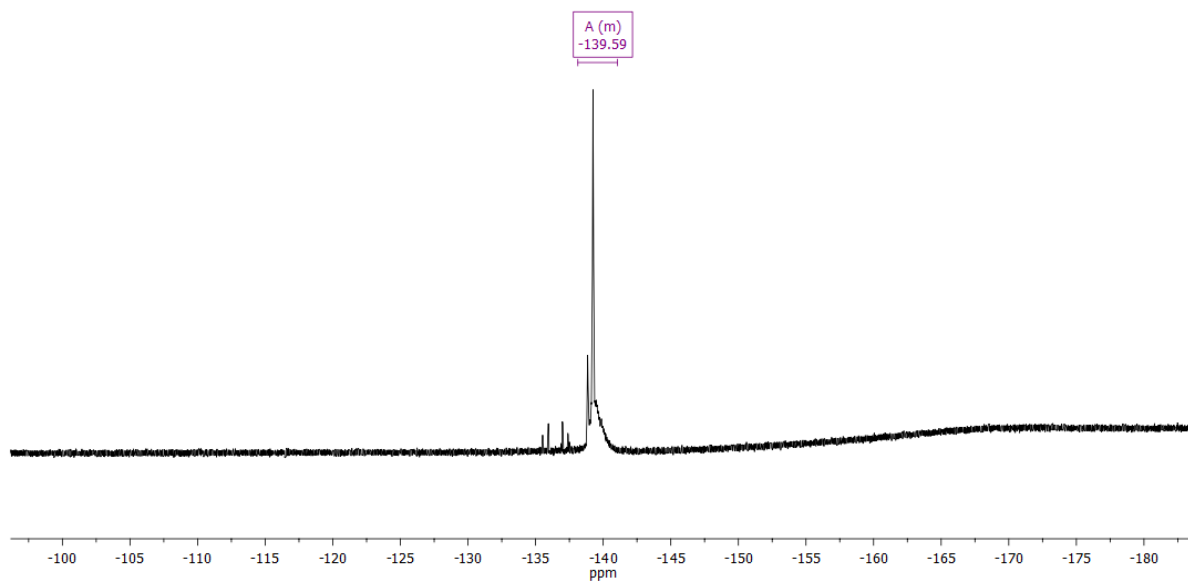

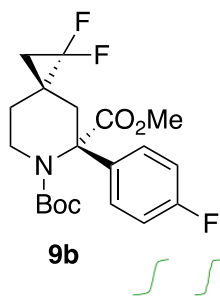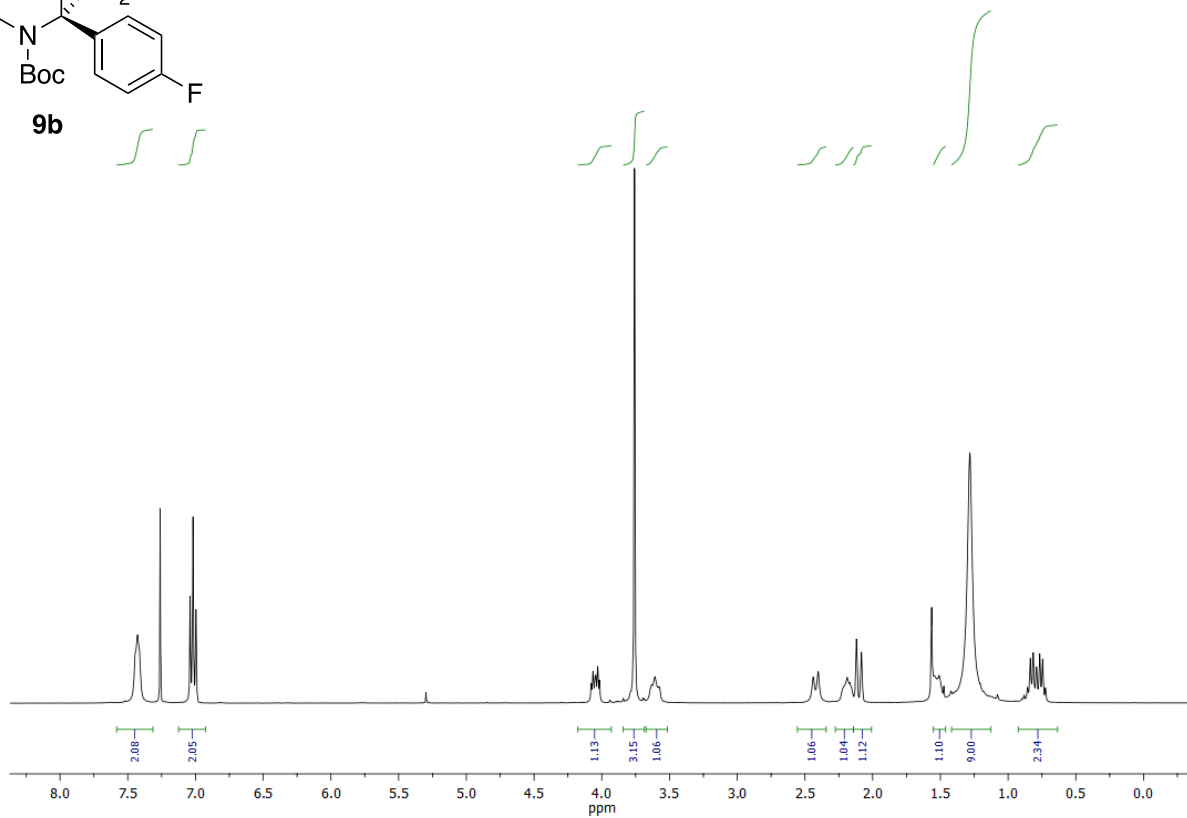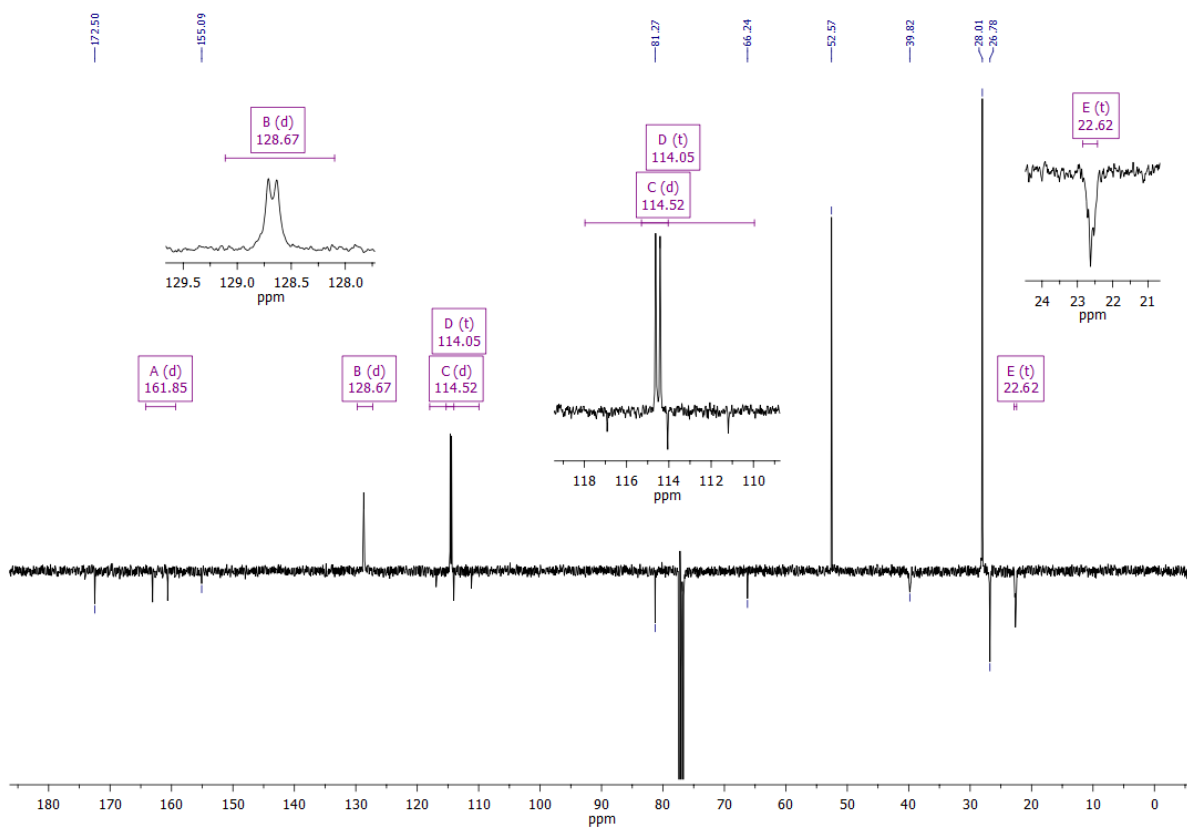

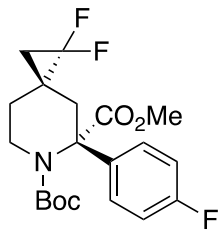

**9b**  
(<sup>19</sup>F NMR)

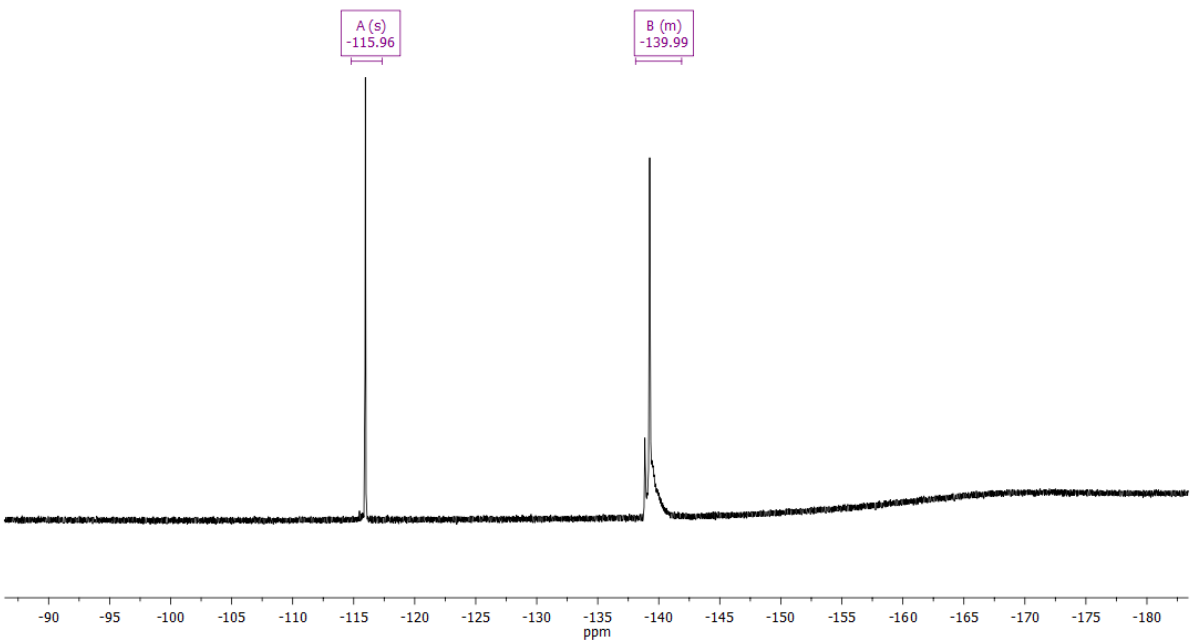

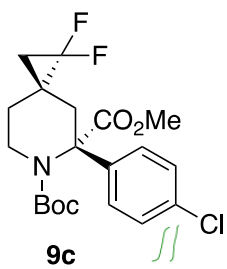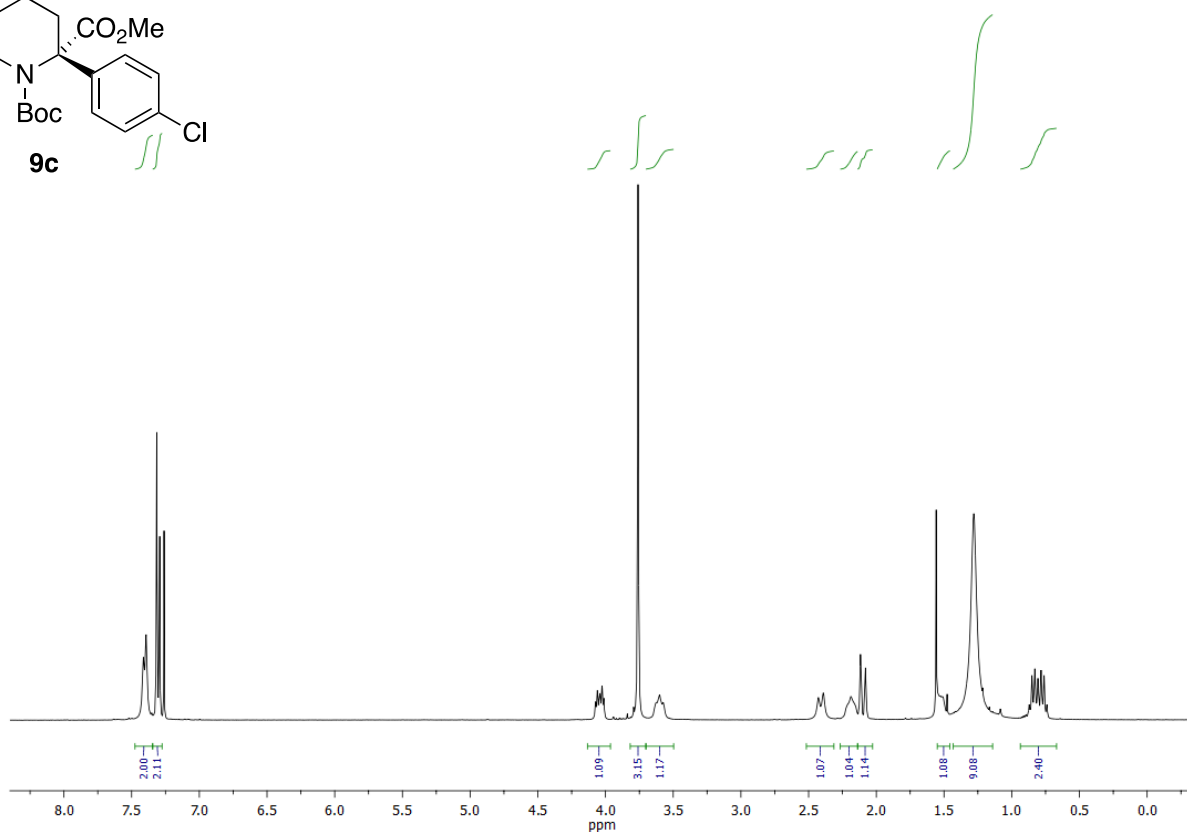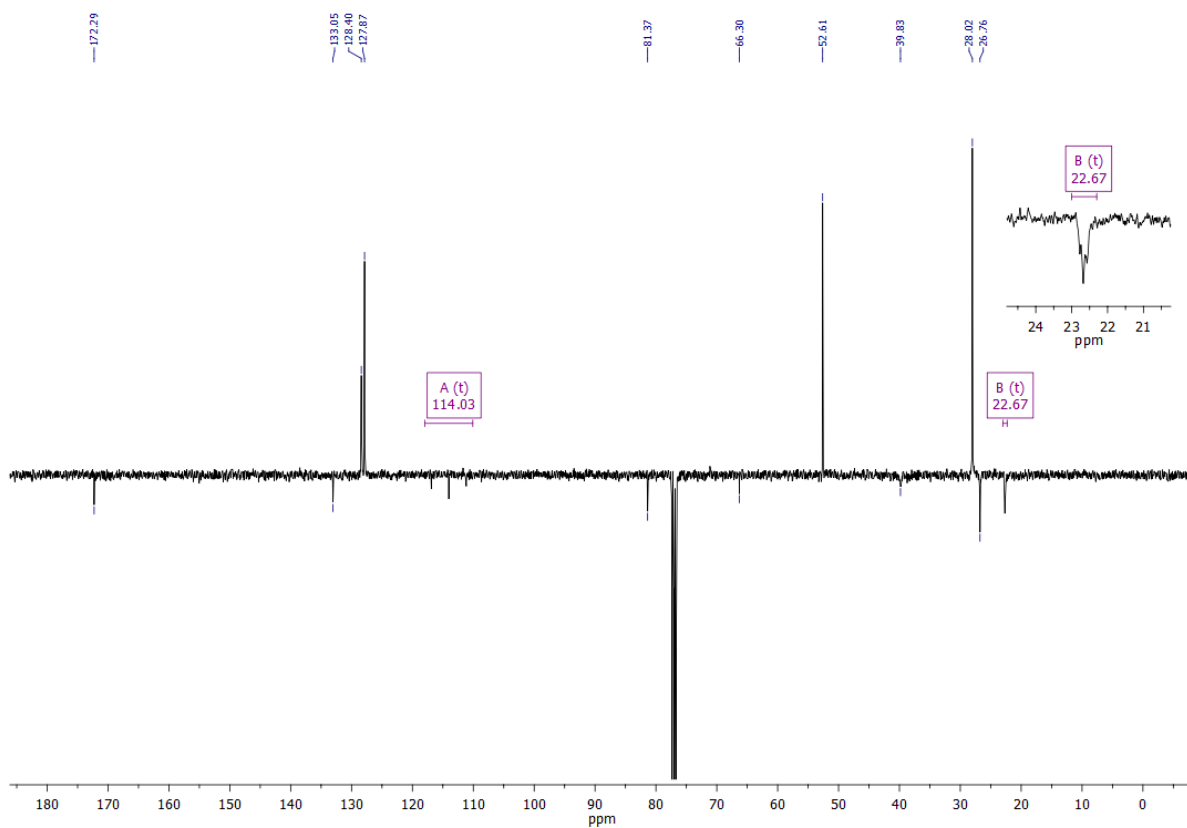



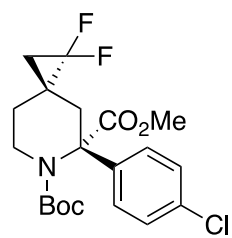

**9c**  
(<sup>19</sup>F NMR)

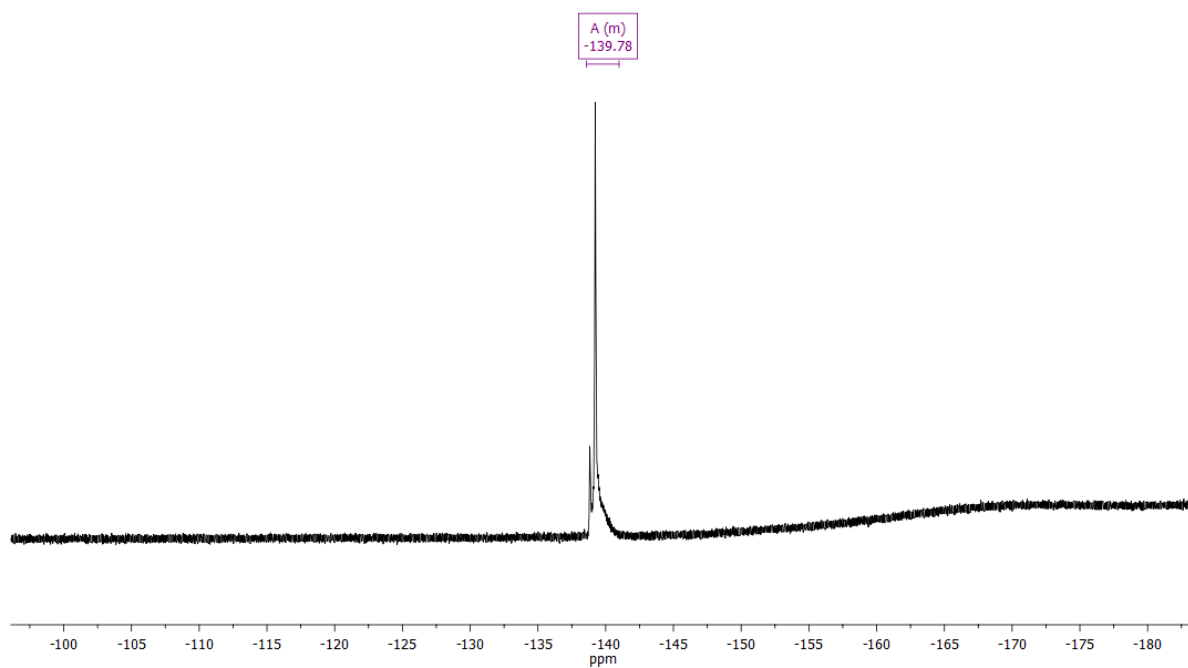

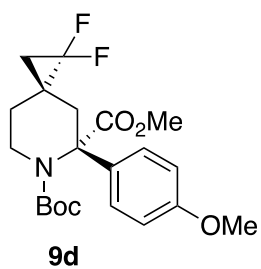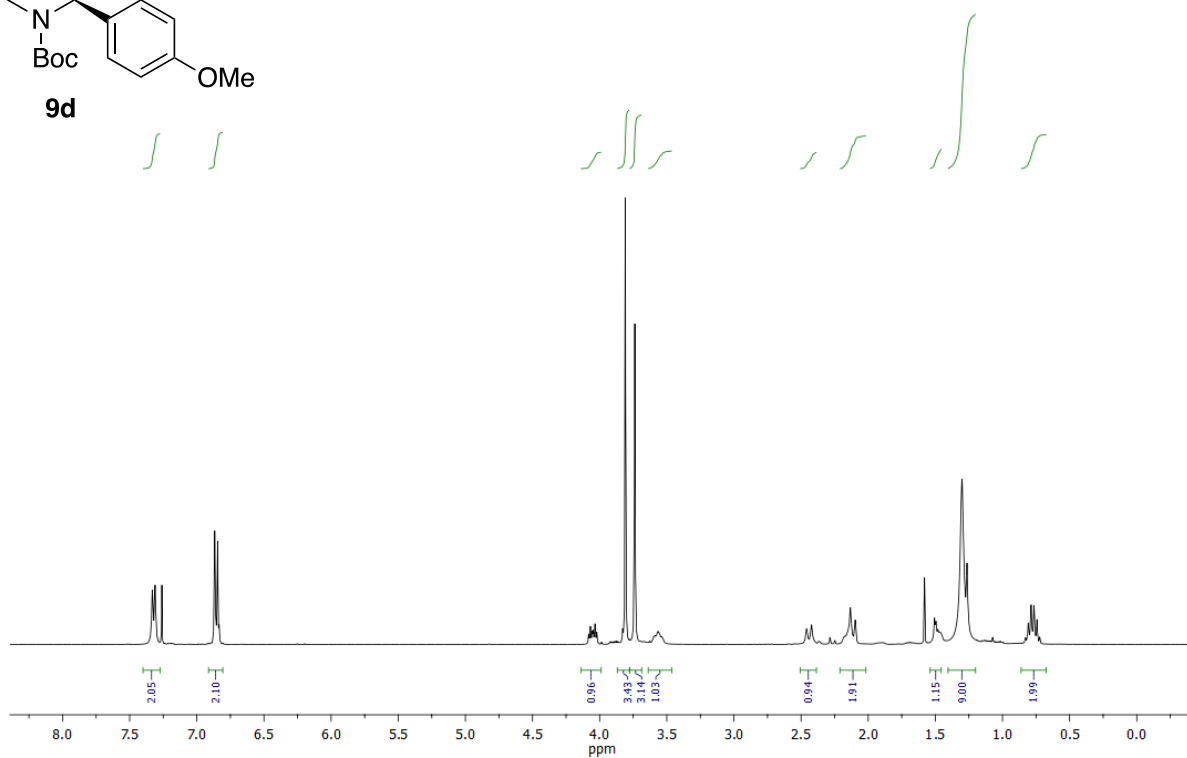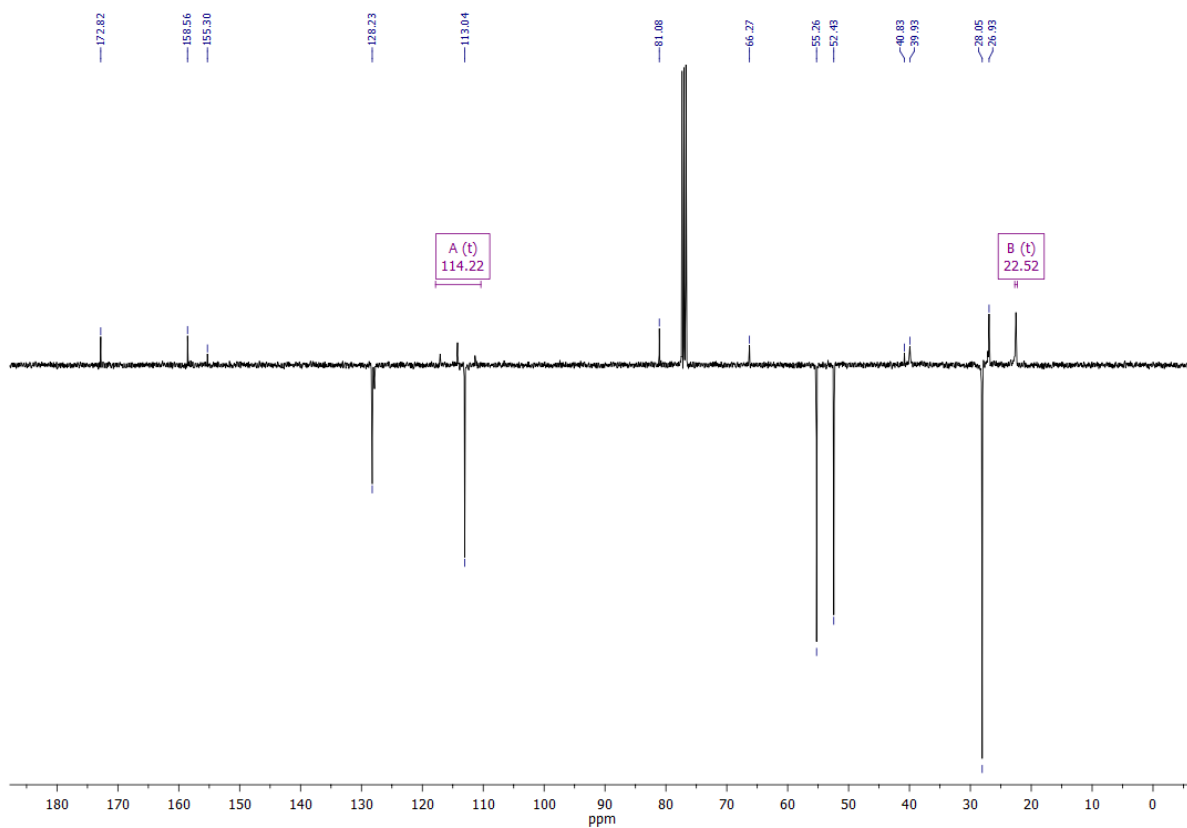

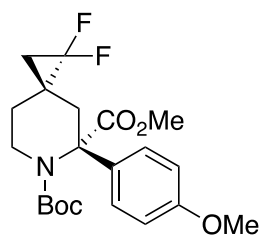

**9d**  
(<sup>19</sup>F NMR)

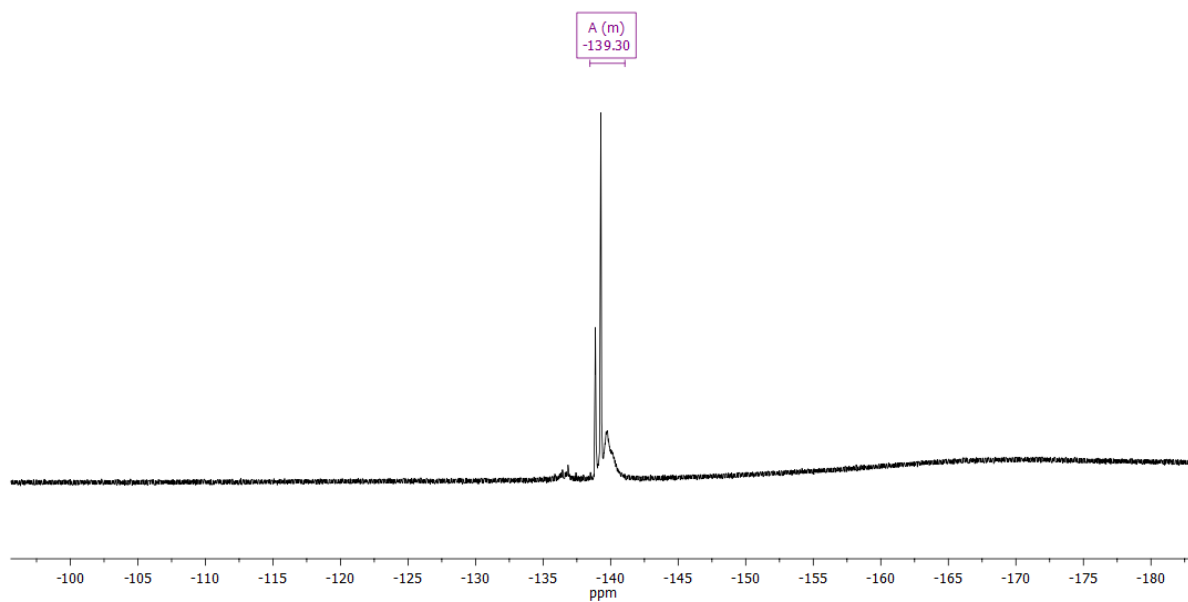

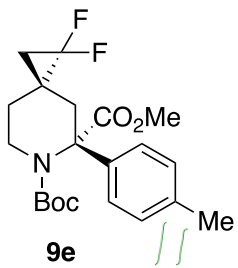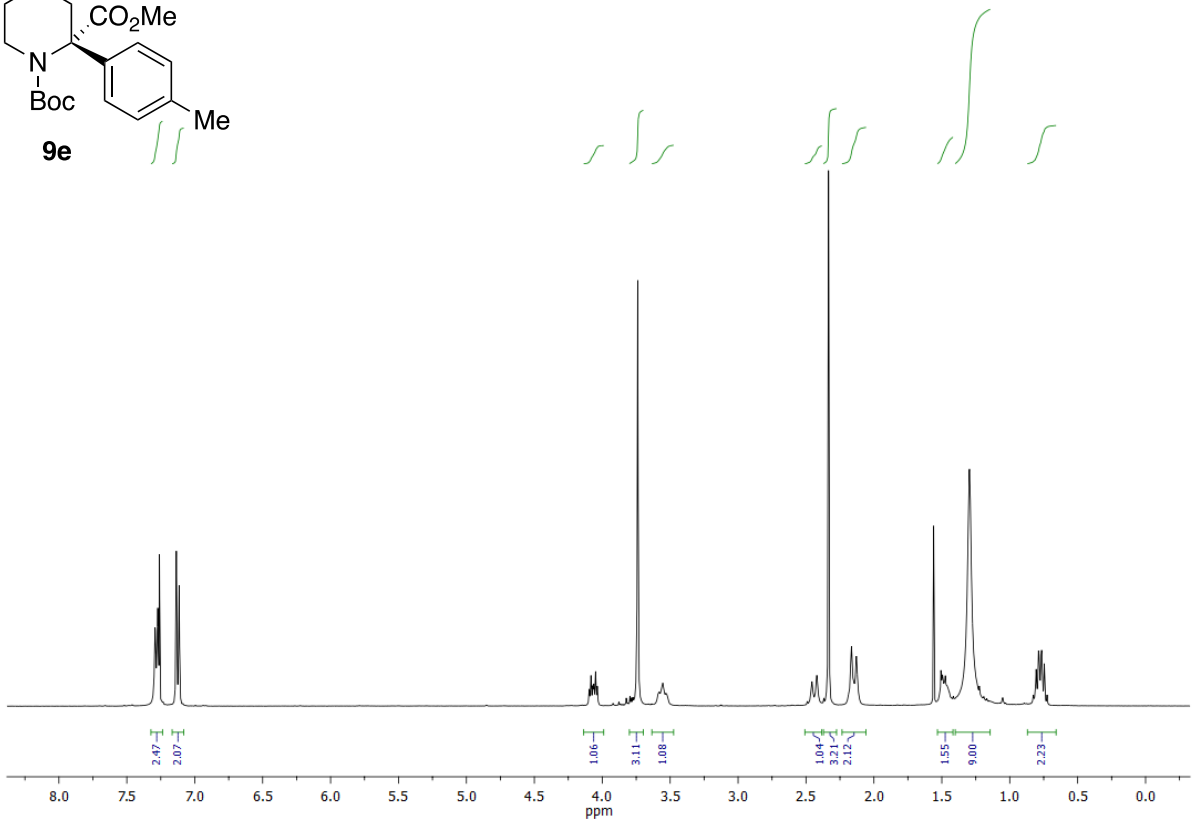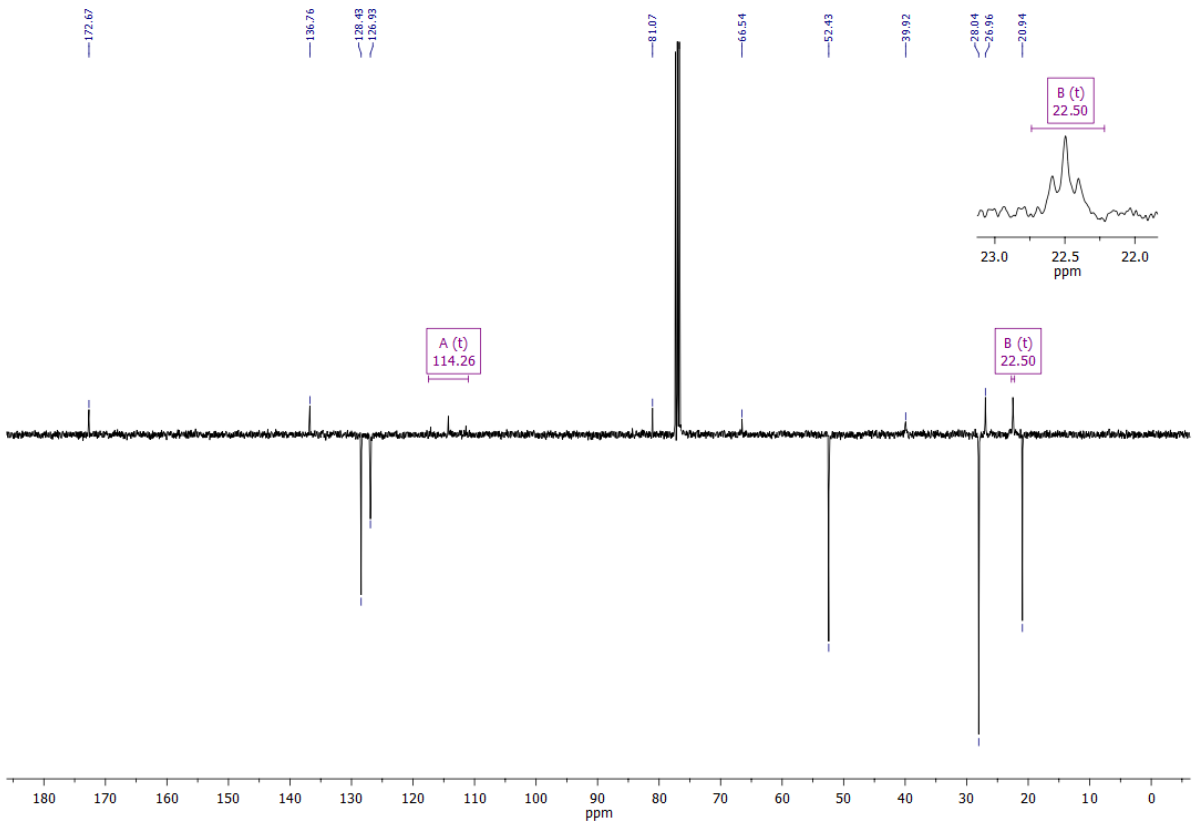

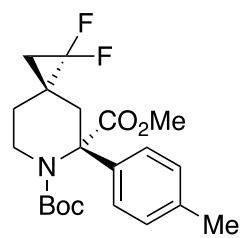

**9e**  
(<sup>19</sup>F NMR)

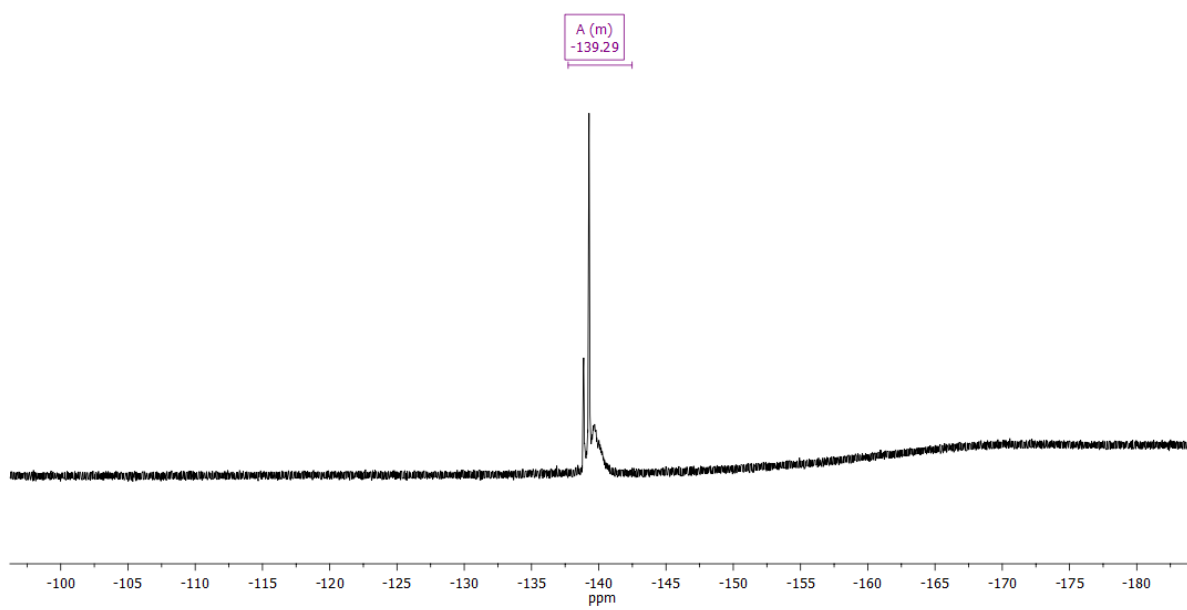

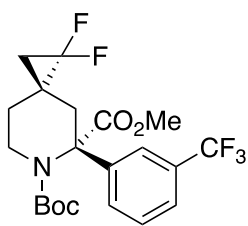

9f

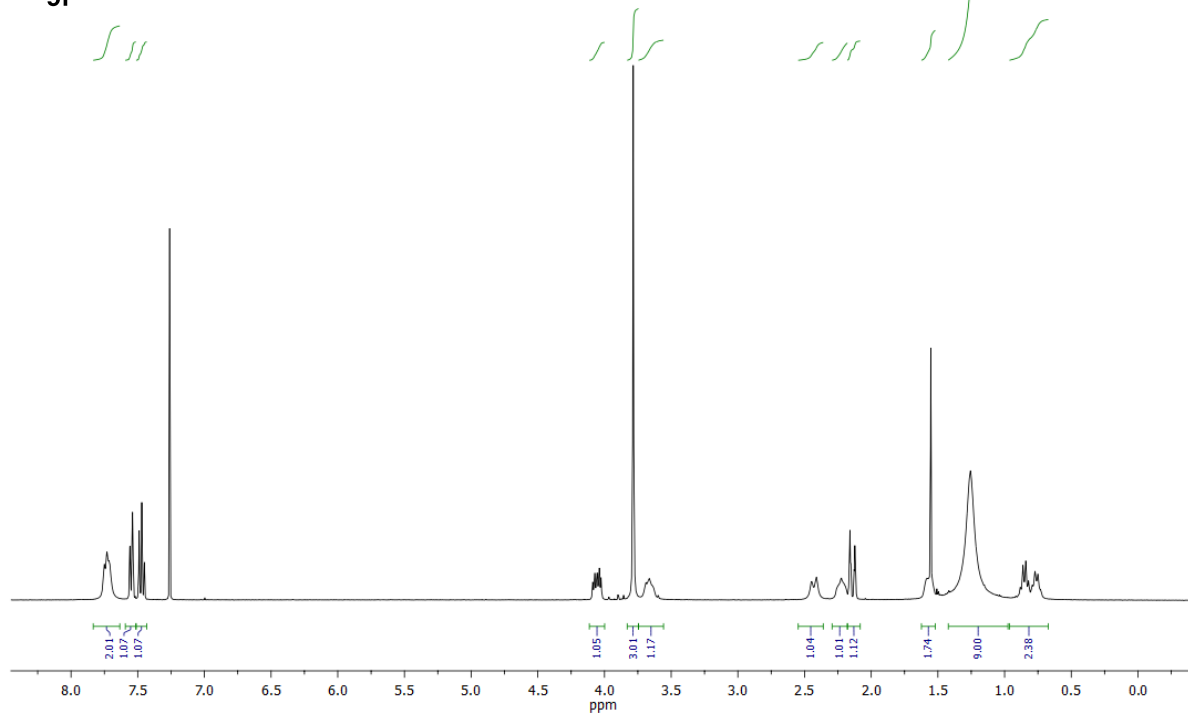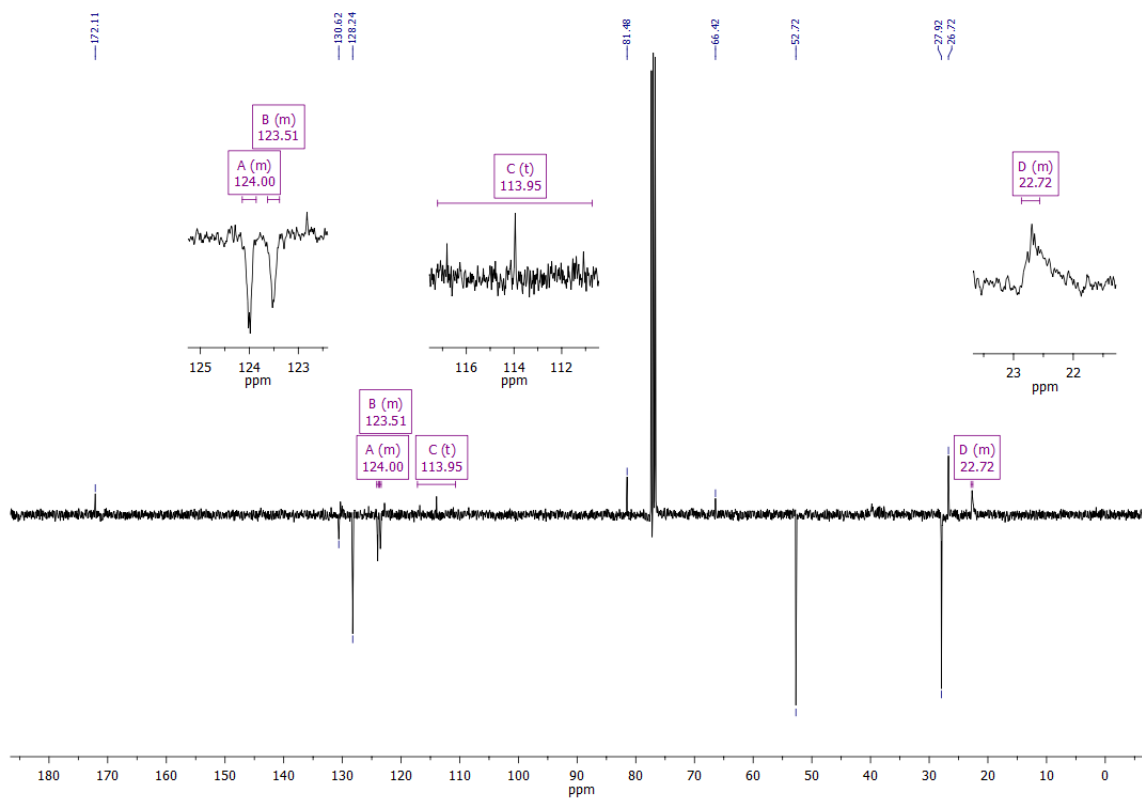

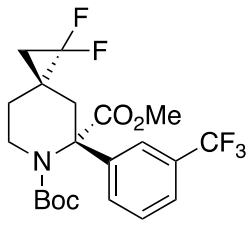

**9f**

(<sup>19</sup>F NMR)

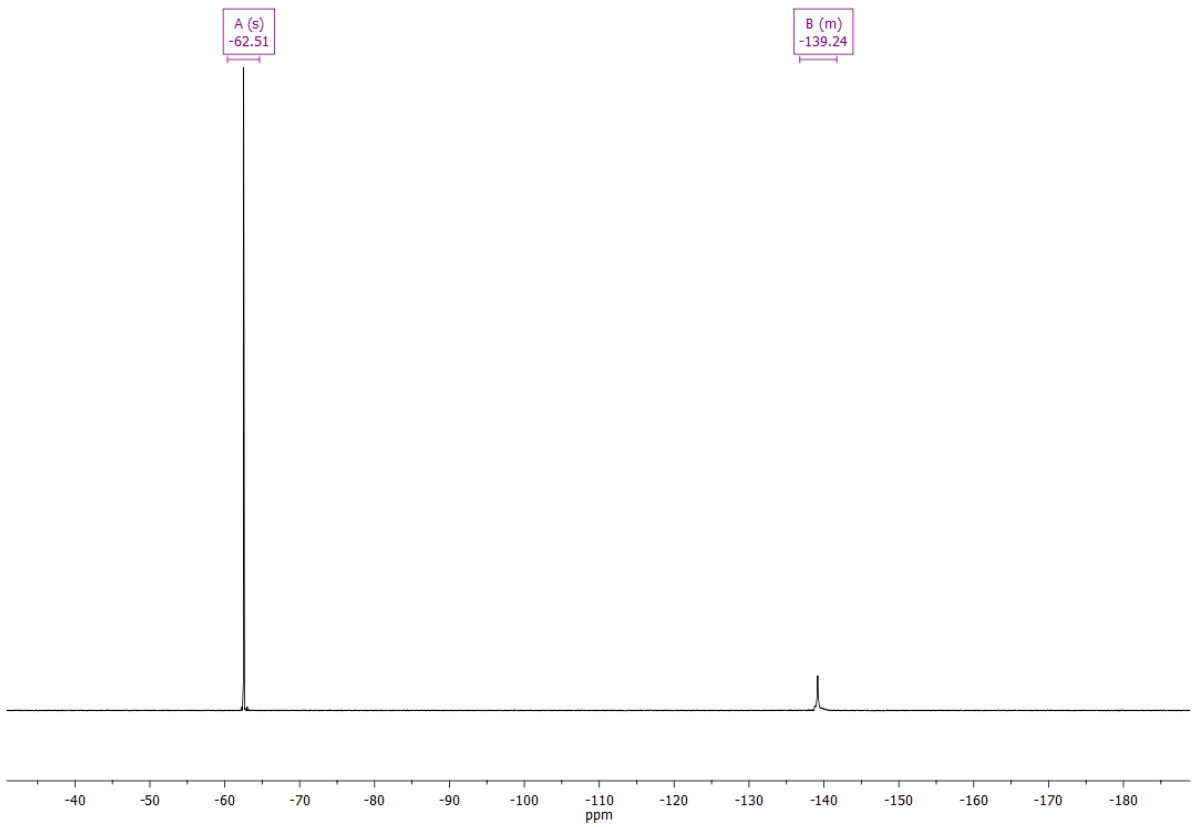

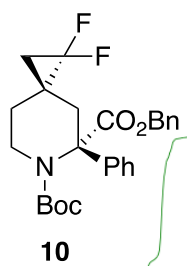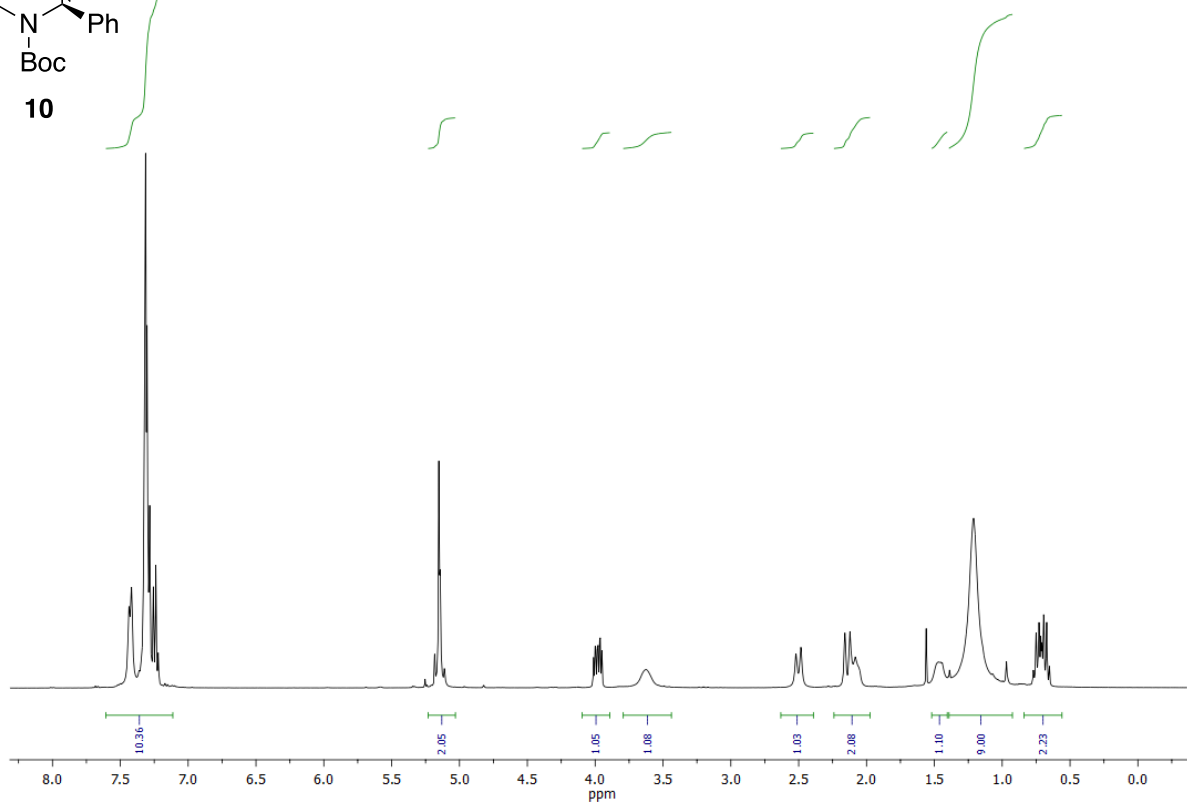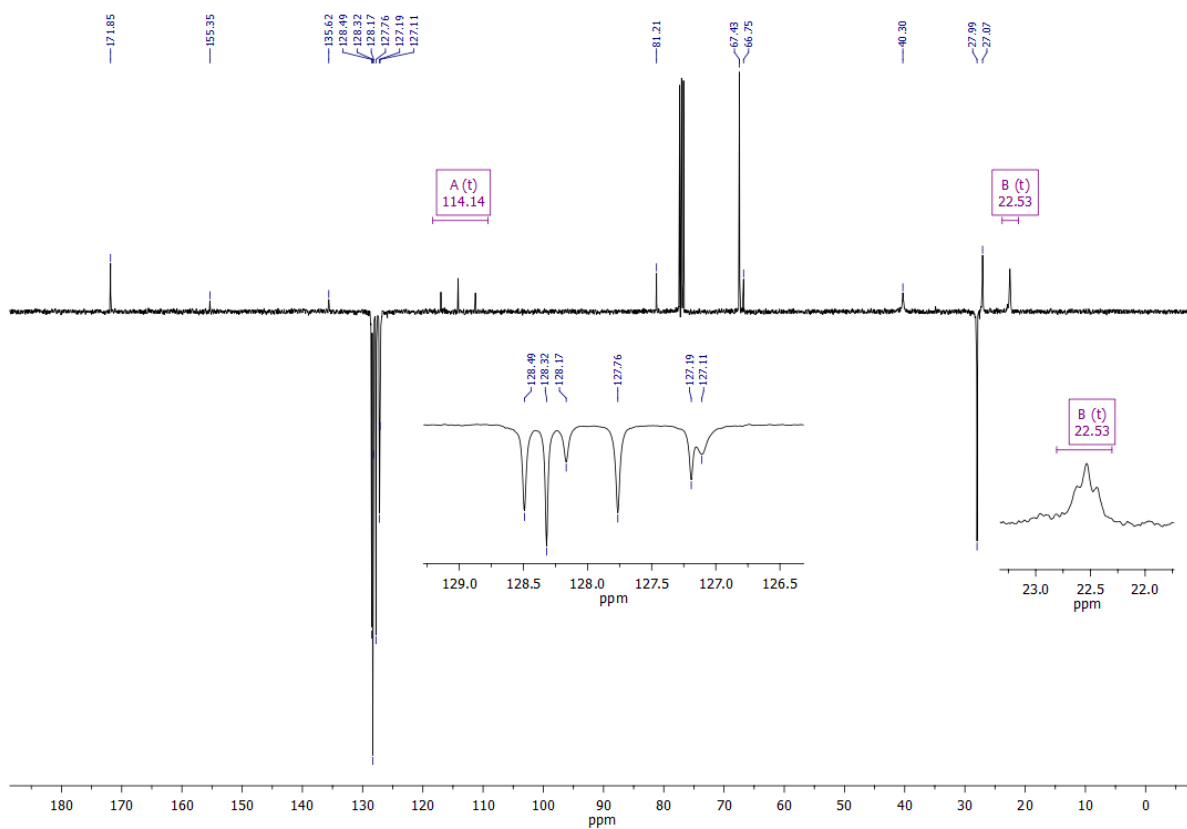



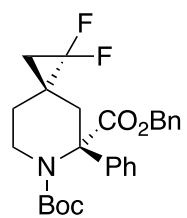

**10**  
(<sup>19</sup>F NMR)

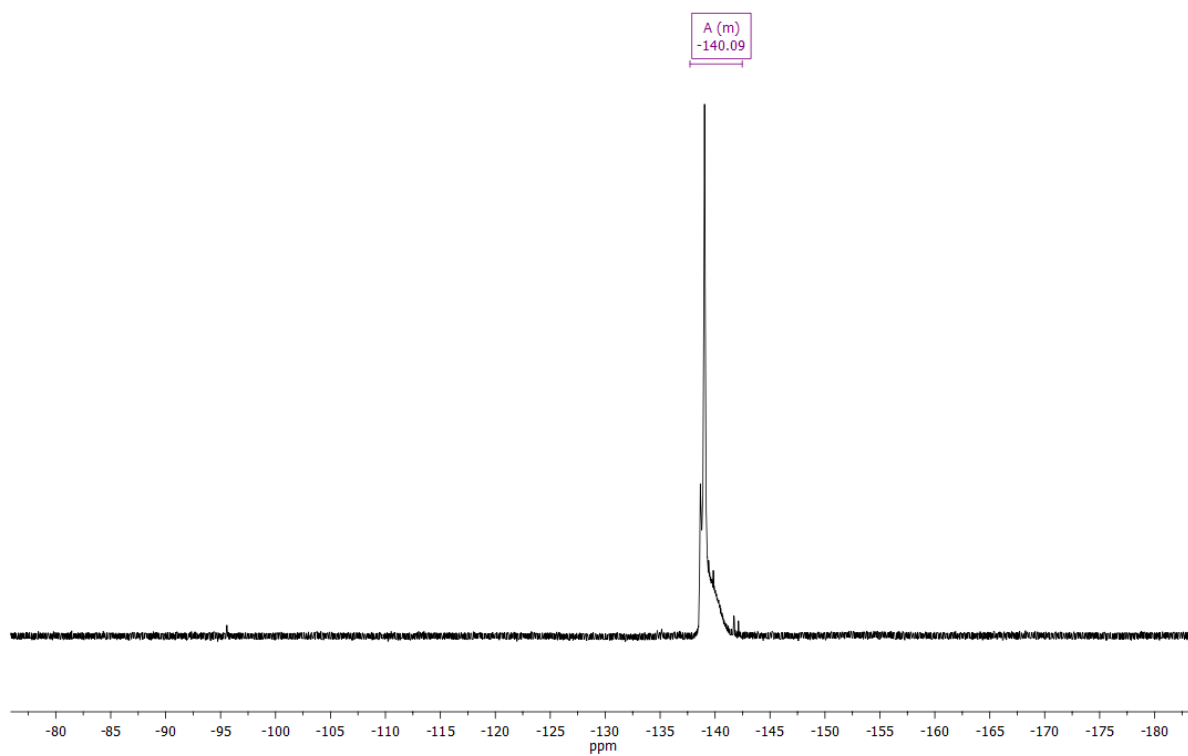

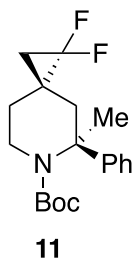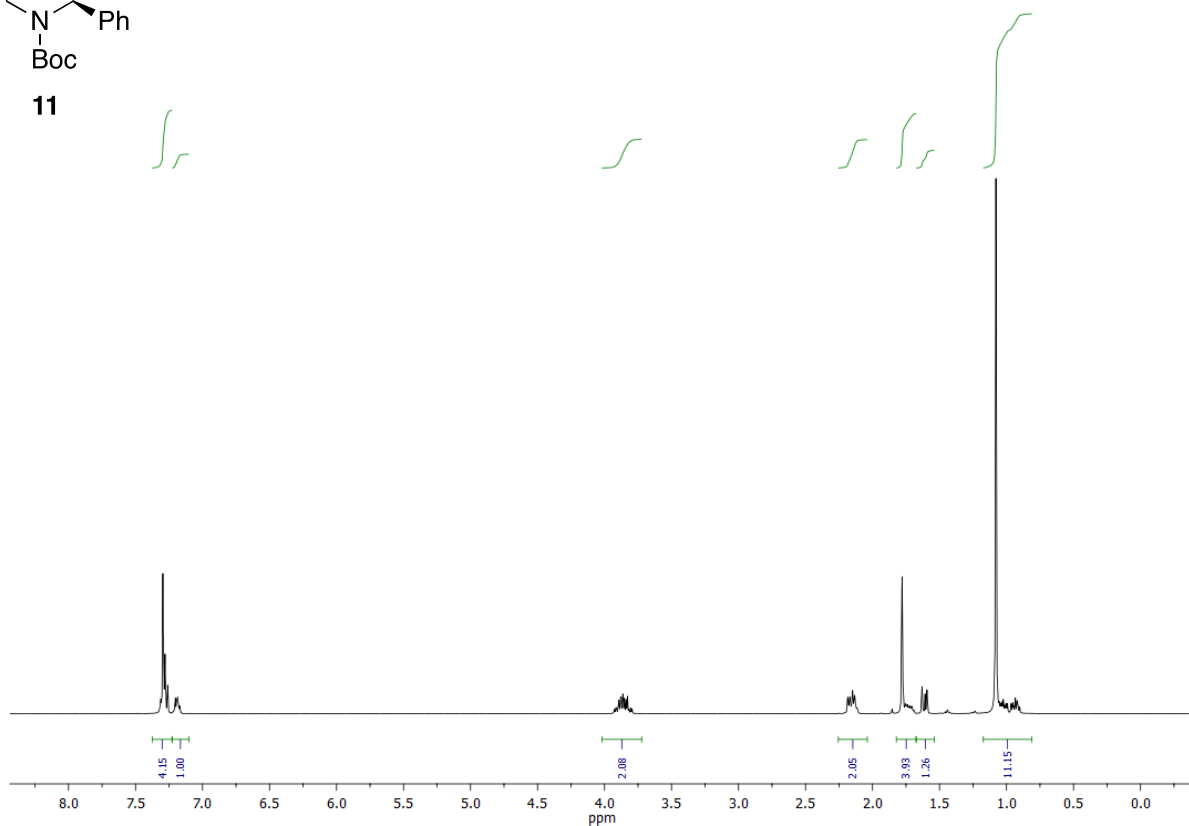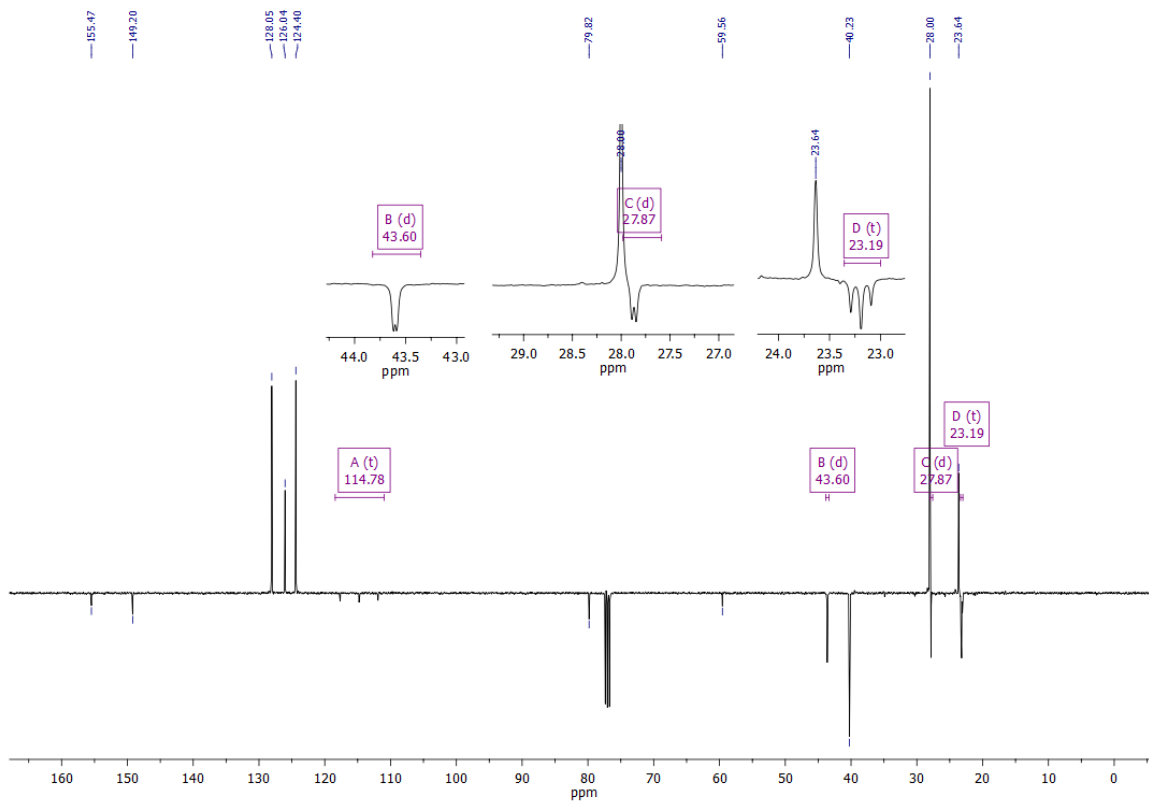

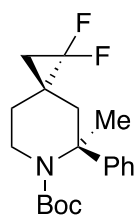

11

(<sup>19</sup>F NMR)

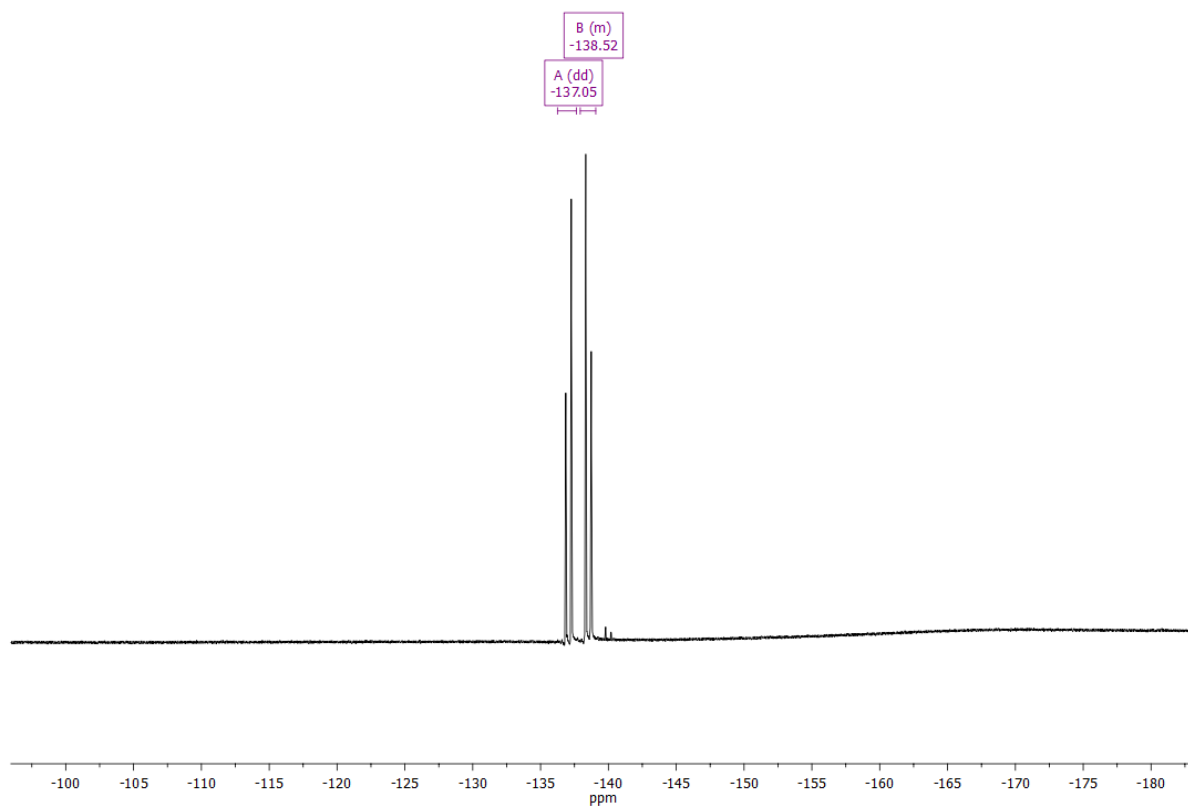

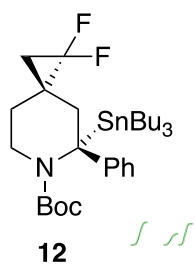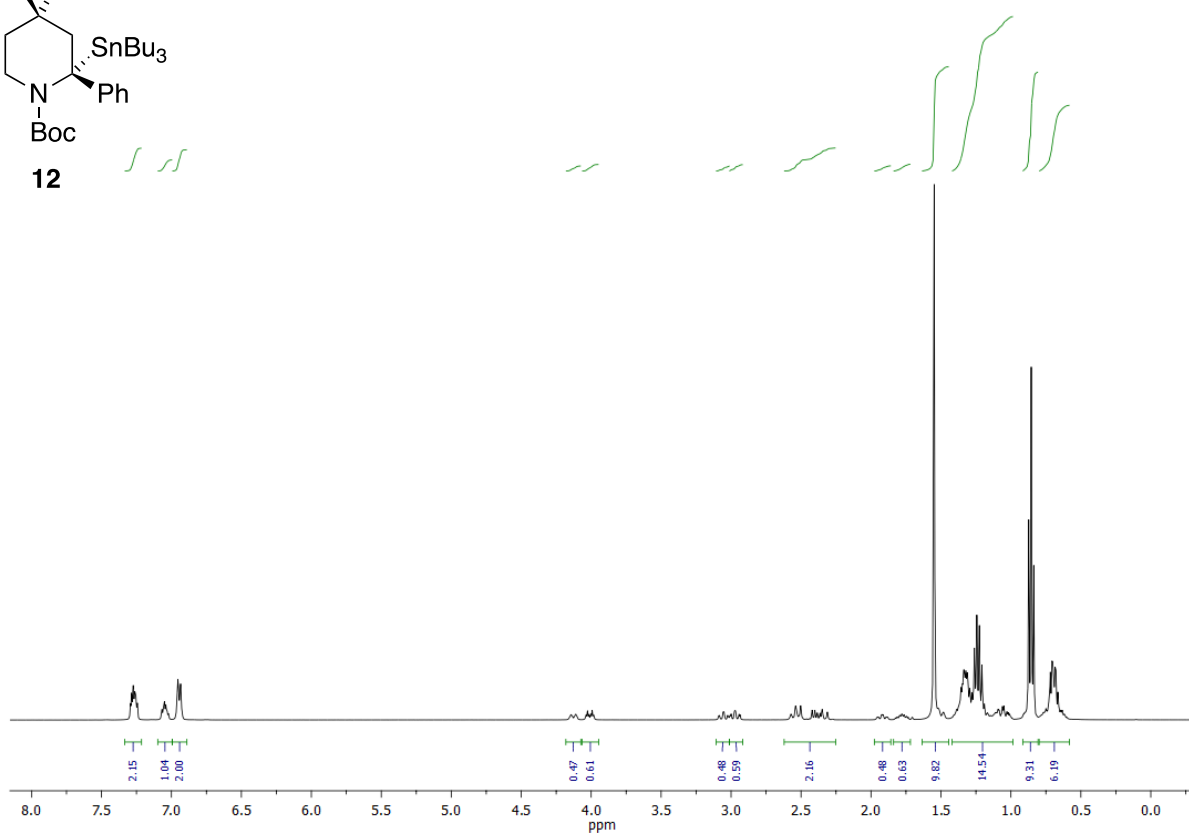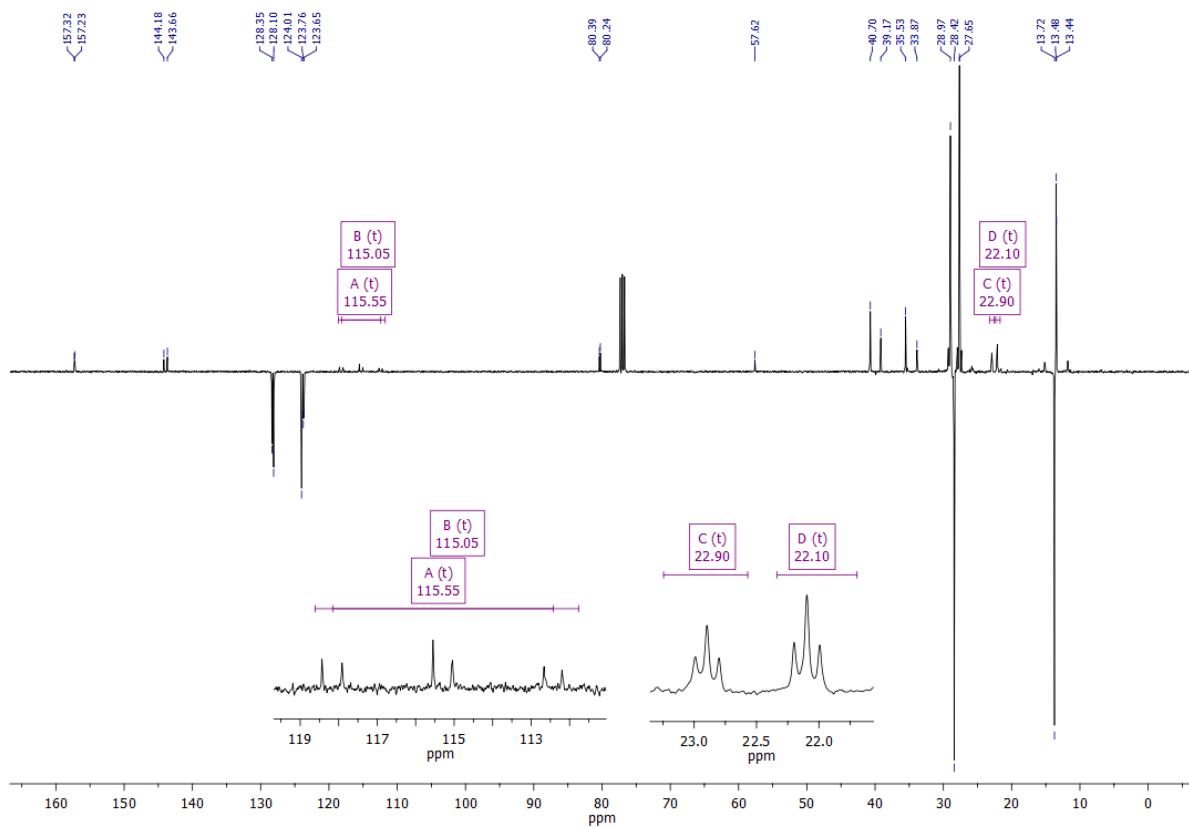

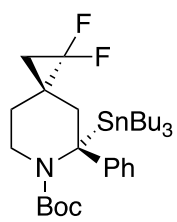

12

(<sup>19</sup>F NMR)

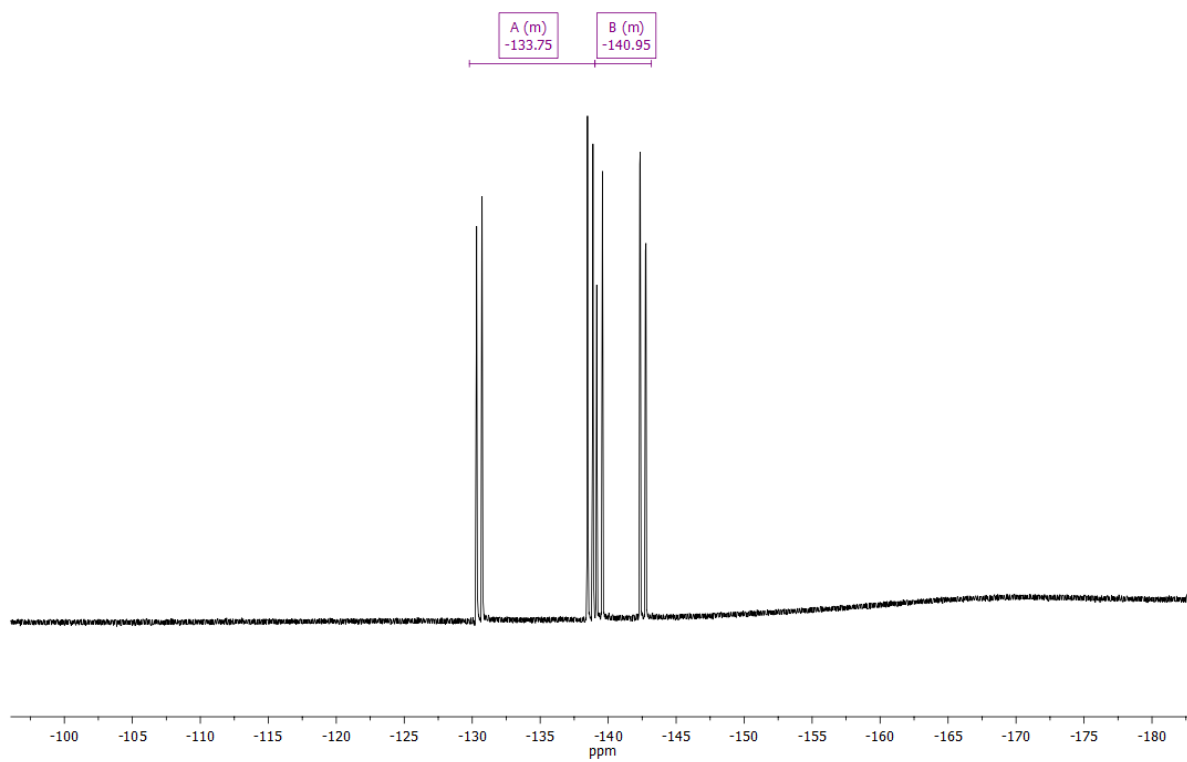

Compound **13** ( $^1\text{H}$  NMR,  $\text{CDCl}_3$ )

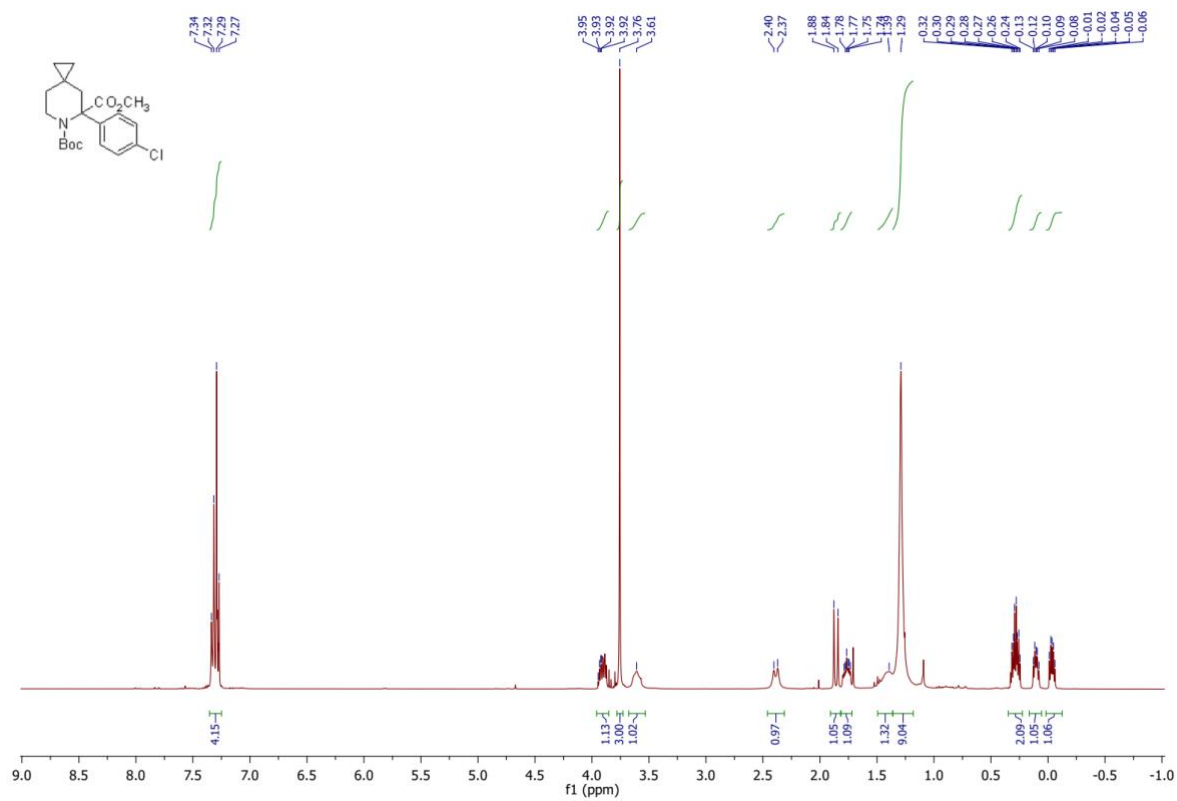

Compound **13** ( $^{13}\text{C}$  NMR,  $\text{CDCl}_3$ )

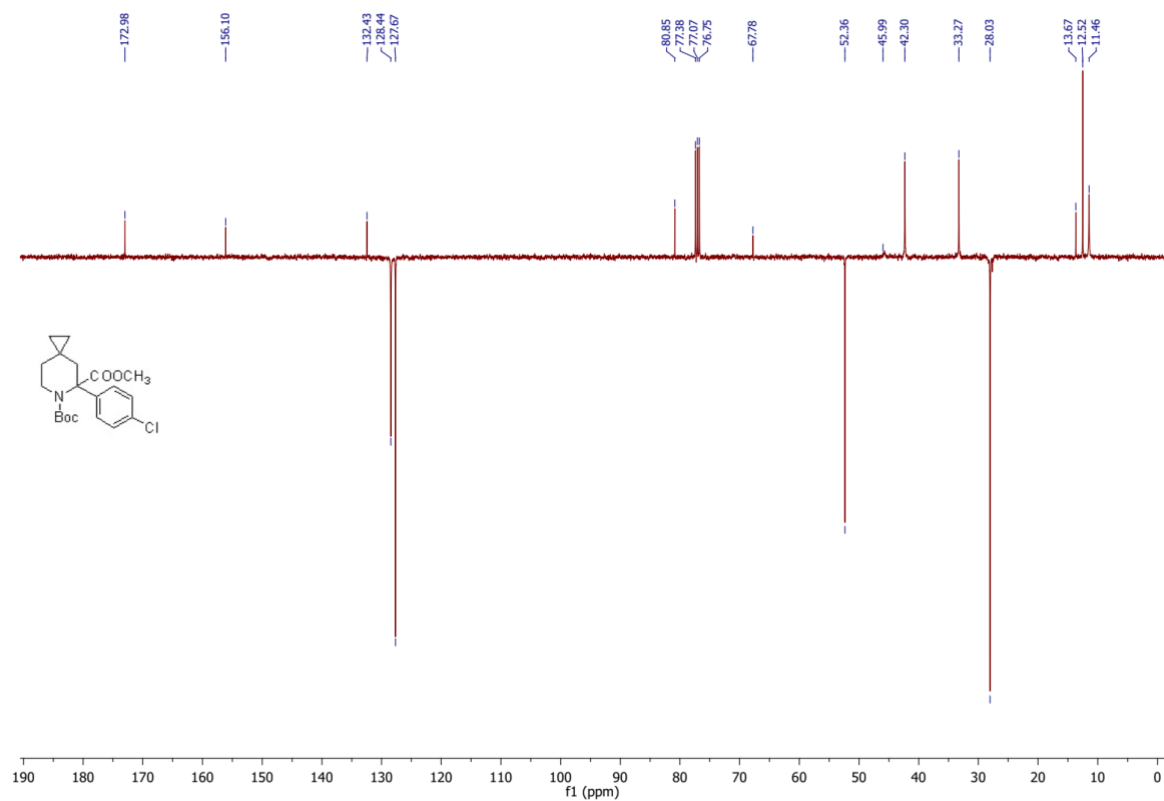

Compound **14** ( $^1\text{H}$  NMR,  $\text{CDCl}_3$ )

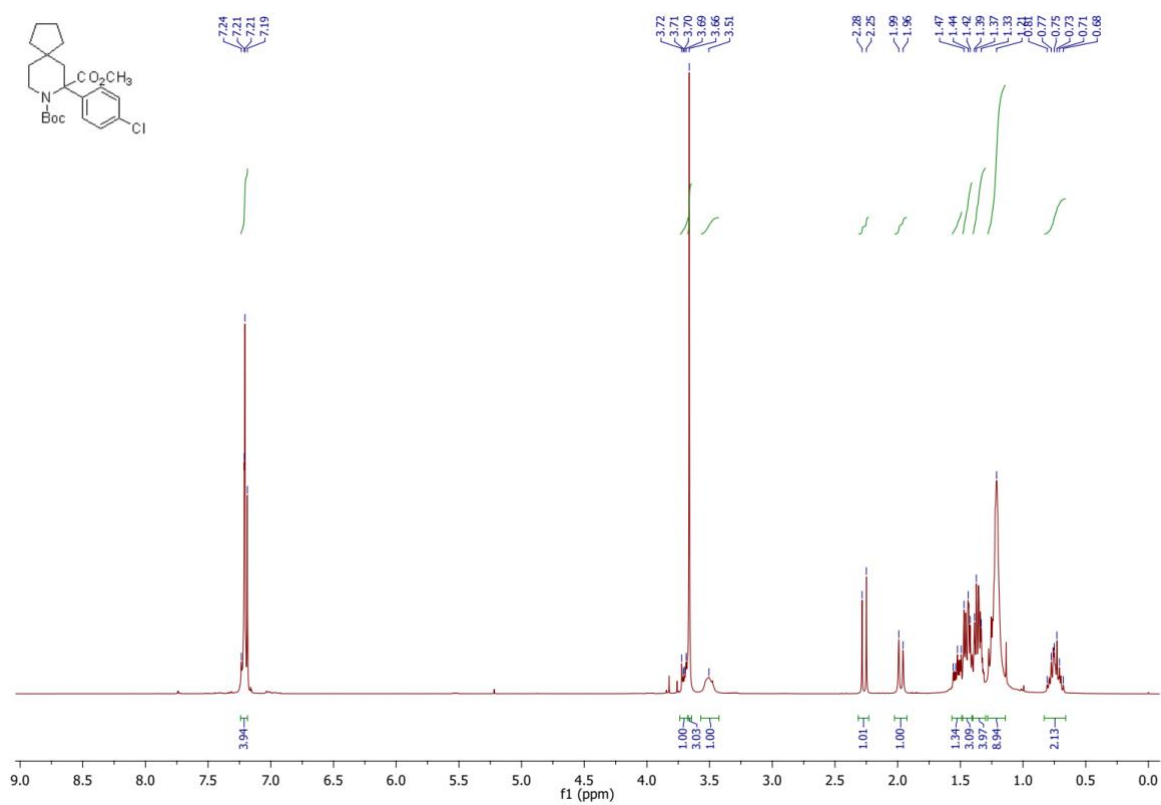

Compound **14** ( $^{13}\text{C}$  NMR,  $\text{CDCl}_3$ )

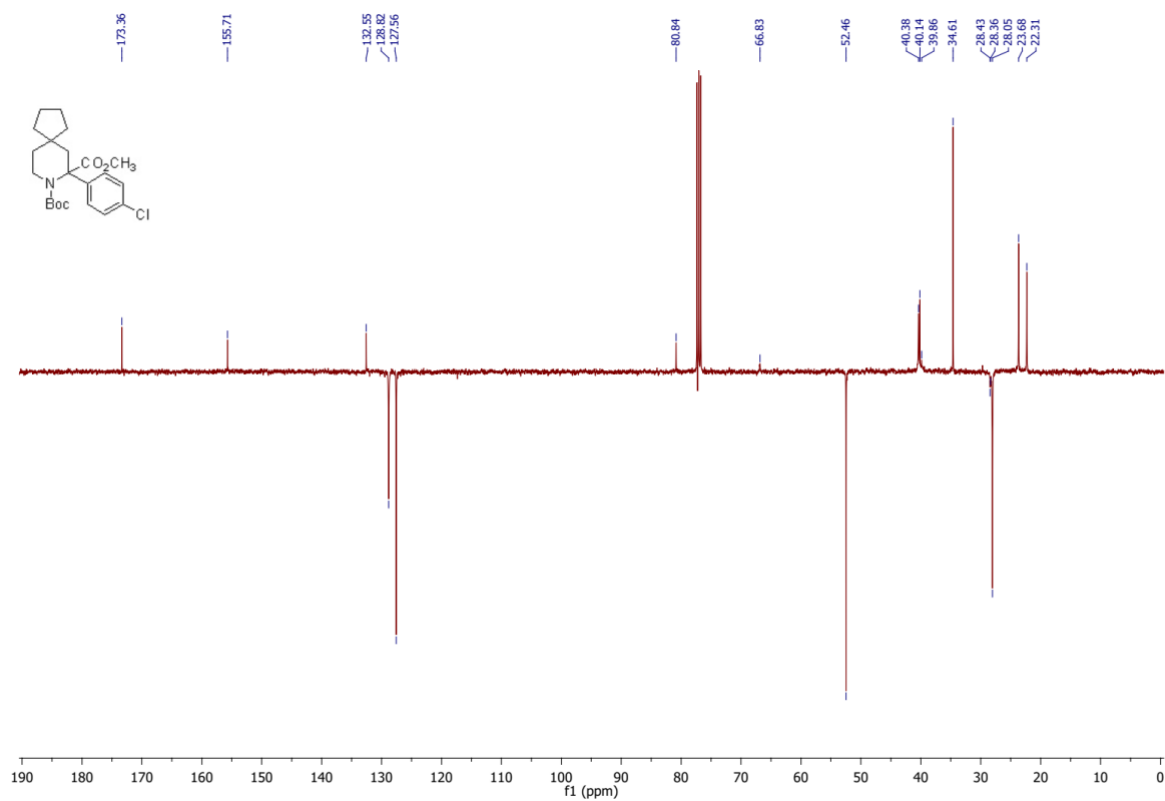

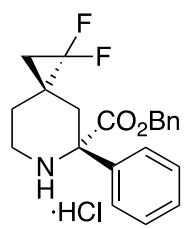

**15**  
[in d<sub>6</sub>-DMSO]

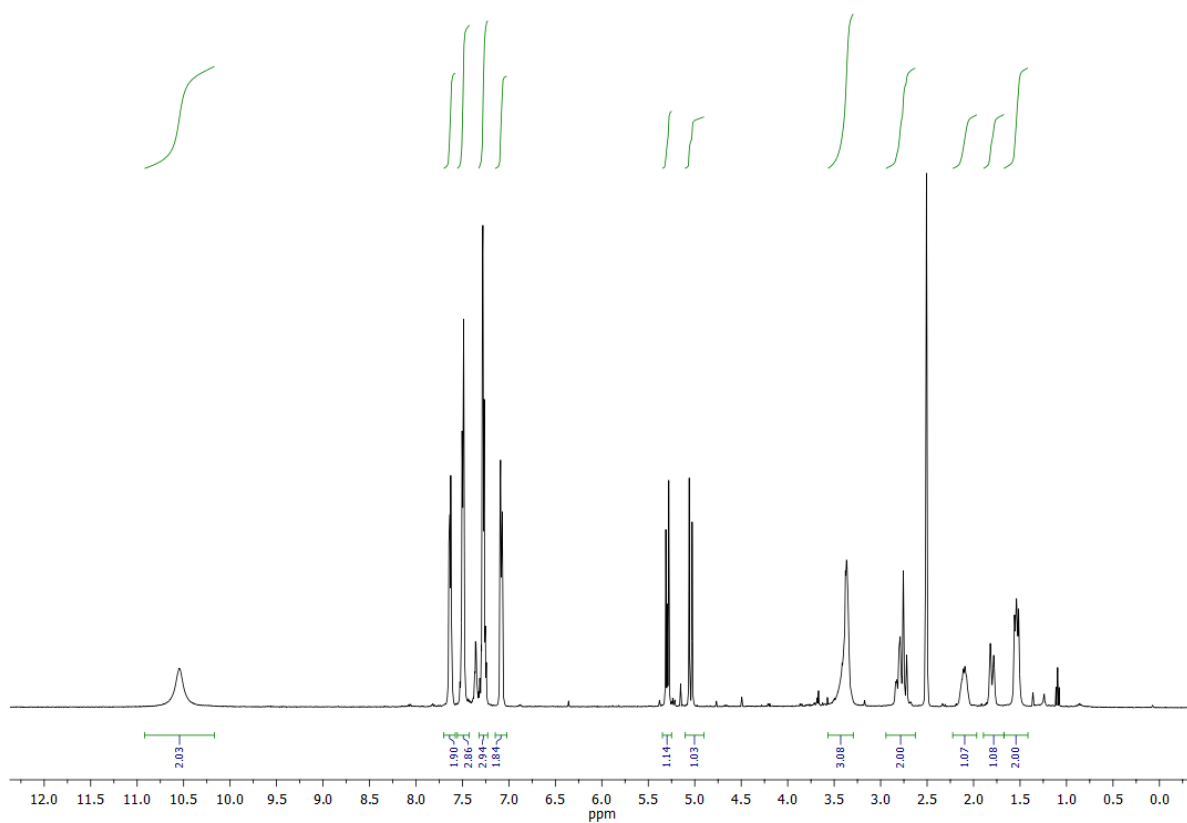



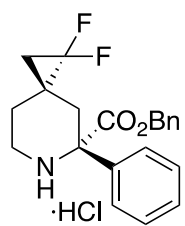

**15**  
[in d<sub>6</sub>-DMSO]

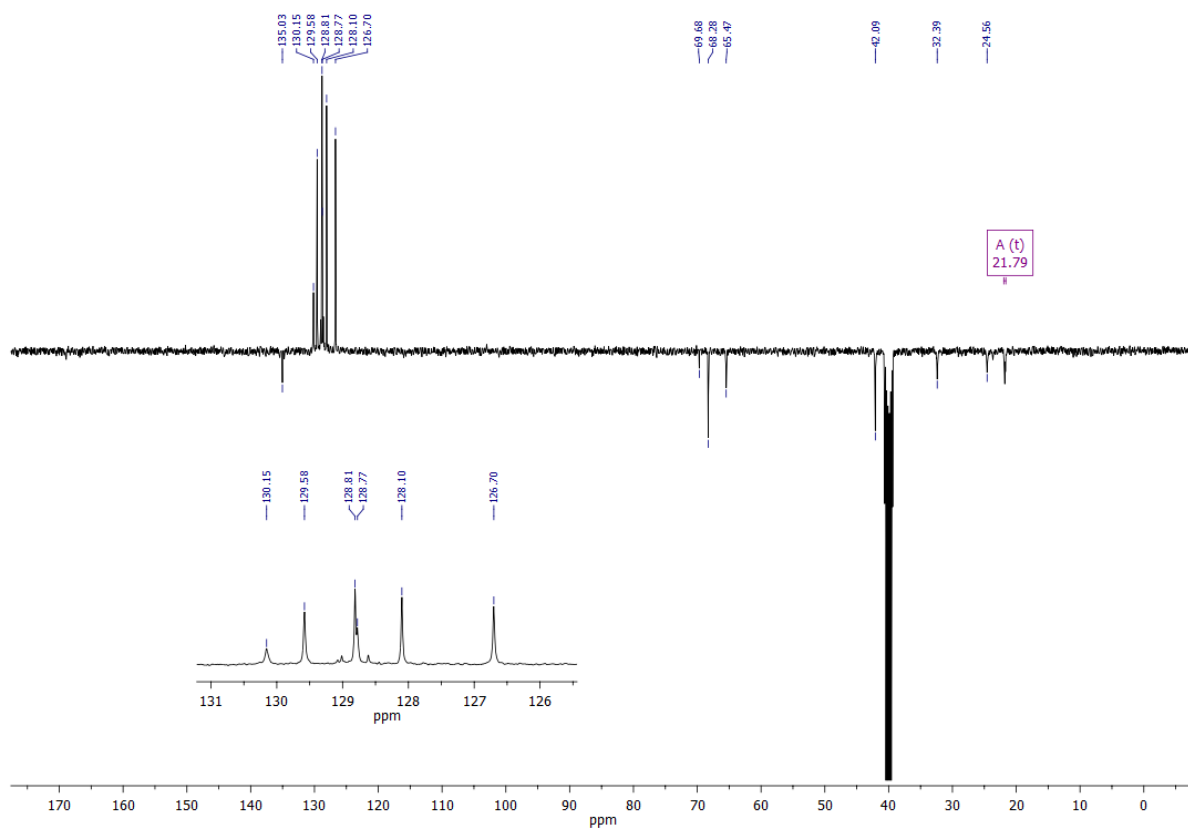



**15**  
[in d<sub>6</sub>-DMSO]

(<sup>19</sup>F NMR)

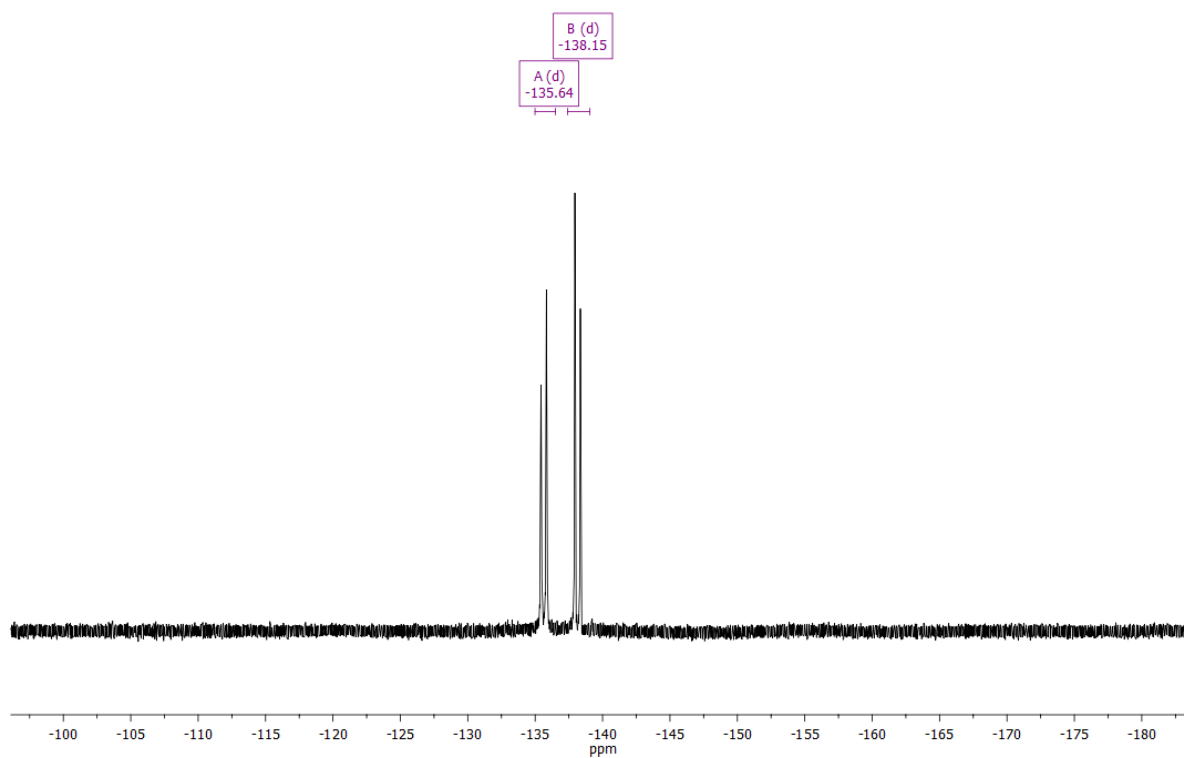

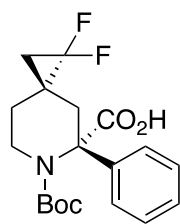

**16**

[in d<sub>6</sub>-DMSO]

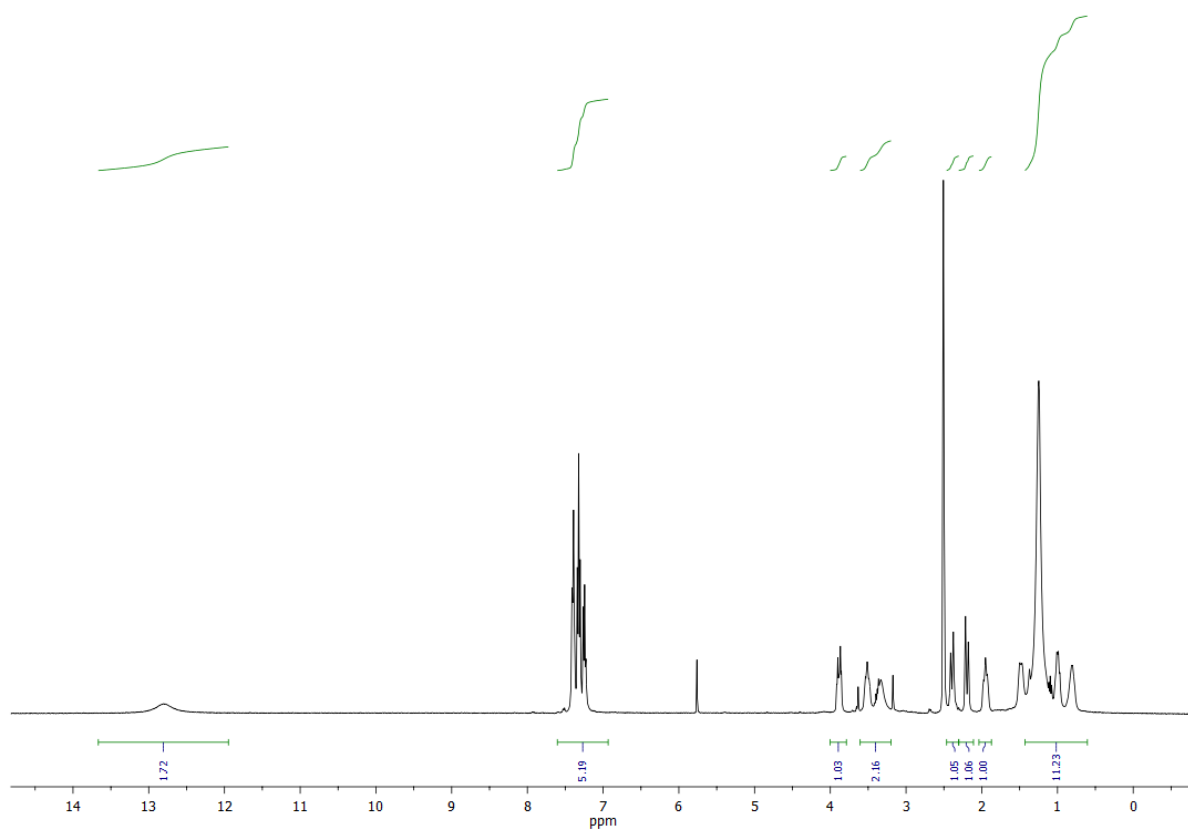

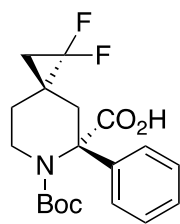

**16**  
[in d<sub>6</sub>-DMSO]

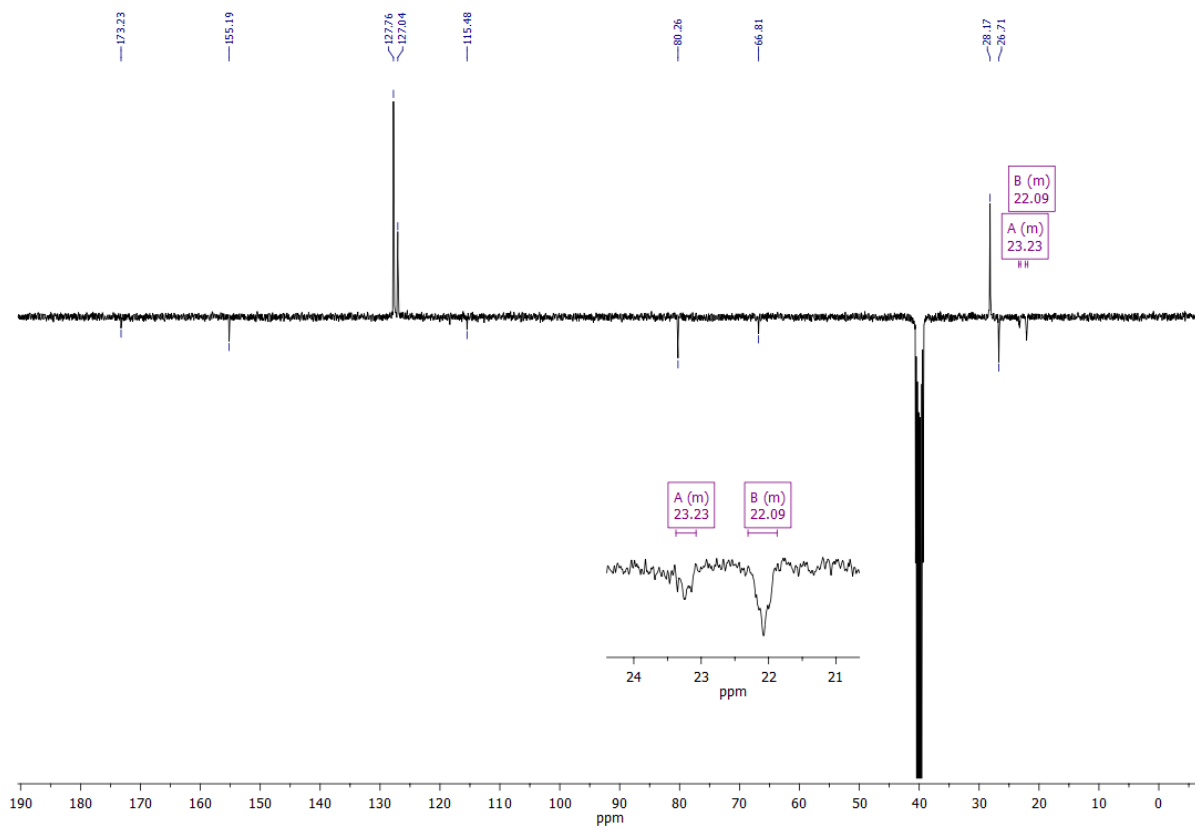

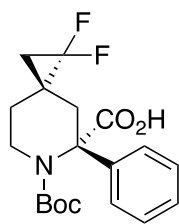

**16**

[in d<sub>6</sub>-DMSO]

(<sup>19</sup>F NMR)

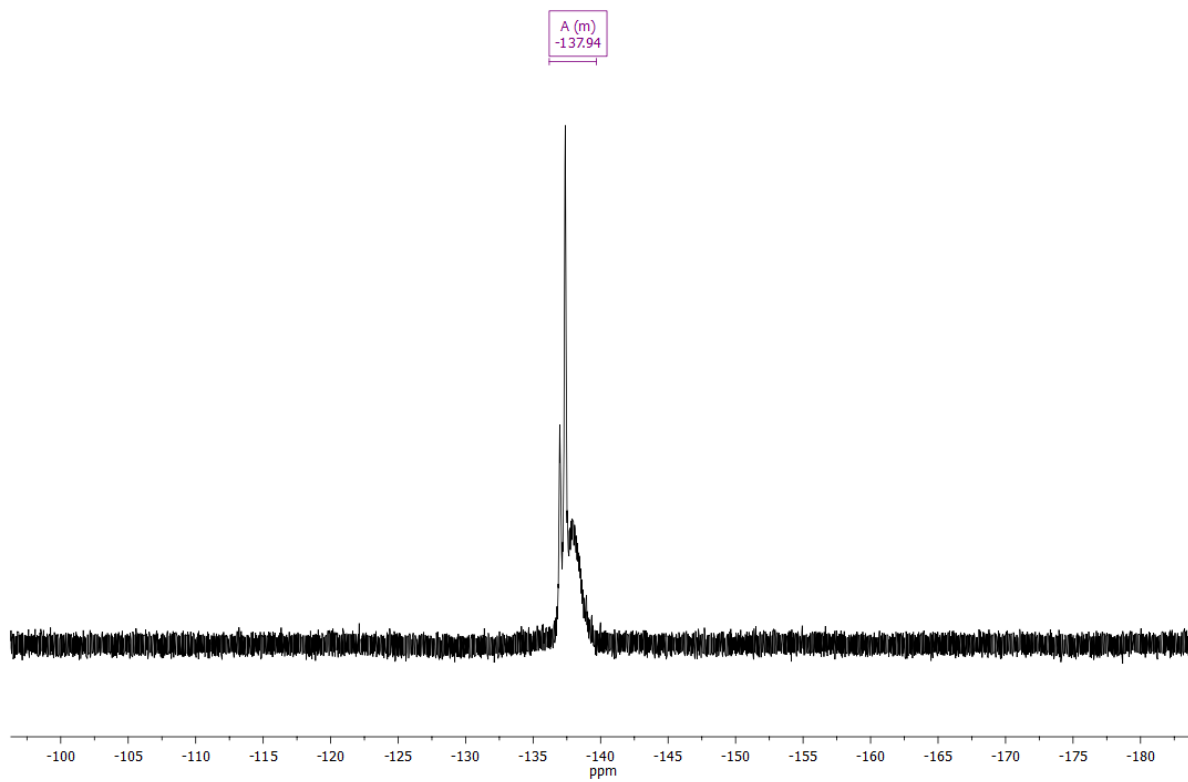

## 8. HPLC traces

HPLC of ( $\pm$ )-**2a** from Agilent system fitted with a CHIRAL ART Cellulose-SC column:

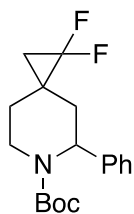

|   | R <sub>t</sub> /min | Area       | Area/% |
|---|---------------------|------------|--------|
| 1 | 6.886               | 15248.6781 | 49.93  |
| 2 | 8.387               | 15292.9410 | 50.07  |
|   | Total               | 30541.6191 | 100.00 |

( $\pm$ )-**2a**

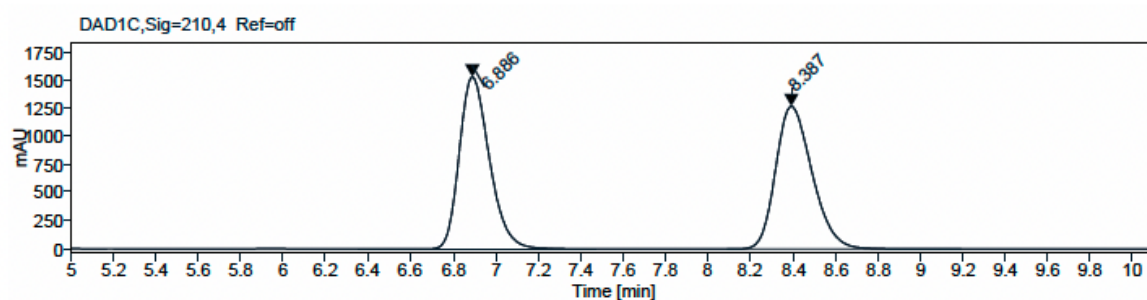

HPLC of (3*S*,5*S*)-**2a** (er 97:3) from Agilent system fitted with a CHIRAL ART Cellulose-SC column:

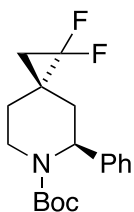

|   | R <sub>t</sub> /min | Area       | Area/% |
|---|---------------------|------------|--------|
| 1 | 6.917               | 499.6881   | 2.95   |
| 2 | 8.369               | 16453.7999 | 97.05  |
|   | Total               | 16953.4881 | 100.00 |

(3*S*,5*S*)-**2a**  
(er 97:3)

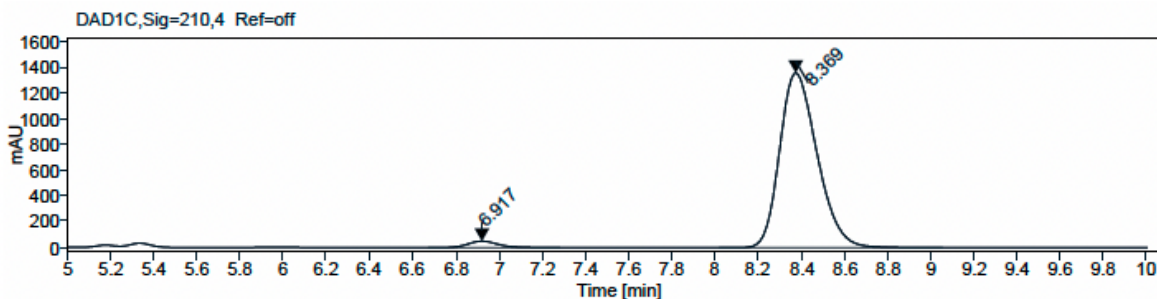

HPLC of (3S,5S)-**2a** (er 99:1) from Agilent system fitted with a CHIRAL ART Cellulose-SC column:

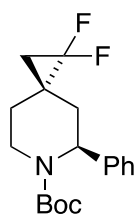

|   | R <sub>t</sub> /min | Area       | Area/% |
|---|---------------------|------------|--------|
| 1 | 6.969               | 198.8356   | 0.60   |
| 2 | 8.382               | 32831.4113 | 99.40  |
|   | Total               | 33030.2469 | 100.00 |

(3S,5S)-**2a**  
(er 99:1)

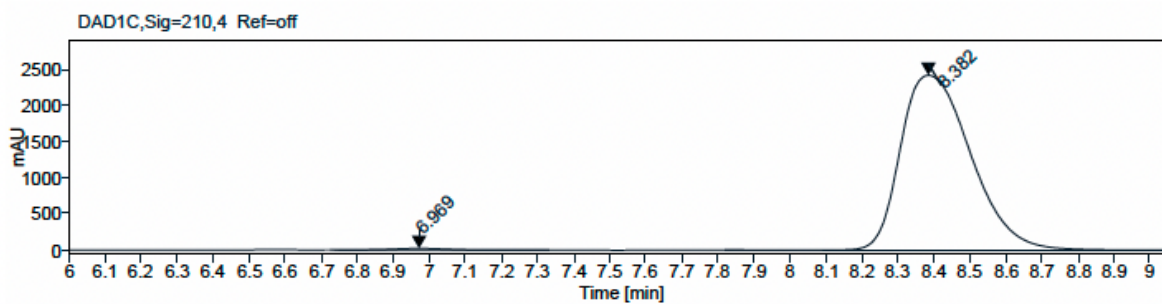

HPLC of (±)-**2b** from Agilent system fitted with a CHIRAL ART Cellulose-SC column:

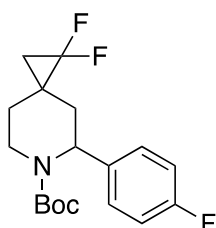

|   | R <sub>t</sub> /min | Area       | Area/% |
|---|---------------------|------------|--------|
| 1 | 7.459               | 10577.5933 | 50.01  |
| 2 | 9.118               | 10572.3395 | 49.99  |
|   | Total               | 21149.9328 | 100.00 |

(±)-**2b**

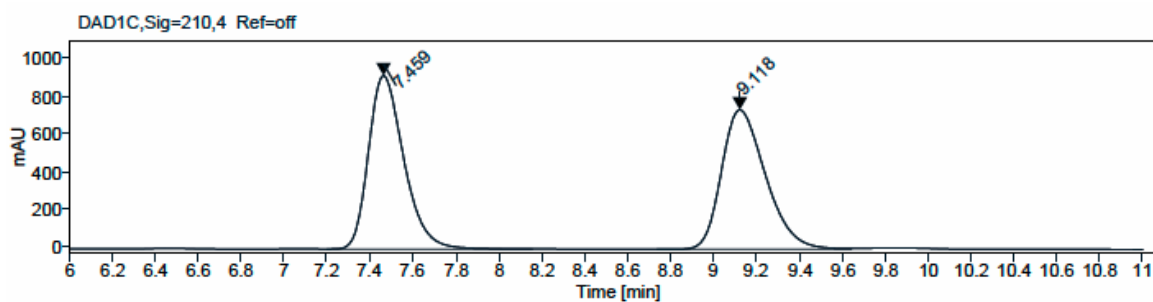

HPLC of (3S,5S)-**2b** (er 99:1) from Agilent system fitted with a CHIRAL ART Cellulose-SC column:

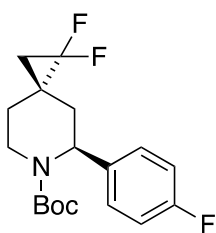

|   | R <sub>t</sub> /min | Area       | Area/% |
|---|---------------------|------------|--------|
| 1 | 7.602               | 191.2280   | 1.25   |
| 2 | 9.225               | 15068.7051 | 98.75  |
|   | Total               | 15259.9332 | 100.00 |

(3S,5S)-**2b**  
(er 99:1)

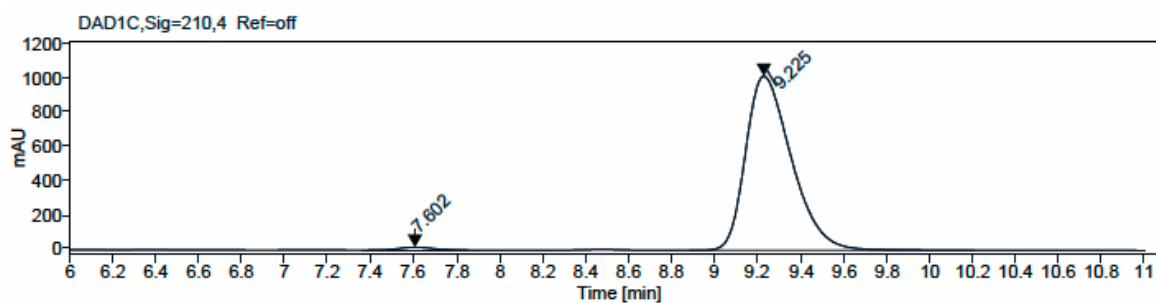

HPLC of (±)-**2c** from Agilent system fitted with a CHIRAL ART Cellulose-SC column:

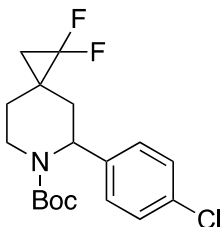

|   | R <sub>t</sub> /min | Area       | Area/% |
|---|---------------------|------------|--------|
| 1 | 6.889               | 6359.6704  | 49.90  |
| 2 | 8.286               | 6384.5720  | 50.10  |
|   | Total               | 12744.2424 | 100.00 |

(±)-**2c**

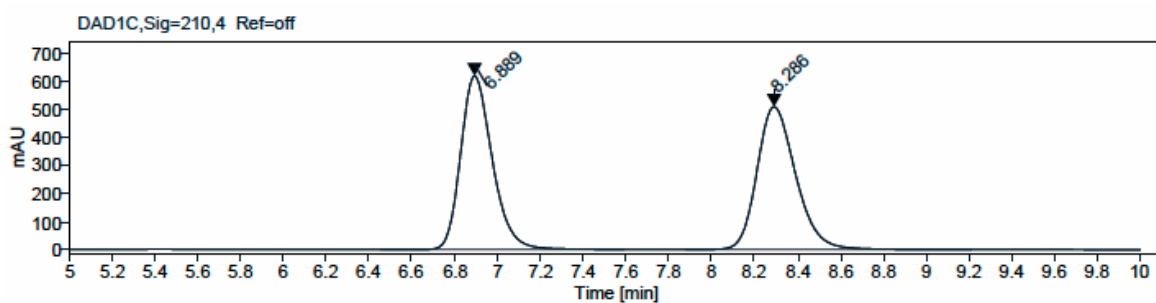



HPLC of (3S,5S)-**2c** (er 94:6) from Agilent system fitted with a CHIRAL ART Cellulose-SC column:

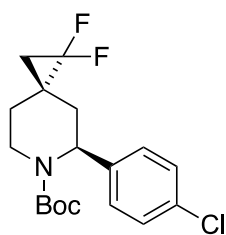

|   | R <sub>t</sub> /min | Area      | Area/% |
|---|---------------------|-----------|--------|
| 1 | 7.099               | 549.0053  | 6.39   |
| 2 | 8.508               | 8040.1616 | 93.61  |
|   | Total               | 8589.1669 | 100.00 |

(3S,5S)-**2c**  
(er 94:6)

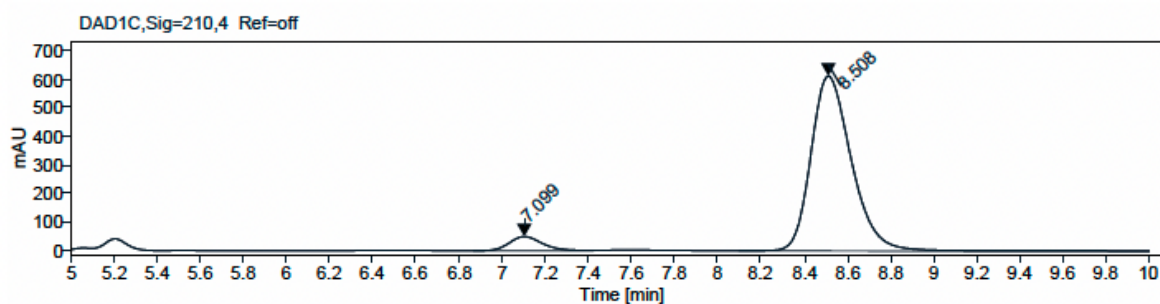

HPLC of (3S,5S)-**2c** (er 99:1) from Agilent system fitted with a CHIRAL ART Cellulose-SC column:

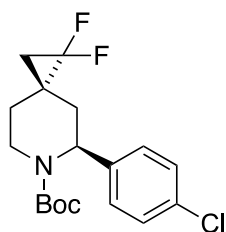

|   | R <sub>t</sub> /min | Area       | Area/% |
|---|---------------------|------------|--------|
| 1 | 7.057               | 145.2179   | 0.50   |
| 2 | 8.414               | 28809.9305 | 99.50  |
|   | Total               | 28955.1483 | 100.00 |

(3S,5S)-**2c**  
(er 99:1)

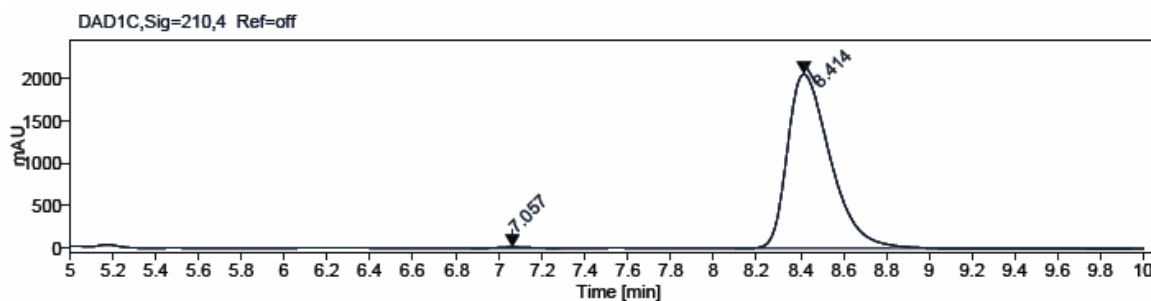

HPLC of (±)-**2d** from Agilent system fitted with a CHIRAL ART Cellulose-SC column:

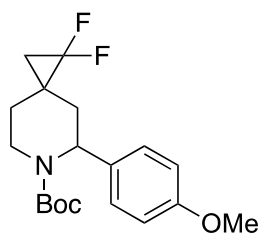

(±)-**2d**

|   | R <sub>t</sub> /min | Area      | Area/% |
|---|---------------------|-----------|--------|
| 1 | 11.283              | 2588.2621 | 49.97  |
| 2 | 13.206              | 2591.1975 | 50.03  |
|   | Total               | 5179.4596 | 100.00 |

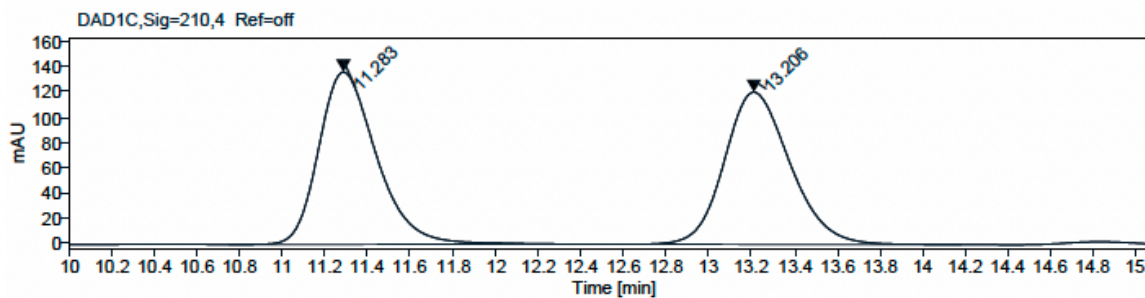

HPLC of (3*S*,5*S*)-**2d** (er 90:10) from Agilent system fitted with a CHIRAL ART Cellulose-SC column:

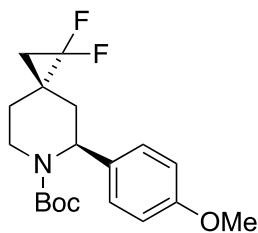

(3*S*,5*S*)-**2d**  
(er 90:10)

|   | R <sub>t</sub> /min | Area      | Area/% |
|---|---------------------|-----------|--------|
| 1 | 11.384              | 718.6112  | 9.77   |
| 2 | 13.213              | 6634.7685 | 90.23  |
|   | Total               | 7353.3796 | 100.00 |

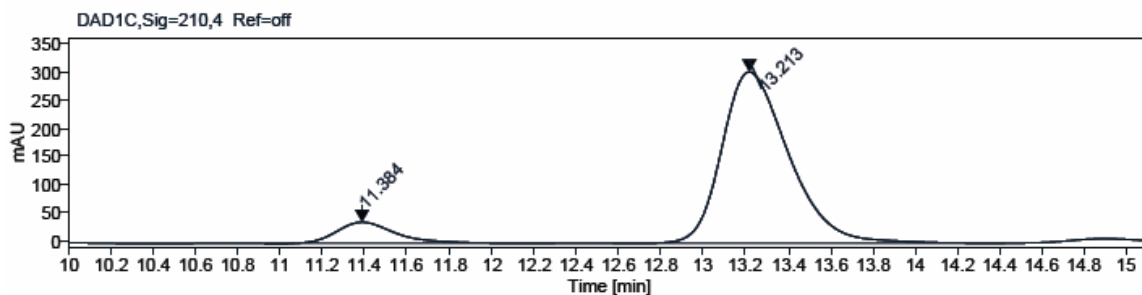

HPLC of (±)-**2e** from Agilent system fitted with a CHIRAL ART Cellulose-SC column:

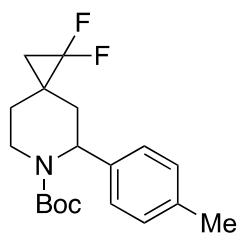

|   | R <sub>i</sub> /min | Area      | Area/% |
|---|---------------------|-----------|--------|
| 1 | 7.644               | 2449.8495 | 50.01  |
| 2 | 9.120               | 2448.5302 | 49.99  |
|   | Total               | 4898.3797 | 100.00 |

(±)-**2e**

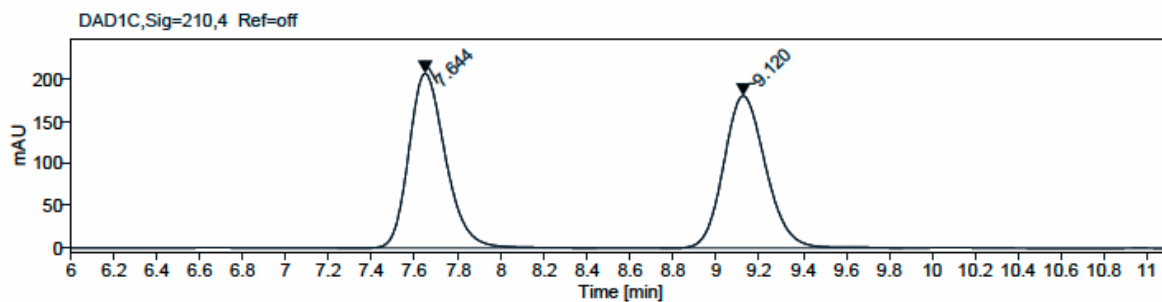

HPLC of (3*S*,5*S*)-**2e** (er 92:8) from Agilent system fitted with a CHIRAL ART Cellulose-SC column:

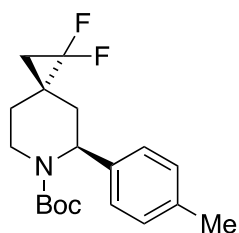

|   | R <sub>i</sub> /min | Area       | Area/% |
|---|---------------------|------------|--------|
| 1 | 7.542               | 927.9051   | 7.99   |
| 2 | 8.892               | 10686.6779 | 92.01  |
|   | Total               | 11614.5830 | 100.00 |

(3*S*,5*S*)-**2e**  
(er 92:8)

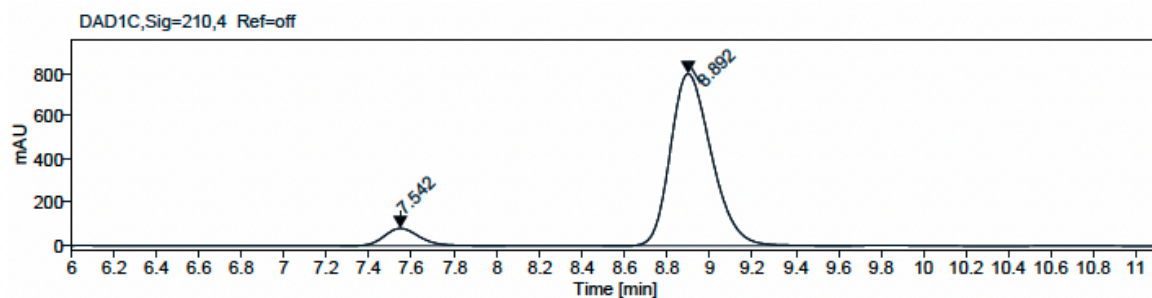

HPLC of (±)-**2f** from Agilent system fitted with a CHIRAL ART Cellulose-SC column:

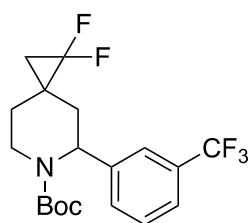

(±)-**2f**

|   | R <sub>t</sub> /min | Area       | Area/% |
|---|---------------------|------------|--------|
| 1 | 5.633               | 8551.2074  | 49.90  |
| 2 | 6.161               | 8586.0122  | 50.10  |
|   | Total               | 17137.2196 | 100.00 |

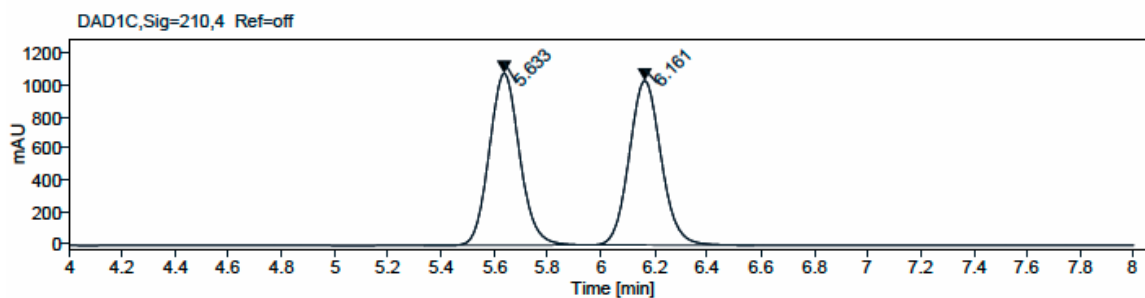

HPLC of (3*S*,5*S*)-**2f** (er 88:12) from Agilent system fitted with a CHIRAL ART Cellulose-SC column:

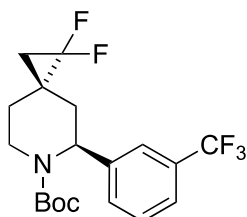

(3*S*,5*S*)-**2f**  
(er 88:12)

|   | R <sub>t</sub> /min | Area       | Area/% |
|---|---------------------|------------|--------|
| 1 | 5.386               | 2222.0088  | 11.87  |
| 2 | 5.933               | 16502.1968 | 88.13  |
|   | Total               | 18724.2056 | 100.00 |

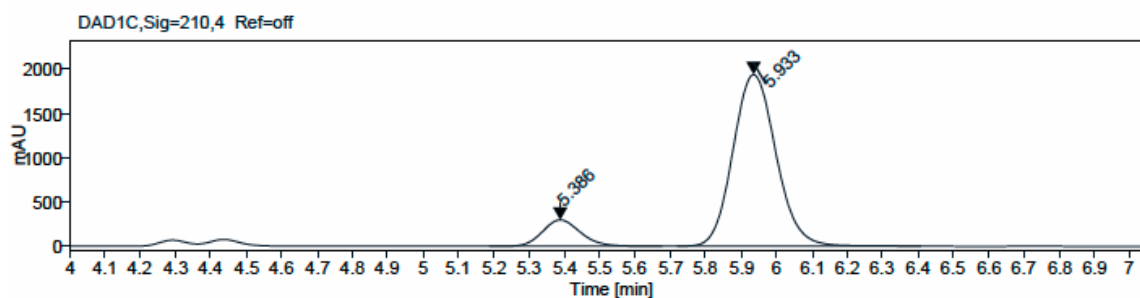

HPLC of ( $\pm$ )-5 from Beckman system fitted with a Lux Cellulose-2 column:

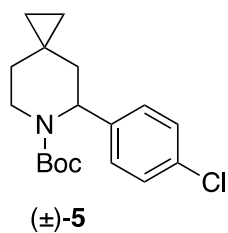

|   | R <sub>t</sub> /min | Area     | Area/% |
|---|---------------------|----------|--------|
| 1 | 17.6                | 1157.419 | 47.9   |
| 2 | 19.8                | 1256.427 | 52.1   |
|   | Total               | 2413.846 | 100.00 |

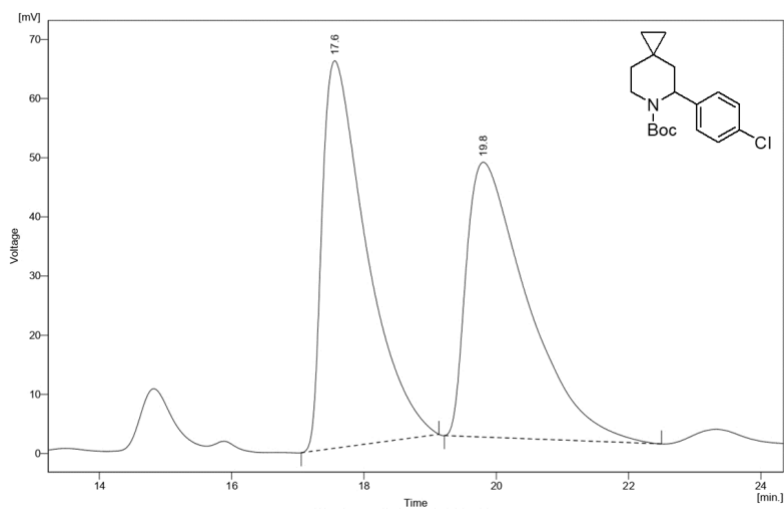

HPLC of (S)-5 from Beckman system fitted with a Lux Cellulose-2 column:

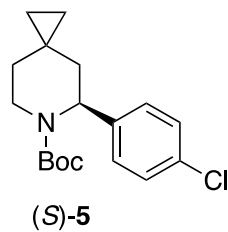

|   | R <sub>t</sub> /min | Area     | Area/% |
|---|---------------------|----------|--------|
| 1 | 17.7                | 85.855   | 7.8    |
| 2 | 19.9                | 1016.057 | 92.2   |
|   | Total               | 1101.912 | 100.00 |

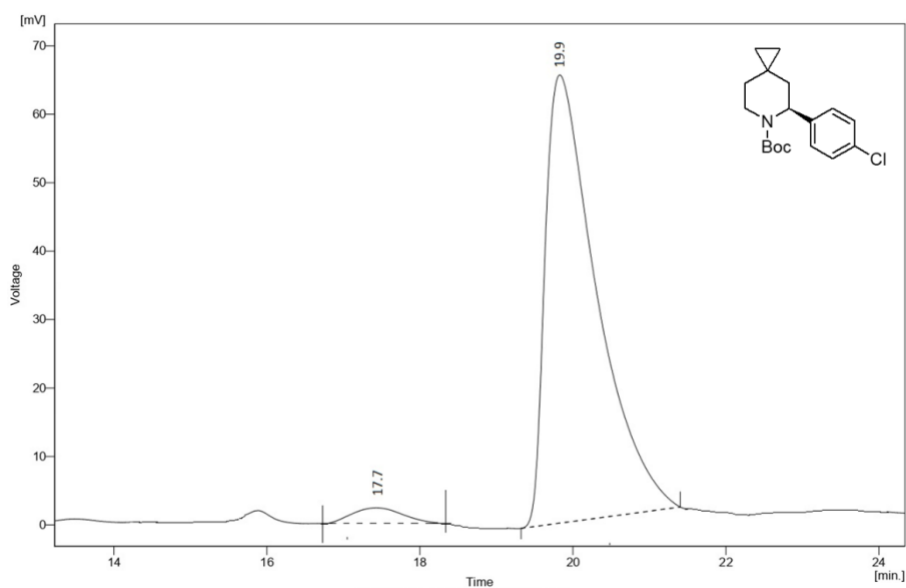

HPLC of ( $\pm$ )-**8** from Beckman system fitted with a Lux Amylose-2 column:

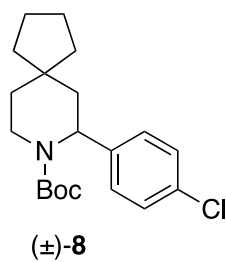

|   | R <sub>t</sub> /min | Area     | Area/% |
|---|---------------------|----------|--------|
| 1 | 7.08                | 38848.46 | 49.6   |
| 2 | 7.93                | 39549.28 | 50.4   |
|   | Total               | 78397.74 | 100.00 |

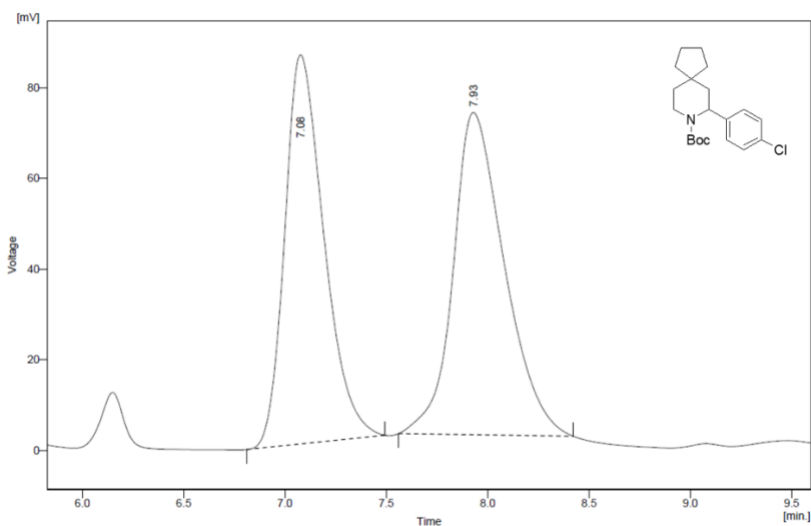

HPLC of (*S*)-**8** from Beckman system fitted with a Lux Amylose-2 column:

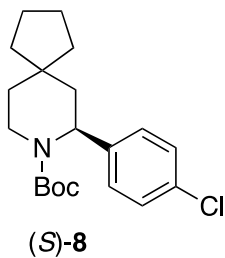

|   | R <sub>t</sub> /min | Area     | Area/% |
|---|---------------------|----------|--------|
| 1 | 7.0                 | 257.636  | 3.1    |
| 2 | 7.7                 | 5681.100 | 96.9   |
|   | Total               | 5938.736 | 100.00 |

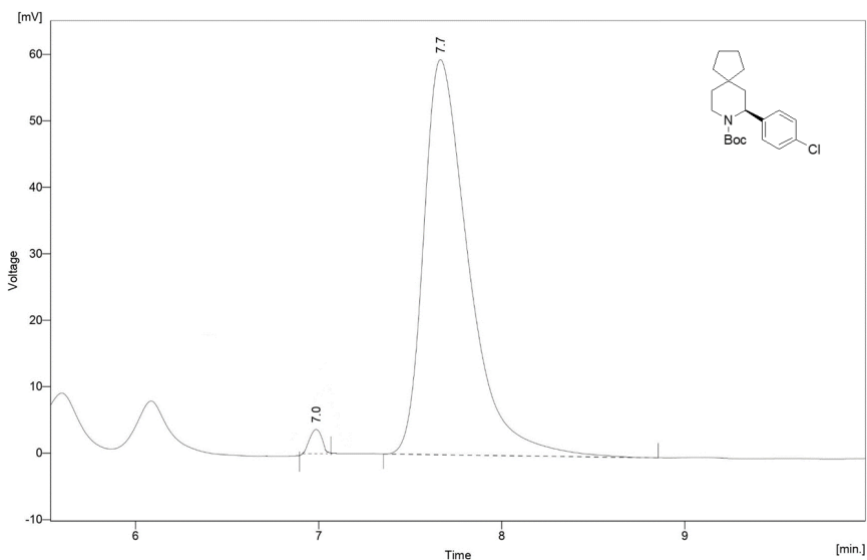

HPLC of (±)-**9a** from Agilent system fitted with a CHIRAL ART Cellulose-SC column:

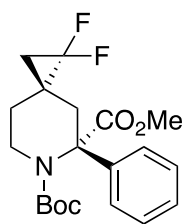

(±)-**9a**

|   | R <sub>i</sub> /min | Area       | Area/% |
|---|---------------------|------------|--------|
| 1 | 11.543              | 12297.7516 | 48.48  |
| 2 | 16.022              | 13070.9555 | 51.52  |
|   | Total               | 25368.7071 | 100.00 |

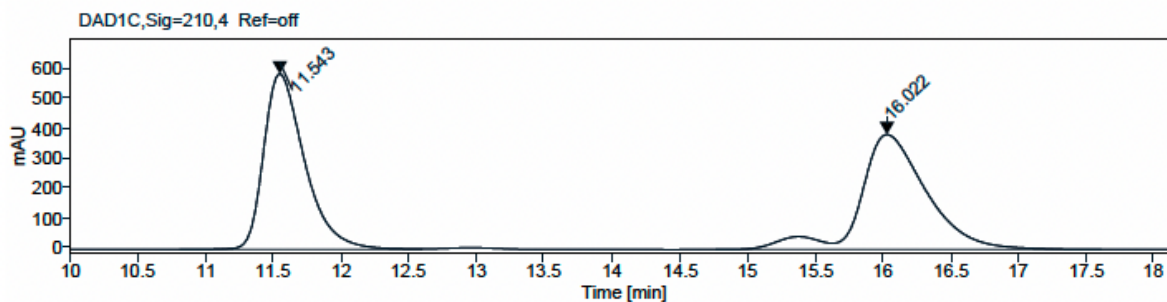

HPLC of (3*R*,5*R*)-**9a** (er 86:14) from Agilent system fitted with a CHIRAL ART Cellulose-SC column:

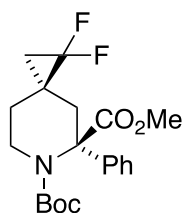

(3*R*,5*R*)-**9a**  
(er 86:14)

|   | R <sub>i</sub> /min | Area       | Area/% |
|---|---------------------|------------|--------|
| 1 | 11.466              | 18787.2635 | 86.27  |
| 2 | 15.811              | 2989.2703  | 13.73  |
|   | Total               | 21776.5338 | 100.00 |

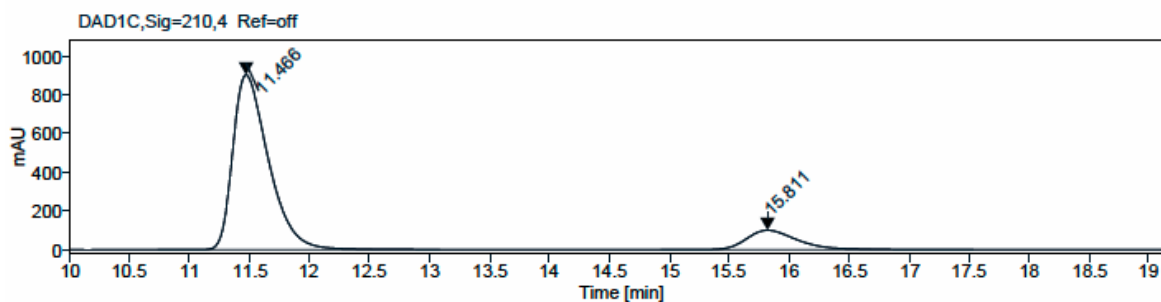

HPLC of ( $\pm$ )-**9b** from Agilent system fitted with a CHIRAL ART Cellulose-SC column:

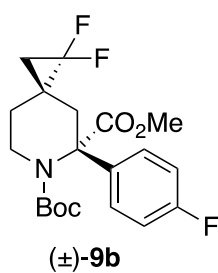

|   | R <sub>t</sub> /min | Area      | Area/% |
|---|---------------------|-----------|--------|
| 1 | 8.931               | 4844.7521 | 49.91  |
| 2 | 10.968              | 4862.6680 | 50.09  |
|   | Total               | 9707.4201 | 100.00 |

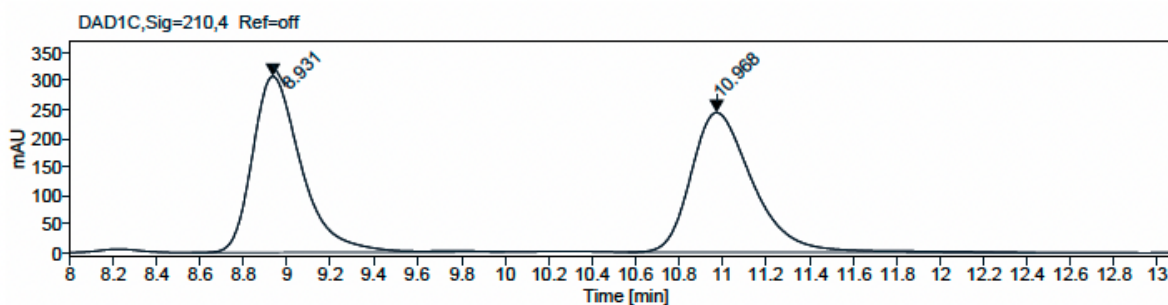

HPLC of (3*R*,5*R*)-**9b** (er 76:24) from Agilent system fitted with a CHIRAL ART Cellulose-SC column:

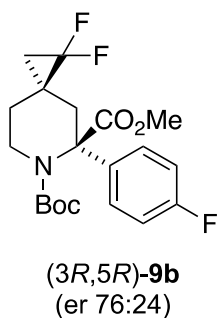

|   | R <sub>t</sub> /min | Area      | Area/% |
|---|---------------------|-----------|--------|
| 1 | 9.022               | 5434.9551 | 76.17  |
| 2 | 11.210              | 1700.3942 | 23.83  |
|   | Total               | 7135.3493 | 100.00 |

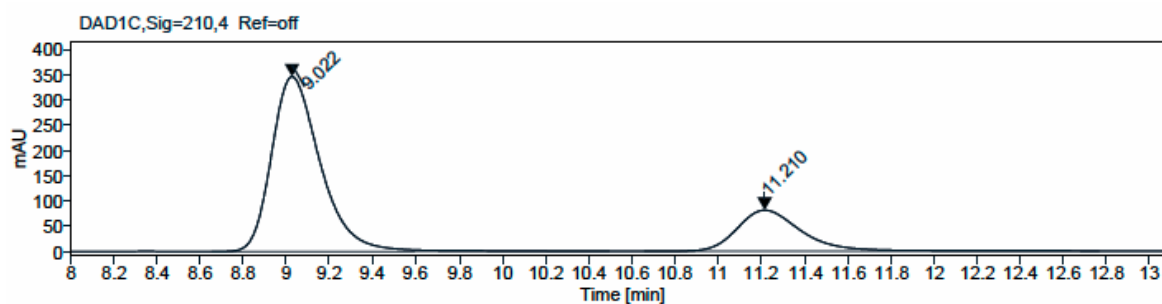



HPLC of ( $\pm$ )-**9c** from Agilent system fitted with a CHIRAL ART Cellulose-SC column:

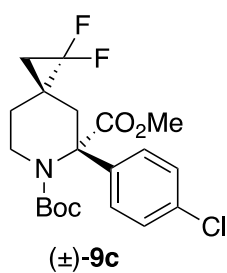

|   | R <sub>t</sub> /min | Area      | Area/% |
|---|---------------------|-----------|--------|
| 1 | 9.596               | 3141.4616 | 50.06  |
| 2 | 12.831              | 3133.7045 | 49.94  |
|   | Total               | 6275.1662 | 100.00 |

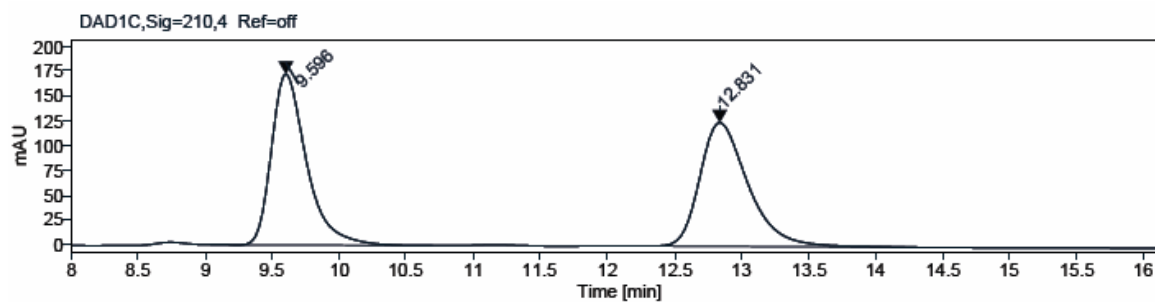

HPLC of (3*R*,5*R*)-**9c** (er 79:21) from Agilent system fitted with a CHIRAL ART Cellulose-SC column:

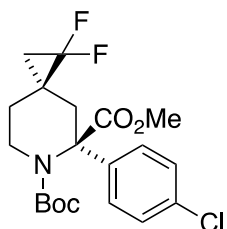

|   | R <sub>t</sub> /min | Area      | Area/% |
|---|---------------------|-----------|--------|
| 1 | 9.721               | 2914.8609 | 78.70  |
| 2 | 12.811              | 789.0472  | 21.30  |
|   | Total               | 3703.9081 | 100.00 |

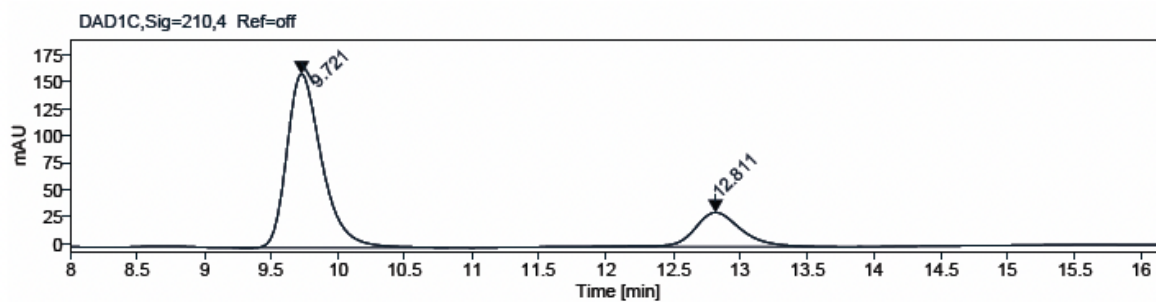

HPLC of (3S,5S)-**9c** (er 99:1) from Agilent system fitted with a CHIRAL ART Cellulose-SC column:

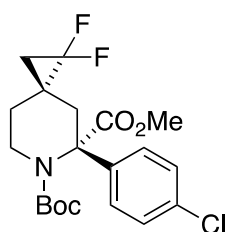

|   | R <sub>t</sub> /min | Area      | Area/% |
|---|---------------------|-----------|--------|
| 1 | 9.523               | 35.3430   | 1.30   |
| 2 | 12.495              | 2678.7830 | 98.70  |
|   | Total               | 2714.1261 | 100.00 |

(3S,5S)-**9c**  
(er 99:1)

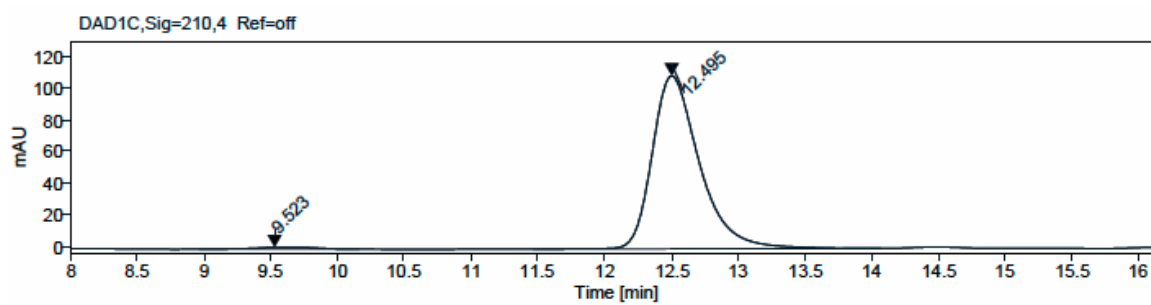

HPLC of (±)-**9d** from Agilent system fitted with a CHIRAL ART Cellulose-SC column:

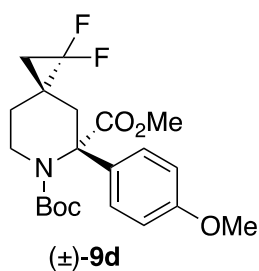

|   | R <sub>t</sub> /min | Area       | Area/% |
|---|---------------------|------------|--------|
| 1 | 10.532              | 5647.1188  | 49.95  |
| 2 | 16.828              | 5658.4015  | 50.04  |
|   | Total               | 11305.5203 | 100.00 |

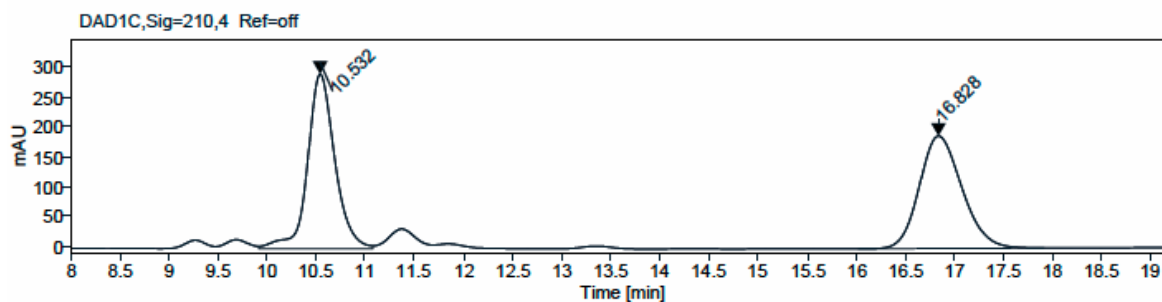

HPLC of (3*R*,5*R*)-**9d** (er 62:38) from Agilent system fitted with a CHIRAL ART Cellulose-SC column:

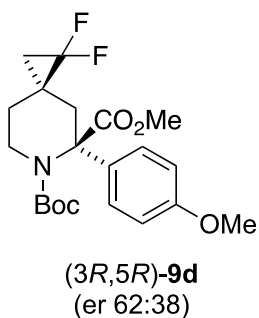

|   | R <sub>t</sub> /min | Area       | Area/% |
|---|---------------------|------------|--------|
| 1 | 10.331              | 7019.9956  | 62.23  |
| 2 | 16.715              | 4260.6957  | 37.77  |
|   | Total               | 11280.6913 | 100.00 |

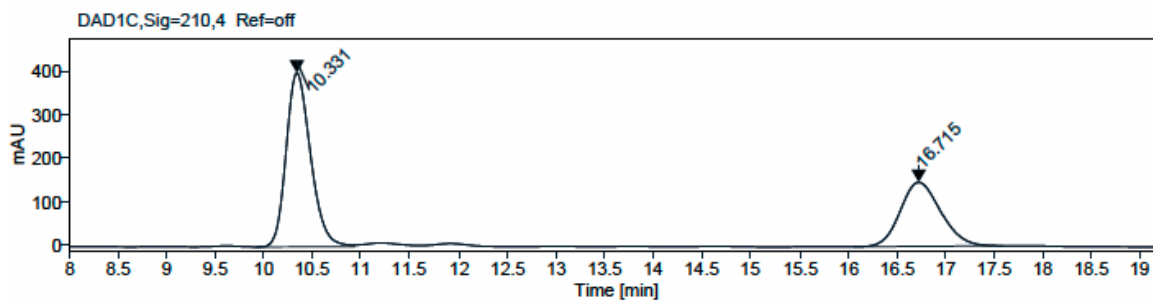

HPLC of ( $\pm$ )-**9e** from Agilent system fitted with a CHIRAL ART Cellulose-SC column:

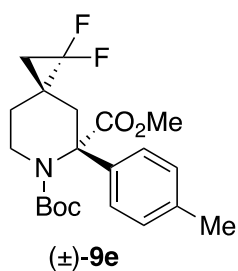

|   | R <sub>t</sub> /min | Area       | Area/% |
|---|---------------------|------------|--------|
| 1 | 10.861              | 11169.1168 | 50.36  |
| 2 | 16.672              | 11010.0858 | 49.64  |
|   | Total               | 22179.2026 | 100.00 |

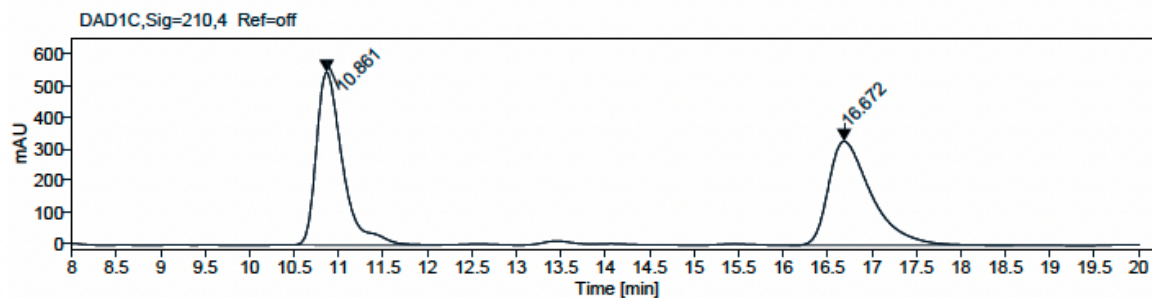

HPLC of (3*R*,5*R*)-**9e** (er 84:16) from Agilent system fitted with a CHIRAL ART Cellulose-SC column:

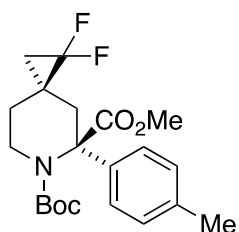

|   | R <sub>t</sub> /min | Area       | Area/% |
|---|---------------------|------------|--------|
| 1 | 10.542              | 10137.8176 | 84.10  |
| 2 | 16.282              | 1916.1275  | 15.90  |
|   | Total               | 12053.9451 | 100.00 |

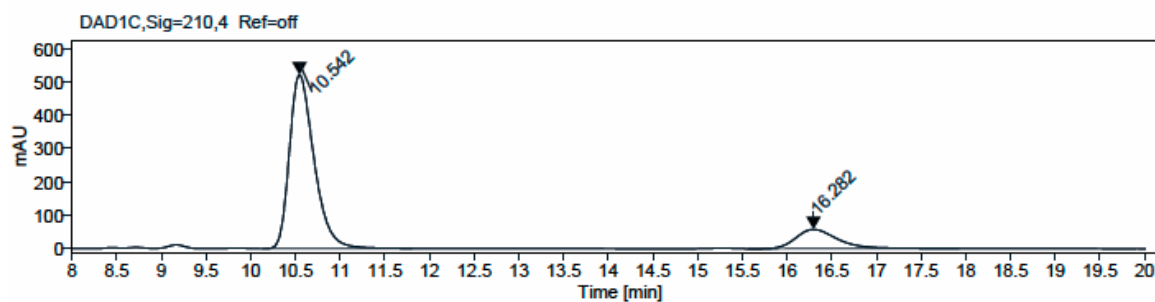

HPLC of (±)-**9f** from Agilent system fitted with a CHIRAL ART Cellulose-SC column:

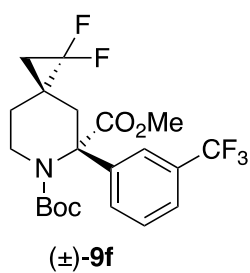

|   | R <sub>t</sub> /min | Area       | Area/% |
|---|---------------------|------------|--------|
| 1 | 6.075               | 8230.1892  | 49.81  |
| 2 | 7.113               | 8293.6463  | 50.19  |
|   | Total               | 16523.8356 | 100.00 |

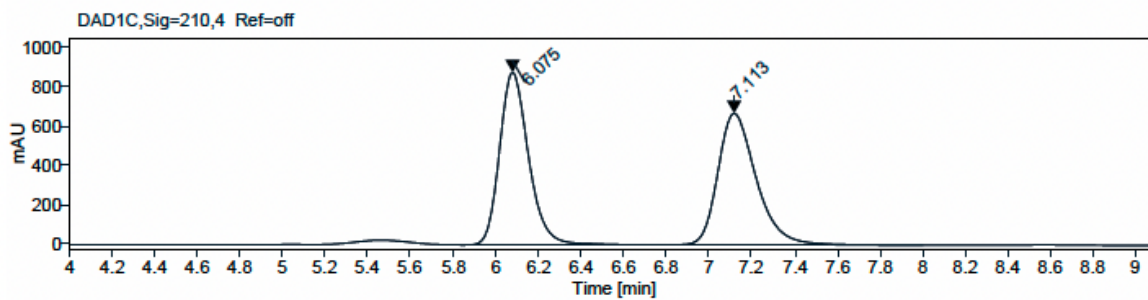

HPLC of (3*R*,5*R*)-**9f** (er 72:28) from Agilent system fitted with a CHIRAL ART Cellulose-SC column:

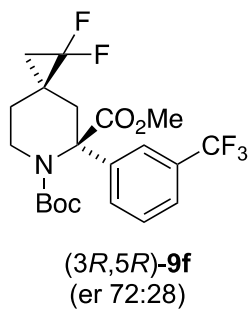

|   | R <sub>t</sub> /min | Area       | Area/% |
|---|---------------------|------------|--------|
| 1 | 6.609               | 8235.8640  | 71.86  |
| 2 | 8.074               | 3224.6532  | 28.14  |
|   | Total               | 11460.5172 | 100.00 |

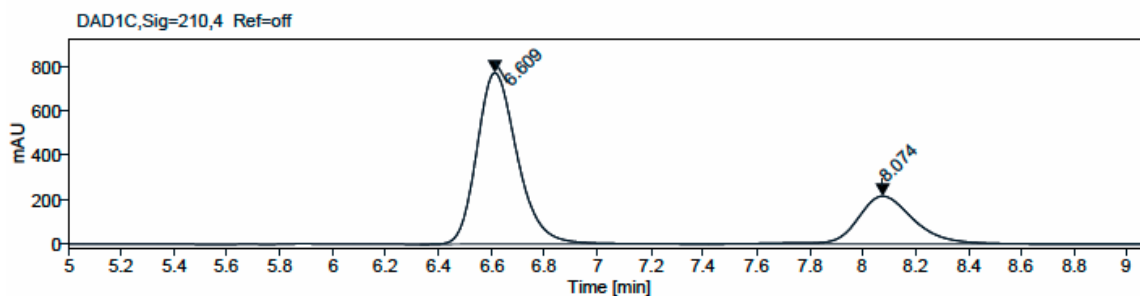

HPLC of (±)-**10** from Agilent system fitted with a CHIRAL ART Cellulose-SC column:

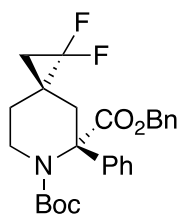

|   | R <sub>t</sub> /min | Area       | Area/% |
|---|---------------------|------------|--------|
| 1 | 21.787              | 25118.4965 | 50.79  |
| 2 | 27.096              | 24341.5611 | 49.21  |
|   | Total               | 49460.0576 | 100.00 |

(±)-**10**

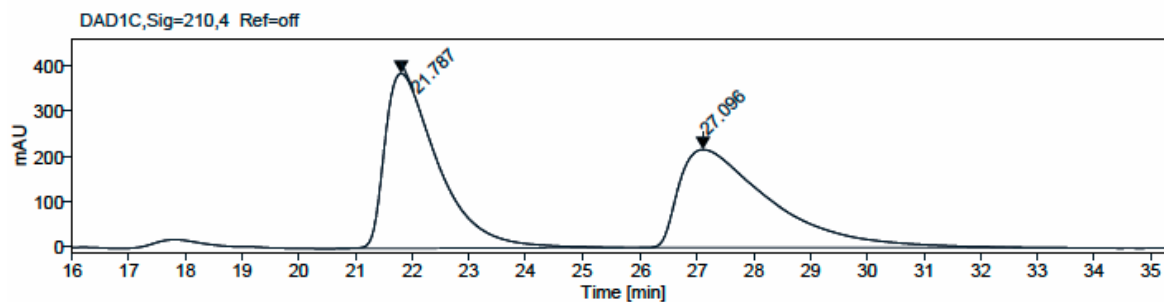

HPLC of (3S,5S)-**10** (er 99:1) from Agilent system fitted with a CHIRAL ART Cellulose-SC column:

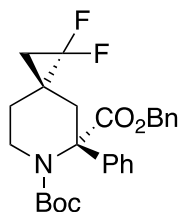

|   | R <sub>t</sub> /min | Area       | Area/% |
|---|---------------------|------------|--------|
| 1 | 21.235              | 16821.4506 | 98.99  |
| 2 | 28.751              | 171.0768   | 1.01   |
|   | Total               | 16992.5274 | 100.00 |

(3S,5S)-**10**

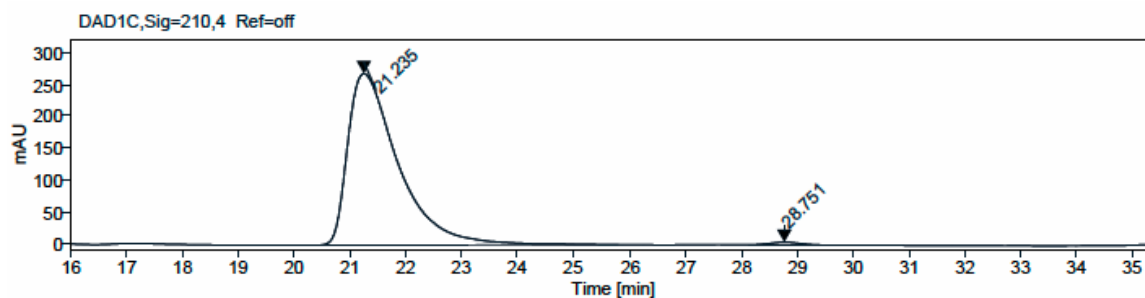

HPLC of (±)-**13** from Beckman system fitted with a Lux Amylose–2 column:

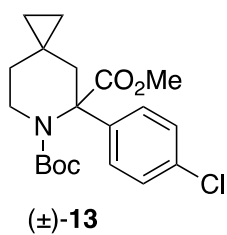

|   | R <sub>t</sub> /min | Area    | Area/% |
|---|---------------------|---------|--------|
| 1 | 16.4                | 3893.83 | 50.5   |
| 2 | 18.5                | 3813.25 | 49.5   |
|   | Total               | 7707.08 | 100.00 |

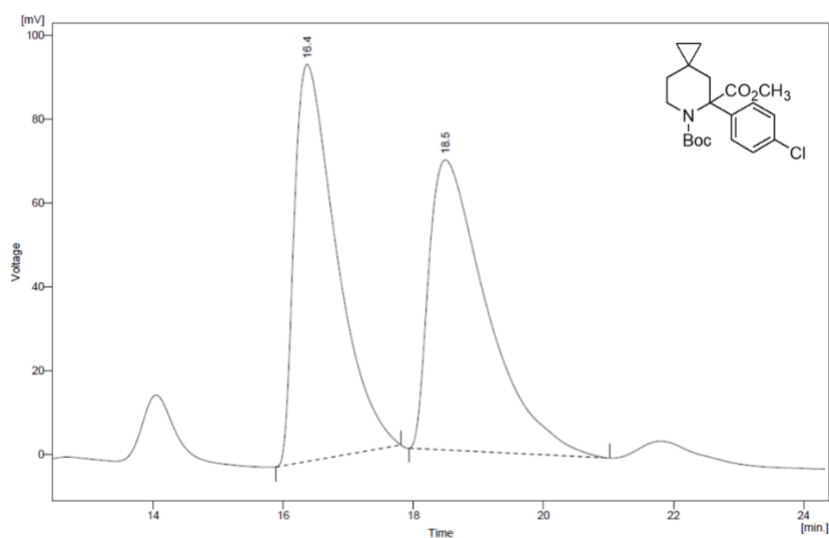

HPLC of (*R*)-**13** from Beckman system fitted with a Lux Amylose–2 column:

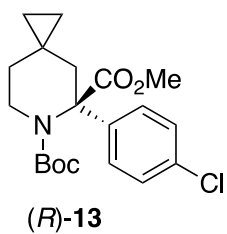

|   | R <sub>t</sub> /min | Area     | Area/% |
|---|---------------------|----------|--------|
| 1 | 16.3                | 22727.95 | 90.2   |
| 2 | 18.4                | 2807.15  | 9.8    |
|   | Total               | 25535.10 | 100.00 |

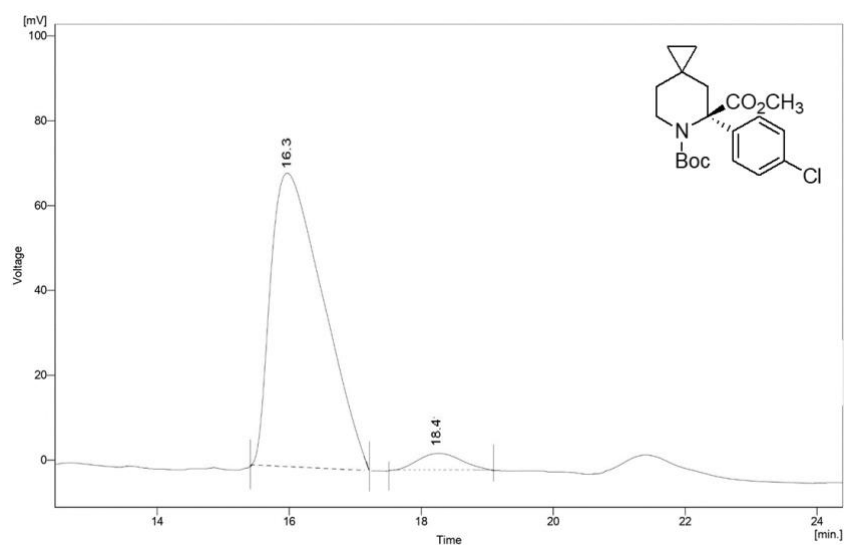

HPLC of ( $\pm$ )-14 from Beckman system fitted with a Lux Amylose-2 column:

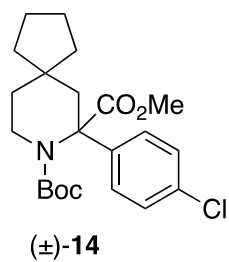

|   | R <sub>t</sub> /min | Area     | Area/% |
|---|---------------------|----------|--------|
| 1 | 7.8                 | 7036.12  | 48.6   |
| 2 | 14.2                | 6405.50  | 51.4   |
|   | Total               | 13441.62 | 100.00 |

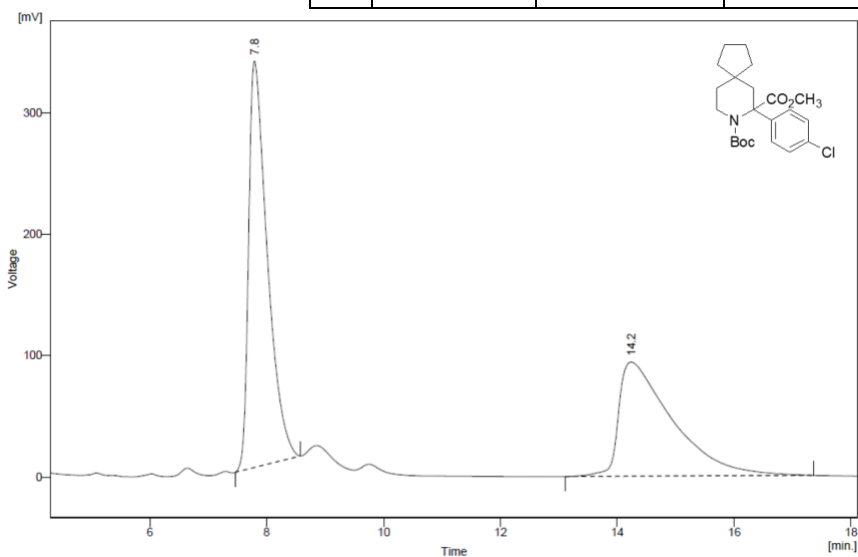

HPLC of (*R*)-14 from Beckman system fitted with a Lux Amylose-2 column:

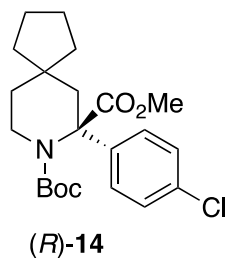

|   | R <sub>t</sub> /min | Area     | Area/% |
|---|---------------------|----------|--------|
| 1 | 8.0                 | 28550.72 | 96.1   |
| 2 | 14.8                | 806.48   | 3.9    |
|   | Total               | 29357.20 | 100.00 |

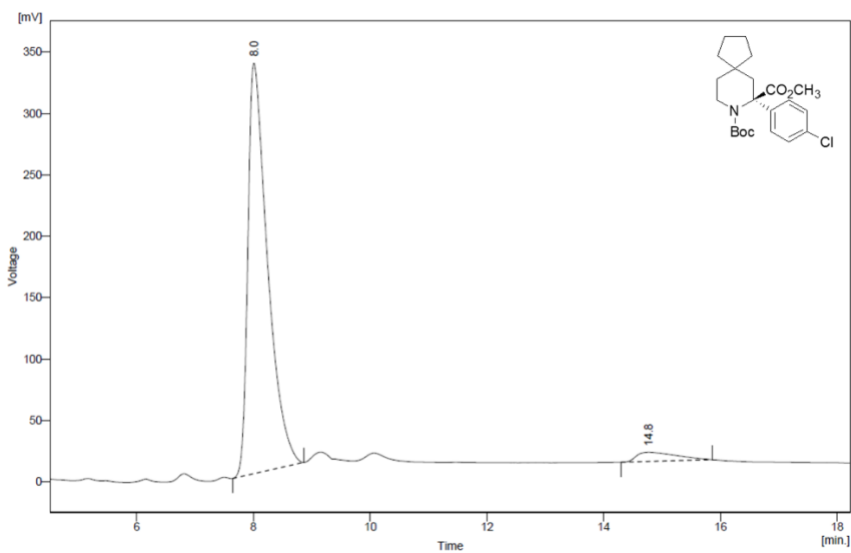



## 9. X-Ray crystallography data for spiropiperidine ( $\pm$ )-2d

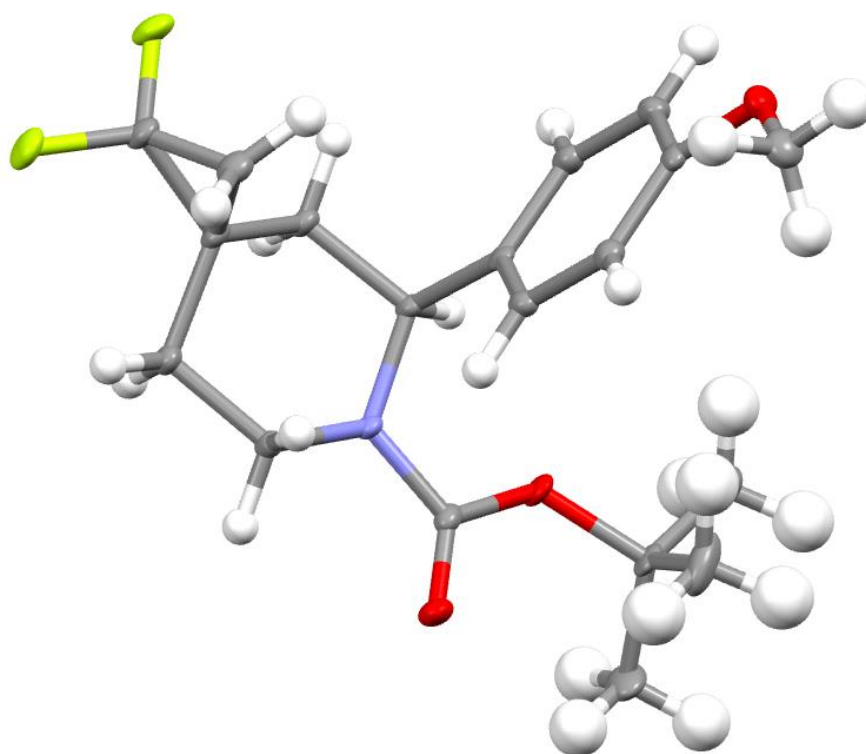

**Figure S-1** X-ray for ( $\pm$ )-2d

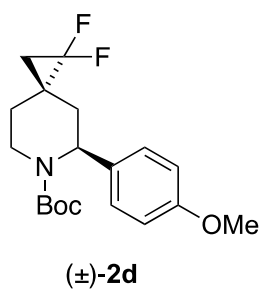

CCDC 2312678

**Table S-1 Crystal data and structure refinement for OIC327s\_0m (2d).**

|                                             |                                                                |
|---------------------------------------------|----------------------------------------------------------------|
| Identification code                         | OIC327s_0m                                                     |
| Empirical formula                           | C <sub>19</sub> H <sub>25</sub> F <sub>2</sub> NO <sub>3</sub> |
| Formula weight                              | 353.40                                                         |
| Temperature/K                               | 100                                                            |
| Crystal system                              | triclinic                                                      |
| Space group                                 | P-1                                                            |
| a/Å                                         | 6.496(3)                                                       |
| b/Å                                         | 11.821(5)                                                      |
| c/Å                                         | 12.772(5)                                                      |
| α/°                                         | 73.748(8)                                                      |
| β/°                                         | 83.671(9)                                                      |
| γ/°                                         | 75.267(8)                                                      |
| Volume/Å <sup>3</sup>                       | 909.8(6)                                                       |
| Z                                           | 2                                                              |
| ρ <sub>calc</sub> /cm <sup>3</sup>          | 1.290                                                          |
| μ/mm <sup>-1</sup>                          | 0.100                                                          |
| F(000)                                      | 376.0                                                          |
| Crystal size/mm <sup>3</sup>                | 0.5 × 0.5 × 0.45                                               |
| Radiation                                   | MoKα (λ = 0.71073)                                             |
| 2θ range for data collection/°              | 3.324 to 57.834                                                |
| Index ranges                                | -8 ≤ h ≤ 8, -16 ≤ k ≤ 15, -17 ≤ l ≤ 17                         |
| Reflections collected                       | 36476                                                          |
| Independent reflections                     | 4707 [R <sub>int</sub> = 0.0802, R <sub>sigma</sub> = 0.0456]  |
| Data/restraints/parameters                  | 4707/0/230                                                     |
| Goodness-of-fit on F <sup>2</sup>           | 1.041                                                          |
| Final R indexes [I ≥ 2σ (I)]                | R <sub>1</sub> = 0.0410, wR <sub>2</sub> = 0.1094              |
| Final R indexes [all data]                  | R <sub>1</sub> = 0.0488, wR <sub>2</sub> = 0.1173              |
| Largest diff. peak/hole / e Å <sup>-3</sup> | 0.34/-0.32                                                     |

**Table S-2 Fractional Atomic Coordinates ( $\times 10^4$ ) and Equivalent Isotropic Displacement Parameters ( $\text{\AA}^2 \times 10^3$ ) for OIC327s\_0m.  $U_{\text{eq}}$  is defined as 1/3 of the trace of the orthogonalised  $U_{ij}$  tensor.**

| Atom | <i>x</i>    | <i>y</i>    | <i>z</i>    | $U_{\text{eq}}$ |
|------|-------------|-------------|-------------|-----------------|
| F1   | 7167.1 (11) | 556.8 (6)   | 7610.8 (6)  | 23.83 (17)      |
| F2   | 9956.1 (10) | 902.5 (6)   | 6532.9 (6)  | 24.52 (17)      |
| O1   | 8528.5 (12) | 838.5 (7)   | 854.8 (7)   | 19.88 (18)      |
| O2   | 553.3 (12)  | 4773.6 (7)  | 3555.6 (7)  | 18.72 (18)      |
| O3   | 3557.2 (12) | 5337.1 (7)  | 2701.3 (6)  | 17.67 (18)      |
| N1   | 3824.9 (13) | 3917.4 (8)  | 4293.8 (7)  | 13.07 (18)      |
| C1   | 6127.7 (15) | 3590.3 (9)  | 3999.4 (8)  | 12.7 (2)        |
| C2   | 7426.8 (16) | 2975.4 (9)  | 5025.4 (8)  | 14.1 (2)        |
| C3   | 6456.0 (16) | 2023.9 (9)  | 5823.9 (8)  | 14.2 (2)        |
| C4   | 4218.3 (16) | 2573.3 (10) | 6186.1 (9)  | 15.9 (2)        |
| C5   | 2841.2 (16) | 3106.3 (10) | 5193.5 (8)  | 14.8 (2)        |
| C6   | 6643.6 (15) | 2832.7 (9)  | 3173.0 (8)  | 13.2 (2)        |
| C7   | 8645.4 (16) | 2740.5 (10) | 2619.4 (9)  | 16.5 (2)        |
| C8   | 9225.9 (17) | 2075.4 (10) | 1855.3 (9)  | 18.1 (2)        |
| C9   | 7811.5 (16) | 1470.3 (9)  | 1625.8 (8)  | 15.4 (2)        |
| C10  | 5812.7 (17) | 1554.3 (9)  | 2157.1 (9)  | 15.6 (2)        |
| C11  | 5246.7 (16) | 2240.3 (9)  | 2923.5 (9)  | 14.8 (2)        |
| C12  | 7123.2 (19) | 213.1 (11)  | 595.4 (10)  | 23.0 (2)        |
| C13  | 6932.0 (18) | 713.6 (10)  | 5668.5 (9)  | 19.2 (2)        |
| C14  | 7829.5 (17) | 979.2 (10)  | 6556.2 (9)  | 18.1 (2)        |
| C15  | 2470.9 (16) | 4684.0 (9)  | 3508.4 (8)  | 13.8 (2)        |
| C16  | 2610.8 (18) | 6023.5 (10) | 1644.7 (9)  | 18.3 (2)        |
| C17  | 4486 (2)    | 6483.0 (14) | 1004.7 (11) | 34.6 (3)        |
| C18  | 1927 (3)    | 5179.5 (13) | 1124.8 (11) | 36.7 (3)        |
| C19  | 789 (2)     | 7074.5 (12) | 1780.6 (11) | 30.9 (3)        |

**Table S-3 Anisotropic Displacement Parameters ( $\text{\AA}^2 \times 10^3$ ) for OIC327s\_0m. The Anisotropic displacement factor exponent takes the form: -  $2\pi^2[h^2a^{*2}U_{11}+2hka^*b^*U_{12}+\dots]$ .**

| Atom | U <sub>11</sub> | U <sub>22</sub> | U <sub>33</sub> | U <sub>23</sub> | U <sub>13</sub> | U <sub>12</sub> |
|------|-----------------|-----------------|-----------------|-----------------|-----------------|-----------------|
| F1   | 26.8 (4)        | 23.1 (4)        | 14.6 (3)        | 6.6 (3)         | -6.8 (3)        | -3.7 (3)        |
| F2   | 16.2 (3)        | 26.0 (4)        | 23.5 (4)        | 2.9 (3)         | -8.7 (3)        | 2.0 (3)         |
| O1   | 19.3 (4)        | 22.6 (4)        | 15.8 (4)        | -7.3 (3)        | 0.6 (3)         | 0.5 (3)         |
| O2   | 13.4 (3)        | 21.2 (4)        | 16.6 (4)        | -1.3 (3)        | -4.3 (3)        | 2.3 (3)         |
| O3   | 16.9 (4)        | 17.7 (4)        | 11.5 (4)        | 5.1 (3)         | -5.0 (3)        | 0.2 (3)         |
| N1   | 11.3 (4)        | 12.7 (4)        | 10.4 (4)        | 1.0 (3)         | -2.0 (3)        | 1.9 (3)         |
| C1   | 10.5 (4)        | 12.3 (5)        | 11.4 (5)        | 0.6 (4)         | -1.8 (3)        | 0.8 (3)         |
| C2   | 12.7 (4)        | 14.4 (5)        | 12.4 (5)        | -0.3 (4)        | -3.9 (4)        | -0.5 (4)        |
| C3   | 14.1 (4)        | 13.3 (5)        | 11.6 (5)        | 0.5 (4)         | -4.5 (4)        | 0.7 (4)         |
| C4   | 14.9 (5)        | 17.3 (5)        | 11.0 (5)        | 0.6 (4)         | -1.8 (4)        | 0.0 (4)         |
| C5   | 12.3 (4)        | 16.0 (5)        | 11.8 (5)        | 0.7 (4)         | -1.3 (4)        | 0.0 (4)         |
| C6   | 13.2 (4)        | 11.4 (4)        | 9.7 (5)         | 1.9 (4)         | -2.9 (4)        | 2.4 (3)         |
| C7   | 13.1 (5)        | 18.8 (5)        | 14.5 (5)        | -0.6 (4)        | -2.3 (4)        | -1.5 (4)        |
| C8   | 12.9 (5)        | 21.2 (5)        | 15.3 (5)        | -1.8 (4)        | 0.2 (4)         | 1.1 (4)         |
| C9   | 16.8 (5)        | 13.7 (5)        | 10.0 (5)        | 0.3 (4)         | -2.5 (4)        | 3.3 (4)         |
| C10  | 16.0 (5)        | 14.4 (5)        | 13.5 (5)        | -0.9 (4)        | -2.4 (4)        | -0.6 (4)        |
| C11  | 12.2 (4)        | 15.1 (5)        | 13.3 (5)        | -0.8 (4)        | -0.6 (4)        | 0.4 (4)         |
| C12  | 25.5 (6)        | 21.0 (6)        | 22.1 (6)        | -9.0 (5)        | 0.7 (5)         | -1.6 (4)        |
| C13  | 20.6 (5)        | 14.3 (5)        | 18.8 (5)        | -0.6 (4)        | -5.3 (4)        | 0.4 (4)         |
| C14  | 16.1 (5)        | 17.5 (5)        | 14.8 (5)        | 3.1 (4)         | -4.7 (4)        | -0.1 (4)        |
| C15  | 16.2 (5)        | 11.3 (4)        | 11.0 (5)        | -2.0 (4)        | -2.7 (4)        | 1.7 (4)         |
| C16  | 21.1 (5)        | 16.0 (5)        | 10.6 (5)        | 3.0 (4)         | -5.9 (4)        | 3.6 (4)         |
| C17  | 27.9 (6)        | 40.7 (8)        | 19.3 (6)        | 13.2 (5)        | -2.1 (5)        | -2.5 (6)        |
| C18  | 65.7 (10)       | 26.8 (7)        | 16.6 (6)        | -1.2 (5)        | -14.3 (6)       | -8.8 (6)        |
| C19  | 33.2 (7)        | 21.2 (6)        | 23.4 (6)        | 2.9 (5)         | -3.1 (5)        | 11.4 (5)        |

**Table S-4 Bond Lengths for OIC327s\_0m.**

| Atom | Atom | Length/Å    | Atom | Atom | Length/Å    |
|------|------|-------------|------|------|-------------|
| F1   | C14  | 1.3615 (14) | C3   | C13  | 1.5650 (16) |
| F2   | C14  | 1.3587 (14) | C3   | C14  | 1.4741 (15) |
| O1   | C9   | 1.3704 (13) | C4   | C5   | 1.5233 (15) |
| O1   | C12  | 1.4272 (15) | C6   | C7   | 1.4040 (15) |
| O2   | C15  | 1.2192 (14) | C6   | C11  | 1.3883 (15) |
| O3   | C15  | 1.3519 (13) | C7   | C8   | 1.3821 (16) |
| O3   | C16  | 1.4744 (13) | C8   | C9   | 1.3974 (16) |
| N1   | C1   | 1.4805 (13) | C9   | C10  | 1.3907 (15) |
| N1   | C5   | 1.4768 (13) | C10  | C11  | 1.4015 (15) |
| N1   | C15  | 1.3717 (14) | C13  | C14  | 1.4705 (17) |
| C1   | C2   | 1.5350 (15) | C16  | C17  | 1.5217 (18) |
| C1   | C6   | 1.5254 (15) | C16  | C18  | 1.5148 (19) |
| C2   | C3   | 1.5099 (15) | C16  | C19  | 1.5171 (16) |
| C3   | C4   | 1.5128 (15) |      |      |             |

**Table S-5 Bond Angles for OIC327s\_0m.**

| Atom | Atom | Atom | Angle/°     | Atom | Atom | Atom | Angle/°     |
|------|------|------|-------------|------|------|------|-------------|
| C9   | O1   | C12  | 117.20 (9)  | O1   | C9   | C8   | 115.61 (9)  |
| C15  | O3   | C16  | 121.71 (9)  | O1   | C9   | C10  | 124.59 (10) |
| C5   | N1   | C1   | 121.02 (8)  | C10  | C9   | C8   | 119.79 (10) |
| C15  | N1   | C1   | 118.65 (9)  | C9   | C10  | C11  | 119.46 (10) |
| C15  | N1   | C5   | 115.51 (9)  | C6   | C11  | C10  | 121.51 (9)  |
| N1   | C1   | C2   | 110.80 (8)  | C14  | C13  | C3   | 58.01 (7)   |
| N1   | C1   | C6   | 113.24 (8)  | F1   | C14  | C3   | 120.09 (9)  |
| C6   | C1   | C2   | 111.72 (8)  | F1   | C14  | C13  | 120.08 (10) |
| C3   | C2   | C1   | 112.34 (9)  | F2   | C14  | F1   | 108.22 (9)  |
| C2   | C3   | C4   | 110.87 (9)  | F2   | C14  | C3   | 119.57 (9)  |
| C2   | C3   | C13  | 119.78 (9)  | F2   | C14  | C13  | 119.35 (10) |
| C4   | C3   | C13  | 118.03 (9)  | C13  | C14  | C3   | 64.21 (8)   |
| C14  | C3   | C2   | 119.95 (9)  | O2   | C15  | O3   | 125.46 (10) |
| C14  | C3   | C4   | 121.25 (9)  | O2   | C15  | N1   | 124.11 (10) |
| C14  | C3   | C13  | 57.78 (7)   | O3   | C15  | N1   | 110.41 (9)  |
| C3   | C4   | C5   | 109.02 (9)  | O3   | C16  | C17  | 101.43 (9)  |
| N1   | C5   | C4   | 112.33 (9)  | O3   | C16  | C18  | 109.92 (10) |
| C7   | C6   | C1   | 118.02 (9)  | O3   | C16  | C19  | 110.88 (9)  |
| C11  | C6   | C1   | 124.09 (9)  | C18  | C16  | C17  | 111.17 (12) |
| C11  | C6   | C7   | 117.88 (10) | C18  | C16  | C19  | 112.26 (12) |
| C8   | C7   | C6   | 121.42 (10) | C19  | C16  | C17  | 110.67 (11) |
| C7   | C8   | C9   | 119.93 (10) |      |      |      |             |

**Table S-6 Torsion Angles for OIC327s\_0m.**

| A  | B   | C   | D   | Angle/°     | A   | B   | C   | D   | Angle/°     |
|----|-----|-----|-----|-------------|-----|-----|-----|-----|-------------|
| O1 | C9  | C10 | C11 | -179.25 (9) | C5  | N1  | C1  | C2  | -38.57 (12) |
| N1 | C1  | C2  | C3  | 45.39 (11)  | C5  | N1  | C1  | C6  | 87.88 (11)  |
| N1 | C1  | C6  | C7  | 163.44 (9)  | C5  | N1  | C15 | O2  | 4.66 (15)   |
| N1 | C1  | C6  | C11 | -15.71 (14) | C5  | N1  | C15 | O3  | -176.91 (8) |
| C1 | N1  | C5  | C4  | 42.41 (13)  | C6  | C1  | C2  | C3  | -81.89 (11) |
| C1 | N1  | C15 | O2  | 160.35 (10) | C6  | C7  | C8  | C9  | -0.43 (16)  |
| C1 | N1  | C15 | O3  | -21.22 (13) | C7  | C6  | C11 | C10 | 0.97 (15)   |
| C1 | C2  | C3  | C4  | -59.39 (11) | C7  | C8  | C9  | O1  | 179.82 (9)  |
| C1 | C2  | C3  | C13 | 83.52 (11)  | C7  | C8  | C9  | C10 | 0.89 (16)   |
| C1 | C2  | C3  | C14 | 151.24 (10) | C8  | C9  | C10 | C11 | -0.43 (16)  |
| C1 | C6  | C7  | C8  | -179.70 (9) | C9  | C10 | C11 | C6  | -0.52 (16)  |
| C1 | C6  | C11 | C10 | -179.88 (9) | C11 | C6  | C7  | C8  | -0.49 (16)  |
| C2 | C1  | C6  | C7  | -70.60 (12) | C12 | O1  | C9  | C8  | -           |
| C2 | C1  | C6  | C11 | 110.25 (11) | C12 | O1  | C9  | C10 | 179.73 (10) |
| C2 | C3  | C4  | C5  | 61.06 (11)  | C13 | C3  | C4  | C5  | -0.87 (15)  |
| C2 | C3  | C13 | C14 | 108.62 (11) | C13 | C3  | C14 | F1  | -82.58 (11) |
| C2 | C3  | C14 | F1  | 140.36 (10) | C13 | C3  | C14 | F2  | -           |
| C2 | C3  | C14 | F2  | 2.27 (15)   | C14 | C3  | C4  | C5  | 111.31 (12) |
| C2 | C3  | C14 | C13 | 108.33 (11) | C15 | O3  | C16 | C17 | 110.60 (12) |
| C3 | C4  | C5  | N1  | -50.94 (12) | C15 | O3  | C16 | C18 | -           |
| C3 | C13 | C14 | F1  | 111.32 (11) | C15 | O3  | C16 | C19 | 174.85 (10) |
| C3 | C13 | C14 | F2  | 110.92 (11) | C15 | N1  | C1  | C2  | -57.12 (14) |
| C4 | C3  | C13 | C14 | 111.04 (11) | C15 | N1  | C1  | C6  | 67.59 (13)  |
| C4 | C3  | C14 | F1  | -5.80 (16)  | C15 | N1  | C5  | C4  | 167.12 (9)  |
| C4 | C3  | C14 | F2  | 143.89 (10) | C16 | O3  | C15 | O2  | -66.43 (12) |
| C4 | C3  | C14 | C13 | 105.51 (11) | C16 | O3  | C15 | N1  | -162.53 (9) |
|    |     |     |     |             |     |     |     |     | -15.57 (16) |
|    |     |     |     |             |     |     |     |     | 166.02 (9)  |

**Table S-7 Hydrogen Atom Coordinates ( $\text{\AA}\times 10^4$ ) and Isotropic Displacement Parameters ( $\text{\AA}^2\times 10^3$ ) for OIC327s\_0m.**

| Atom | <i>x</i> | <i>y</i> | <i>z</i> | U(eq) |
|------|----------|----------|----------|-------|
| H1   | 6568.1   | 4366.12  | 3645.59  | 15    |
| H2A  | 8892.06  | 2593.17  | 4808.42  | 17    |
| H2B  | 7520.66  | 3597.82  | 5388.37  | 17    |
| H4A  | 4242.83  | 3216.68  | 6538.25  | 19    |
| H4B  | 3619.22  | 1943.26  | 6723.92  | 19    |
| H5A  | 2602.04  | 2438.06  | 4932.8   | 18    |
| H5B  | 1436.97  | 3565.87  | 5409.96  | 18    |
| H7   | 9621.93  | 3144.08  | 2773.23  | 20    |
| H8   | 10584.96 | 2029.61  | 1486.5   | 22    |
| H10  | 4838.9   | 1149.93  | 2001.75  | 19    |
| H11  | 3875.62  | 2301.26  | 3280.48  | 18    |
| H12A | 7795.62  | -180.66  | 22.08    | 35    |
| H12B | 5791.56  | 791.77   | 337.61   | 35    |
| H12C | 6817.39  | -401.4   | 1248.39  | 35    |
| H13A | 5776.11  | 274.18   | 5859.57  | 23    |
| H13B | 7901.89  | 534.98   | 5050.72  | 23    |
| H17A | 4865.37  | 7046.07  | 1344.38  | 52    |
| H17B | 4092.75  | 6902.5   | 251.04   | 52    |
| H17C | 5708     | 5796.44  | 1006.67  | 52    |
| H18A | 3101.11  | 4468.05  | 1130.82  | 55    |
| H18B | 1549.64  | 5604.25  | 369.87   | 55    |
| H18C | 688.72   | 4920.31  | 1537.34  | 55    |
| H19A | -409.37  | 6761.35  | 2184.39  | 46    |
| H19B | 337.28   | 7592.45  | 1060.26  | 46    |
| H19C | 1263.05  | 7548.52  | 2185.1   | 46    |

**Crystal structure determination of OIC327s\_0m**

**Crystal Data** for  $\text{C}_{19}\text{H}_{25}\text{F}_2\text{NO}_3$  ( $M = 353.40$  g/mol): triclinic, space group P-1 (no. 2),  $a = 6.496(3)$   $\text{\AA}$ ,  $b = 11.821(5)$   $\text{\AA}$ ,  $c = 12.772(5)$   $\text{\AA}$ ,  $\alpha = 73.748(8)^\circ$ ,  $\beta = 83.671(9)^\circ$ ,  $\gamma = 75.267(8)^\circ$ ,  $V = 909.8(6)$   $\text{\AA}^3$ ,  $Z = 2$ ,  $T = 100$  K,  $\mu(\text{MoK}\alpha) = 0.100$   $\text{mm}^{-1}$ ,  $D_{\text{calc}} = 1.290$   $\text{g/cm}^3$ , 36476 reflections measured ( $3.324^\circ \leq 2\theta \leq 57.834^\circ$ ), 4707 unique ( $R_{\text{int}} = 0.0802$ ,  $R_{\text{sigma}} = 0.0456$ ) which were used in all calculations. The final  $R_1$  was 0.0410 ( $I > 2\sigma(I)$ ) and  $wR_2$  was 0.1173 (all data).

## 10. X-Ray crystallography data for carbamate (S,S)-9c

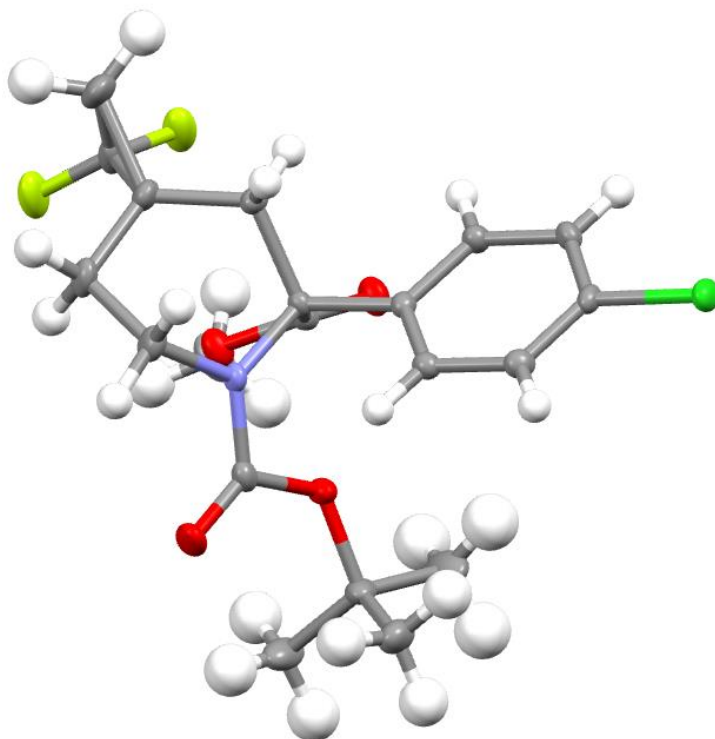

**Figure S-2** X-ray for (S,S)-9c

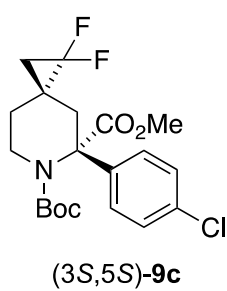

CCDC 2312679



**Table S-8 Crystal data and structure refinement for OIC326s\_0m (9c).**

|                                             |                                                                  |
|---------------------------------------------|------------------------------------------------------------------|
| Identification code                         | OIC326s_0m                                                       |
| Empirical formula                           | C <sub>20</sub> H <sub>24</sub> ClF <sub>2</sub> NO <sub>4</sub> |
| Formula weight                              | 415.85                                                           |
| Temperature/K                               | 100.00                                                           |
| Crystal system                              | monoclinic                                                       |
| Space group                                 | P2 <sub>1</sub>                                                  |
| a/Å                                         | 8.252(7)                                                         |
| b/Å                                         | 10.441(11)                                                       |
| c/Å                                         | 12.226(10)                                                       |
| α/°                                         | 90                                                               |
| β/°                                         | 100.816(10)                                                      |
| γ/°                                         | 90                                                               |
| Volume/Å <sup>3</sup>                       | 1034.7(16)                                                       |
| Z                                           | 2                                                                |
| ρ <sub>calc</sub> /cm <sup>3</sup>          | 1.335                                                            |
| μ/mm <sup>-1</sup>                          | 0.227                                                            |
| F(000)                                      | 436.0                                                            |
| Crystal size/mm <sup>3</sup>                | 0.334 × 0.254 × 0.177                                            |
| Radiation                                   | MoKα (λ = 0.71073)                                               |
| 2θ range for data collection/°              | 3.392 to 57.424                                                  |
| Index ranges                                | -10 ≤ h ≤ 11, -13 ≤ k ≤ 13, -16 ≤ l ≤ 16                         |
| Reflections collected                       | 19144                                                            |
| Independent reflections                     | 5317 [R <sub>int</sub> = 0.0481, R <sub>sigma</sub> = 0.0477]    |
| Data/restraints/parameters                  | 5317/1/257                                                       |
| Goodness-of-fit on F <sup>2</sup>           | 1.025                                                            |
| Final R indexes [I ≥ 2σ (I)]                | R <sub>1</sub> = 0.0347, wR <sub>2</sub> = 0.0751                |
| Final R indexes [all data]                  | R <sub>1</sub> = 0.0416, wR <sub>2</sub> = 0.0794                |
| Largest diff. peak/hole / e Å <sup>-3</sup> | 0.21/-0.22                                                       |
| Flack parameter                             | 0.02(3)                                                          |

**Table S-9 Fractional Atomic Coordinates ( $\times 10^4$ ) and Equivalent Isotropic Displacement Parameters ( $\text{\AA}^2 \times 10^3$ ) for OIC326s\_0m.  $U_{eq}$  is defined as 1/3 of the trace of the orthogonalised  $U_{ij}$  tensor.**

| Atom | <i>x</i>    | <i>y</i>    | <i>z</i>    | $U_{eq}$   |
|------|-------------|-------------|-------------|------------|
| Cl1  | 10921.3 (7) | 942.2 (5)   | 8359.8 (5)  | 22.88 (13) |
| F1   | 3661 (2)    | 8859.2 (15) | 8786.7 (14) | 34.8 (4)   |
| F2   | 6008.3 (19) | 8198.0 (15) | 9783.1 (13) | 33.4 (4)   |
| O1   | 8829 (2)    | 7015.3 (16) | 8243.5 (15) | 23.1 (4)   |
| O2   | 6395 (2)    | 7826.2 (15) | 7398.2 (14) | 22.1 (4)   |
| O3   | 4315 (2)    | 5668.5 (18) | 4950.8 (13) | 27.0 (4)   |
| O4   | 6996.3 (18) | 5905.8 (17) | 5823.9 (12) | 19.8 (3)   |
| N1   | 5103 (2)    | 5513.9 (17) | 6845.8 (15) | 15.5 (4)   |
| C1   | 6432 (3)    | 5602.4 (19) | 7833.8 (17) | 13.9 (4)   |
| C2   | 5607 (3)    | 5624 (2)    | 8882.9 (18) | 18.0 (5)   |
| C3   | 4174 (3)    | 6543 (2)    | 8786 (2)    | 20.8 (5)   |
| C4   | 2889 (3)    | 6409 (2)    | 7711 (2)    | 24.2 (5)   |
| C5   | 3398 (3)    | 5323 (2)    | 7011 (2)    | 21.3 (5)   |
| C6   | 7595 (3)    | 4442 (2)    | 7936.6 (18) | 14.6 (4)   |
| C7   | 8939 (3)    | 4350 (2)    | 8828.8 (18) | 17.7 (5)   |
| C8   | 9961 (3)    | 3281 (2)    | 8957.8 (19) | 18.6 (5)   |
| C9   | 9633 (3)    | 2290 (2)    | 8192.5 (19) | 16.9 (4)   |
| C10  | 8313 (3)    | 2339 (2)    | 7314.2 (19) | 18.0 (5)   |
| C11  | 7291 (3)    | 3416 (2)    | 7193.0 (19) | 16.4 (4)   |
| C12  | 7393 (3)    | 6869 (2)    | 7833.6 (18) | 16.3 (4)   |
| C13  | 7196 (4)    | 9067 (2)    | 7417 (3)    | 32.7 (6)   |
| C14  | 3573 (4)    | 6903 (3)    | 9882 (2)    | 34.1 (6)   |
| C15  | 4449 (3)    | 7823 (2)    | 9301 (2)    | 26.0 (6)   |
| C16  | 5376 (3)    | 5702 (2)    | 5789.0 (18) | 18.0 (5)   |
| C17  | 7703 (3)    | 5925 (3)    | 4796.3 (18) | 23.2 (5)   |
| C18  | 9505 (3)    | 6153 (4)    | 5265 (3)    | 42.9 (8)   |
| C19  | 7457 (4)    | 4624 (3)    | 4233 (2)    | 31.8 (6)   |
| C20  | 6961 (4)    | 7015 (3)    | 4036 (2)    | 36.7 (7)   |

**Table S-10 Anisotropic Displacement Parameters ( $\text{\AA}^2 \times 10^3$ ) for OIC326s\_0m. The Anisotropic displacement factor exponent takes the form: -  $2\pi^2[h^2a^{*2}U_{11}+2hka^*b^*U_{12}+\dots]$ .**

| Atom | U <sub>11</sub> | U <sub>22</sub> | U <sub>33</sub> | U <sub>23</sub> | U <sub>13</sub> | U <sub>12</sub> |
|------|-----------------|-----------------|-----------------|-----------------|-----------------|-----------------|
| Cl1  | 26.5 (3)        | 19.9 (2)        | 22.9 (3)        | 3.5 (2)         | 6.3 (2)         | 10.2 (2)        |
| F1   | 34.7 (9)        | 25.7 (7)        | 39.8 (9)        | -9.3 (7)        | -3.6 (7)        | 15.2 (7)        |
| F2   | 28.1 (9)        | 34.1 (9)        | 33.5 (9)        | -15.8 (7)       | -5.8 (7)        | 7.6 (7)         |
| O1   | 16.9 (9)        | 21.1 (9)        | 28.8 (9)        | 0.5 (7)         | -1.9 (7)        | -2.8 (6)        |
| O2   | 22.8 (9)        | 13.5 (7)        | 27.4 (9)        | 3.0 (7)         | -1.7 (7)        | -0.9 (6)        |
| O3   | 20.2 (9)        | 39.1 (11)       | 18.5 (8)        | -4.8 (7)        | -4.9 (7)        | 6.3 (7)         |
| O4   | 15.4 (8)        | 29.6 (8)        | 14.3 (7)        | 1.7 (7)         | 2.7 (6)         | 1.0 (8)         |
| N1   | 9.2 (9)         | 19.0 (9)        | 17.6 (9)        | -1.3 (7)        | 0.4 (7)         | 0.2 (7)         |
| C1   | 13.2 (10)       | 14.2 (10)       | 13.5 (10)       | -0.2 (7)        | 0.5 (8)         | 1.3 (7)         |
| C2   | 20.7 (12)       | 17.8 (11)       | 17.1 (10)       | 1.7 (8)         | 7.3 (9)         | 4.5 (8)         |
| C3   | 19.1 (12)       | 23.6 (12)       | 21.4 (12)       | -1.4 (9)        | 7.7 (10)        | 6.2 (9)         |
| C4   | 13.3 (11)       | 28.3 (12)       | 30.6 (13)       | -6.3 (10)       | 2.9 (10)        | 3.2 (9)         |
| C5   | 13.0 (11)       | 24.4 (12)       | 27.2 (13)       | -4.6 (10)       | 5.3 (10)        | -2.4 (9)        |
| C6   | 15.3 (11)       | 14.1 (10)       | 15.0 (10)       | 2.3 (8)         | 4.6 (8)         | 1.7 (8)         |
| C7   | 18.9 (12)       | 17.8 (10)       | 15.9 (11)       | -0.9 (8)        | 2.1 (9)         | 2.6 (9)         |
| C8   | 15.1 (12)       | 22.9 (11)       | 16.7 (11)       | 2.1 (9)         | 0.5 (9)         | 3.2 (9)         |
| C9   | 17.6 (12)       | 15.4 (10)       | 19.5 (11)       | 3.5 (8)         | 7.8 (9)         | 5.8 (8)         |
| C10  | 22.0 (13)       | 14.7 (10)       | 17.5 (11)       | 0.0 (8)         | 4.3 (9)         | 0.0 (9)         |
| C11  | 16.0 (12)       | 17.8 (10)       | 15.1 (11)       | 0.8 (8)         | 2.4 (9)         | -0.5 (8)        |
| C12  | 18.9 (12)       | 16.1 (10)       | 13.7 (10)       | 0.5 (8)         | 2.2 (9)         | 1.1 (9)         |
| C13  | 33.7 (16)       | 16.3 (12)       | 42.8 (16)       | 7.0 (11)        | -6.6 (13)       | -4.7 (10)       |
| C14  | 32.5 (16)       | 45.8 (16)       | 27.0 (14)       | -4.2 (12)       | 13.5 (12)       | 13.3 (13)       |
| C15  | 21.8 (13)       | 28.3 (13)       | 26.0 (13)       | -8.2 (10)       | -0.7 (11)       | 9.9 (10)        |
| C16  | 16.8 (11)       | 17.3 (11)       | 18.7 (10)       | -0.9 (8)        | 0.0 (9)         | 4.1 (8)         |
| C17  | 24.5 (12)       | 31.1 (12)       | 15.8 (10)       | 6.2 (11)        | 8.3 (9)         | 6.9 (11)        |
| C18  | 25.4 (15)       | 73 (2)          | 33.0 (15)       | 6.8 (15)        | 13.2 (12)       | -5.2 (15)       |
| C19  | 38.0 (17)       | 33.5 (14)       | 26.5 (14)       | 0.8 (11)        | 12.4 (12)       | 11.6 (12)       |
| C20  | 56 (2)          | 32.1 (15)       | 26.6 (14)       | 11.4 (12)       | 18.5 (14)       | 17.9 (14)       |

**Table S-11 Bond Lengths for OIC326s\_0m.**

| Atom | Atom | Length/Å  | Atom | Atom | Length/Å  |
|------|------|-----------|------|------|-----------|
| C11  | C9   | 1.753 (3) | C2   | C3   | 1.510 (3) |
| F1   | C15  | 1.355 (3) | C3   | C4   | 1.532 (4) |
| F2   | C15  | 1.368 (3) | C3   | C14  | 1.560 (3) |
| O1   | C12  | 1.207 (3) | C3   | C15  | 1.477 (4) |
| O2   | C12  | 1.340 (3) | C4   | C5   | 1.526 (3) |
| O2   | C13  | 1.453 (3) | C6   | C7   | 1.406 (3) |
| O3   | C16  | 1.217 (3) | C6   | C11  | 1.397 (3) |
| O4   | C16  | 1.346 (3) | C7   | C8   | 1.390 (3) |
| O4   | C17  | 1.481 (3) | C8   | C9   | 1.387 (3) |
| N1   | C1   | 1.474 (3) | C9   | C10  | 1.380 (3) |
| N1   | C5   | 1.472 (3) | C10  | C11  | 1.396 (3) |
| N1   | C16  | 1.367 (3) | C14  | C15  | 1.464 (4) |
| C1   | C2   | 1.561 (3) | C17  | C18  | 1.509 (4) |
| C1   | C6   | 1.536 (3) | C17  | C19  | 1.519 (4) |
| C1   | C12  | 1.542 (3) | C17  | C20  | 1.524 (4) |

**Table S-12 Bond Angles for OIC326s\_0m.**

| <b>Atom</b> | <b>Atom</b> | <b>Atom</b> | <b>Angle/°</b> | <b>Atom</b> | <b>Atom</b> | <b>Atom</b> | <b>Angle/°</b> |
|-------------|-------------|-------------|----------------|-------------|-------------|-------------|----------------|
| C12         | O2          | C13         | 114.5(2)       | C8          | C9          | C11         | 118.86(18)     |
| C16         | O4          | C17         | 121.46(17)     | C10         | C9          | C11         | 119.57(17)     |
| C5          | N1          | C1          | 118.63(19)     | C10         | C9          | C8          | 121.6(2)       |
| C16         | N1          | C1          | 122.45(19)     | C9          | C10         | C11         | 119.0(2)       |
| C16         | N1          | C5          | 118.72(18)     | C10         | C11         | C6          | 121.2(2)       |
| N1          | C1          | C2          | 107.62(18)     | O1          | C12         | O2          | 123.6(2)       |
| N1          | C1          | C6          | 112.02(17)     | O1          | C12         | C1          | 125.0(2)       |
| N1          | C1          | C12         | 110.92(17)     | O2          | C12         | C1          | 111.21(19)     |
| C6          | C1          | C2          | 107.83(17)     | C15         | C14         | C3          | 58.35(17)      |
| C6          | C1          | C12         | 111.27(18)     | F1          | C15         | F2          | 107.6(2)       |
| C12         | C1          | C2          | 106.93(17)     | F1          | C15         | C3          | 120.2(2)       |
| C3          | C2          | C1          | 113.60(18)     | F1          | C15         | C14         | 120.8(2)       |
| C2          | C3          | C4          | 114.5(2)       | F2          | C15         | C3          | 120.0(2)       |
| C2          | C3          | C14         | 117.2(2)       | F2          | C15         | C14         | 119.3(2)       |
| C4          | C3          | C14         | 118.6(2)       | C14         | C15         | C3          | 64.10(18)      |
| C15         | C3          | C2          | 119.1(2)       | O3          | C16         | O4          | 125.8(2)       |
| C15         | C3          | C4          | 118.3(2)       | O3          | C16         | N1          | 124.9(2)       |
| C15         | C3          | C14         | 57.54(18)      | O4          | C16         | N1          | 109.37(18)     |
| C5          | C4          | C3          | 109.2(2)       | O4          | C17         | C18         | 101.36(19)     |
| N1          | C5          | C4          | 110.35(19)     | O4          | C17         | C19         | 109.4(2)       |
| C7          | C6          | C1          | 120.51(19)     | O4          | C17         | C20         | 110.5(2)       |
| C11         | C6          | C1          | 121.2(2)       | C18         | C17         | C19         | 110.6(2)       |
| C11         | C6          | C7          | 118.1(2)       | C18         | C17         | C20         | 111.6(3)       |
| C8          | C7          | C6          | 121.1(2)       | C19         | C17         | C20         | 112.8(2)       |
| C9          | C8          | C7          | 119.0(2)       |             |             |             |                |

**Table S-13 Torsion Angles for OIC326s\_0m.**

| A   | B   | C      | D   | Angle/°     | A     | B      | C     | D   | Angle/°     |
|-----|-----|--------|-----|-------------|-------|--------|-------|-----|-------------|
| C11 | C9  | C10    | C11 | 179.74 (17) | C5    | N1     | C1    | C12 | -123.3 (2)  |
| N1  | C1  | C2     | C3  | -46.9 (2)   | C5    | N1     | C16O3 |     | -3.5 (3)    |
| N1  | C1  | C6     | C7  | 179.83 (19) | C5    | N1     | C16O4 |     | 177.57 (18) |
| N1  | C1  | C6     | C11 | -4.0 (3)    | C6    | C1     | C2    | C3  | 167.92 (19) |
| N1  | C1  | C12O1  |     | -150.3 (2)  | C6    | C1     | C12O1 |     | -24.9 (3)   |
| N1  | C1  | C12O2  |     | 34.8 (2)    | C6    | C1     | C12O2 |     | 160.21 (18) |
| C1  | N1  | C5     | C4  | 58.3 (3)    | C6    | C7     | C8    | C9  | -0.4 (3)    |
| C1  | N1  | C16O3  |     | -178.2 (2)  | C7    | C6     | C11   | C10 | -1.4 (3)    |
| C1  | N1  | C16O4  |     | 2.8 (3)     | C7    | C8     | C9    | C11 | 179.87 (17) |
| C1  | C2  | C3     | C4  | 50.2 (3)    | C7    | C8     | C9    | C10 | -0.5 (3)    |
| C1  | C2  | C3     | C14 | -164.3 (2)  | C8    | C9     | C10   | C11 | 0.4 (3)     |
| C1  | C2  | C3     | C15 | -98.1 (3)   | C9    | C10    | C11   | C6  | 0.6 (3)     |
| C1  | C6  | C7     | C8  | 177.3 (2)   | C11   | C6     | C7    | C8  | 1.3 (3)     |
| C1  | C6  | C11    | C10 | -177.4 (2)  | C12   | C1     | C2    | C3  | 72.3 (2)    |
| C2  | C1  | C6     | C7  | -61.6 (3)   | C12   | C1     | C6    | C7  | 55.4 (3)    |
| C2  | C1  | C6     | C11 | 114.3 (2)   | C12   | C1     | C6    | C11 | -128.8 (2)  |
| C2  | C1  | C12O1  |     | 92.6 (3)    | C13O2 | C12O1  |       |     | 2.3 (3)     |
| C2  | C1  | C12O2  |     | -82.3 (2)   | C13O2 | C12C1  |       |     | 177.3 (2)   |
| C2  | C3  | C4     | C5  | 1.3 (3)     | C14C3 | C4     | C5    |     | -143.8 (2)  |
| C2  | C3  | C14C15 |     | 108.7 (3)   | C14C3 | C15F1  |       |     | -112.0 (3)  |
| C2  | C3  | C15F1  |     | 142.6 (2)   | C14C3 | C15F2  |       |     | 110.4 (3)   |
| C2  | C3  | C15F2  |     | 5.0 (4)     | C15C3 | C4     | C5    |     | 149.8 (2)   |
| C2  | C3  | C15C14 |     | -105.4 (3)  | C16O4 | C17C18 |       |     | -178.9 (2)  |
| C3  | C4  | C5     | N1  | -52.8 (3)   | C16O4 | C17C19 |       |     | -62.1 (3)   |
| C3  | C14 | C15F1  |     | 111.2 (3)   | C16O4 | C17C20 |       |     | 62.7 (3)    |
| C3  | C14 | C15F2  |     | -111.4 (2)  | C16N1 | C1     | C2    |     | 168.12 (18) |
| C4  | C3  | C14C15 |     | -107.1 (3)  | C16N1 | C1     | C6    |     | -73.5 (2)   |
| C4  | C3  | C15F1  |     | -4.5 (4)    | C16N1 | C1     | C12   |     | 51.5 (3)    |
| C4  | C3  | C15F2  |     | -142.1 (2)  | C16N1 | C5     | C4    |     | -116.6 (2)  |
| C4  | C3  | C15C14 |     | 107.5 (3)   | C17O4 | C16O3  |       |     | -9.3 (3)    |
| C5  | N1  | C1     | C2  | -6.6 (2)    | C17O4 | C16N1  |       |     | 169.7 (2)   |
| C5  | N1  | C1     | C6  | 111.7 (2)   |       |        |       |     |             |

**Table S-14 Hydrogen Atom Coordinates ( $\text{\AA}\times 10^4$ ) and Isotropic Displacement Parameters ( $\text{\AA}^2\times 10^3$ ) for OIC326s\_0m.**

| Atom | <i>x</i> | <i>y</i> | <i>z</i> | U(eq) |
|------|----------|----------|----------|-------|
| H2A  | 5214.88  | 4750.63  | 9011.38  | 22    |
| H2B  | 6448.53  | 5863.17  | 9539.79  | 22    |
| H4A  | 1793.29  | 6222.13  | 7893.41  | 29    |
| H4B  | 2808.96  | 7220.76  | 7286.05  | 29    |
| H5A  | 3314.03  | 4494.9   | 7389.8   | 26    |
| H5B  | 2643.69  | 5296.77  | 6278.87  | 26    |
| H7   | 9152.82  | 5029.91  | 9352.43  | 21    |
| H8   | 10869.98 | 3229.11  | 9561.24  | 22    |
| H10  | 8101.44  | 1649.8   | 6799.64  | 22    |
| H11  | 6373.86  | 3451.6   | 6594.12  | 20    |
| H13A | 8121.69  | 9009.99  | 7020     | 49    |
| H13B | 7607.17  | 9323.95  | 8189.75  | 49    |
| H13C | 6401.46  | 9703     | 7052.36  | 49    |
| H14A | 2374.79  | 7032.01  | 9844.8   | 41    |
| H14B | 4171.63  | 6532.96  | 10589.16 | 41    |
| H18A | 9643.71  | 7003.61  | 5607.91  | 64    |
| H18B | 10138.35 | 6103.04  | 4663.45  | 64    |
| H18C | 9903.31  | 5499.87  | 5826.85  | 64    |
| H19A | 7981.81  | 3961.99  | 4749.3   | 48    |
| H19B | 7955.62  | 4626.13  | 3566.47  | 48    |
| H19C | 6273.73  | 4443.72  | 4021.21  | 48    |
| H20A | 5811.32  | 6812.37  | 3711.58  | 55    |
| H20B | 7592.08  | 7125.06  | 3438.7   | 55    |
| H20C | 7001.6   | 7808.46  | 4468.2   | 55    |

**Crystal structure determination of OIC326s\_0m**

**Crystal Data** for  $\text{C}_{20}\text{H}_{24}\text{ClF}_2\text{NO}_4$  ( $M=415.85$  g/mol): monoclinic, space group  $P2_1$  (no. 4),  $a = 8.252(7)$   $\text{\AA}$ ,  $b = 10.441(11)$   $\text{\AA}$ ,  $c = 12.226(10)$   $\text{\AA}$ ,  $\beta = 100.816(10)^\circ$ ,  $V = 1034.7(16)$   $\text{\AA}^3$ ,  $Z = 2$ ,  $T = 100.00$  K,  $\mu(\text{MoK}\alpha) = 0.227$   $\text{mm}^{-1}$ ,  $D_{\text{calc}} = 1.335$   $\text{g/cm}^3$ , 19144 reflections measured ( $3.392^\circ \leq 2\theta \leq 57.424^\circ$ ), 5317 unique ( $R_{\text{int}} = 0.0481$ ,  $R_{\text{sigma}} = 0.0477$ ) which were used in all calculations. The final  $R_1$  was 0.0347 ( $I > 2\sigma(I)$ ) and  $wR_2$  was 0.0794 (all data).

## 11. DFT data

DFT calculations on structure (3*S*,5*S*)-**9c** were carried out using the methods described in the general procedures. Having obtained the X-ray crystal structure for compound (3*S*,5*S*)-**9c** a frequency calculation was performed. The outcome of this calculation showed 27 imaginary frequencies indicating that this structure was not optimised. An optimisation calculation was then performed to give the structure shown in Figure S-3a. The next calculations performed were optimisation calculations on the chair conformations of (3*S*,5*S*)-**9c**. In line with previous work, the *p*-chlorophenyl group could adopt an axial or equatorial position. Optimisation of the axial chair conformation gave the structure shown in Figure S-3b, while optimisation of the equatorial chair conformation gave the structure shown in Figure S-3c.

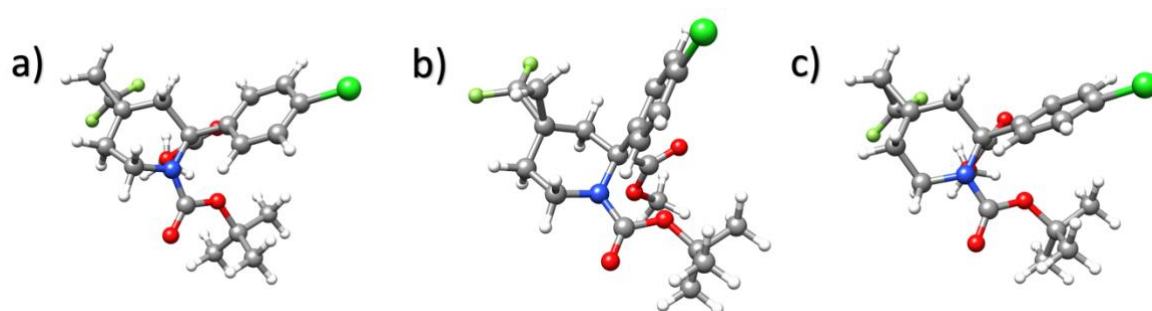

**Figure S-3.** Calculated conformations of **9c**



Frequency Calculation Performed on X-ray Crystal Structure of (3S,5S)-9c:

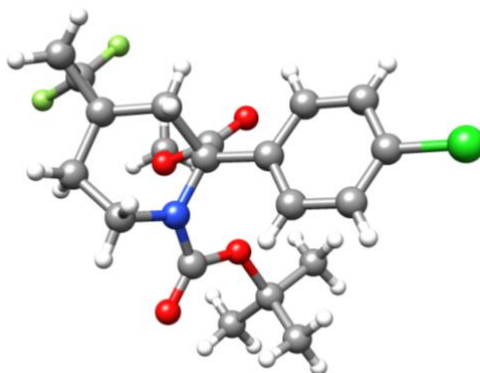

Route : # freq b3lyp scrf=(solvent=thf) geom=connectivity def2tzvp  
empiricaldispersion=gd3bj int=ultrafine pop=(regular,mk)

SMILES : COC(=O)C2(c1ccc(Cl)cc1)CC3(CCN2C(=O)OC(C)(C)C)CC3(F)F

Formula : C<sub>20</sub>H<sub>24</sub>ClF<sub>2</sub>NO<sub>4</sub>

Charge : 0

Multiplicity : 1

Dipole : 2.7865 Debye

Energy : -1792.56472910 a.u.

Gibbs Energy : -1792.191838 a.u.

Number of imaginary frequencies : 27

Cartesian Coordinates (XYZ format)

52

|    |             |             |             |
|----|-------------|-------------|-------------|
| Cl | 5.43056000  | -2.36082400 | 0.06740900  |
| F  | -4.71669900 | -0.72066600 | 0.17985800  |
| F  | -3.36185100 | -1.87464000 | 1.46813500  |
| O  | -0.38403600 | -0.26153300 | 2.28099700  |
| O  | -1.95914100 | 0.76429700  | 1.05349700  |
| O  | -0.40511400 | 2.60224300  | -1.98854100 |
| O  | 0.46310900  | 1.94200000  | 0.01652700  |
| N  | -0.59879100 | 0.44956200  | -1.22721400 |
| C  | -0.35745400 | -0.52472900 | -0.14754700 |
| C  | -1.20188100 | -1.79878600 | -0.46464600 |
| H  | -0.76708500 | -2.29505600 | -1.20265800 |
| H  | -1.20501400 | -2.38627500 | 0.33230000  |
| C  | -2.62942500 | -1.49688000 | -0.85382100 |
| C  | -2.77900600 | -0.43485000 | -1.94836000 |
| H  | -3.26888600 | -0.81536000 | -2.72053400 |
| H  | -3.29663500 | 0.33426700  | -1.60152800 |
| C  | -1.39434700 | 0.02912100  | -2.39214100 |
| H  | -0.93117300 | -0.70857800 | -2.86134400 |
| H  | -1.48480800 | 0.78715900  | -3.02260900 |
| C  | 1.11790900  | -0.94530000 | -0.07055000 |

|   |             |             |             |
|---|-------------|-------------|-------------|
| C | 1.54552500  | -1.87268200 | 0.89493500  |
| H | 0.92170200  | -2.21017300 | 1.52698600  |
| C | 2.86600900  | -2.30417700 | 0.94083900  |
| H | 3.14708200  | -2.92772500 | 1.59988600  |
| C | 3.76758100  | -1.81143400 | 0.00882400  |
| C | 3.38090500  | -0.91303100 | -0.96407200 |
| H | 4.00973200  | -0.58903200 | -1.59845700 |
| C | 2.05114700  | -0.48762700 | -1.00383000 |
| H | 1.77691600  | 0.12410700  | -1.67678900 |
| C | -0.85592900 | 0.01905500  | 1.20657900  |
| C | -2.52742500 | 1.26180500  | 2.29432900  |
| H | -1.85187300 | 1.78514700  | 2.77552600  |
| H | -2.81153500 | 0.50668500  | 2.84970500  |
| H | -3.29971800 | 1.83079800  | 2.09513000  |
| C | -3.64190000 | -2.68262100 | -0.82124300 |
| H | -4.34944000 | -2.70846800 | -1.51385300 |
| H | -3.31088200 | -3.56822400 | -0.52693600 |
| C | -3.69017500 | -1.60461300 | 0.16774200  |
| C | -0.20208800 | 1.75448700  | -1.13923600 |
| C | 1.20601600  | 3.19465600  | 0.28637900  |
| C | 1.78069500  | 2.91075400  | 1.65224600  |
| H | 1.05272600  | 2.83418400  | 2.30325200  |
| H | 2.37742200  | 3.64321200  | 1.91387400  |
| H | 2.28609500  | 2.07166000  | 1.62614800  |
| C | 2.31673200  | 3.35305000  | -0.73803100 |
| H | 2.91198400  | 2.57510800  | -0.69739500 |
| H | 2.82754800  | 4.16572400  | -0.54349100 |
| H | 1.92677700  | 3.41852200  | -1.63506600 |
| C | 0.25488600  | 4.38425900  | 0.31370700  |
| H | -0.05712700 | 4.57411100  | -0.59597700 |
| H | 0.72296600  | 5.16869400  | 0.66861700  |
| H | -0.51300700 | 4.17554500  | 0.88537200  |

### Frequencies

| Mode | IR frequency   | IR intensity | Raman intensity |
|------|----------------|--------------|-----------------|
| 1    | -1174.74300000 | 0.00870000   | 0.00000000      |
| 2    | -1157.96740000 | 0.10420000   | 0.00000000      |
| 3    | -1149.93500000 | 0.16890000   | 0.00000000      |
| 4    | -1144.78150000 | 0.23660000   | 0.00000000      |
| 5    | -1128.77130000 | 106.27340000 | 0.00000000      |
| 6    | -1088.01860000 | 1.43420000   | 0.00000000      |
| 7    | -943.36000000  | 0.31150000   | 0.00000000      |
| 8    | -922.96370000  | 0.01060000   | 0.00000000      |
| 9    | -808.85400000  | 5.91640000   | 0.00000000      |
| 10   | -776.11590000  | 9.40980000   | 0.00000000      |
| 11   | -733.63380000  | 7.84850000   | 0.00000000      |
| 12   | -726.48290000  | 2.33870000   | 0.00000000      |
| 13   | -707.67610000  | 0.91630000   | 0.00000000      |
| 14   | -692.00510000  | 2.75400000   | 0.00000000      |
| 15   | -681.77640000  | 0.48340000   | 0.00000000      |

|    |               |             |            |
|----|---------------|-------------|------------|
| 16 | -651.04390000 | 0.09970000  | 0.00000000 |
| 17 | -642.05040000 | 0.68330000  | 0.00000000 |
| 18 | -631.77940000 | 0.65210000  | 0.00000000 |
| 19 | -558.93200000 | 6.56310000  | 0.00000000 |
| 20 | -530.49910000 | 10.38890000 | 0.00000000 |
| 21 | -512.48120000 | 2.07940000  | 0.00000000 |
| 22 | -414.48710000 | 2.74600000  | 0.00000000 |
| 23 | -373.55030000 | 0.96930000  | 0.00000000 |
| 24 | -301.20280000 | 17.39370000 | 0.00000000 |
| 25 | -184.70070000 | 15.22260000 | 0.00000000 |
| 26 | -89.76540000  | 1.12910000  | 0.00000000 |
| 27 | -71.33890000  | 1.17770000  | 0.00000000 |
| 28 | 70.29710000   | 0.33240000  | 0.00000000 |
| 29 | 85.60560000   | 0.33530000  | 0.00000000 |
| 30 | 106.64320000  | 4.77730000  | 0.00000000 |
| 31 | 116.30570000  | 4.17070000  | 0.00000000 |
| 32 | 125.85800000  | 1.12700000  | 0.00000000 |
| 33 | 131.07460000  | 3.19380000  | 0.00000000 |
| 34 | 137.88590000  | 0.82690000  | 0.00000000 |
| 35 | 169.67990000  | 2.44230000  | 0.00000000 |
| 36 | 183.82190000  | 2.73830000  | 0.00000000 |
| 37 | 221.52050000  | 0.32660000  | 0.00000000 |
| 38 | 223.37840000  | 0.11720000  | 0.00000000 |
| 39 | 229.52260000  | 2.64270000  | 0.00000000 |
| 40 | 245.23870000  | 4.19990000  | 0.00000000 |
| 41 | 254.29080000  | 8.25860000  | 0.00000000 |
| 42 | 276.30000000  | 2.04790000  | 0.00000000 |
| 43 | 304.14350000  | 17.54150000 | 0.00000000 |
| 44 | 349.69460000  | 1.84810000  | 0.00000000 |
| 45 | 362.52270000  | 4.07530000  | 0.00000000 |
| 46 | 376.75950000  | 5.23860000  | 0.00000000 |
| 47 | 385.16200000  | 0.05710000  | 0.00000000 |
| 48 | 419.04790000  | 2.89630000  | 0.00000000 |
| 49 | 428.01610000  | 26.16340000 | 0.00000000 |
| 50 | 437.06420000  | 31.97110000 | 0.00000000 |
| 51 | 498.75400000  | 10.33450000 | 0.00000000 |
| 52 | 519.55760000  | 20.37250000 | 0.00000000 |
| 53 | 521.80630000  | 7.60370000  | 0.00000000 |
| 54 | 536.13840000  | 3.95740000  | 0.00000000 |
| 55 | 546.05910000  | 0.10790000  | 0.00000000 |
| 56 | 573.00980000  | 3.20470000  | 0.00000000 |
| 57 | 587.13490000  | 9.80140000  | 0.00000000 |
| 58 | 595.80370000  | 6.23000000  | 0.00000000 |

|     |               |              |            |
|-----|---------------|--------------|------------|
| 59  | 600.45030000  | 1.53030000   | 0.00000000 |
| 60  | 609.40890000  | 2.37930000   | 0.00000000 |
| 61  | 633.67610000  | 2.56070000   | 0.00000000 |
| 62  | 637.52480000  | 0.46170000   | 0.00000000 |
| 63  | 662.32040000  | 4.57330000   | 0.00000000 |
| 64  | 682.42070000  | 17.81500000  | 0.00000000 |
| 65  | 705.76860000  | 2.25720000   | 0.00000000 |
| 66  | 717.05010000  | 2.82970000   | 0.00000000 |
| 67  | 720.02390000  | 10.55850000  | 0.00000000 |
| 68  | 723.37280000  | 0.98190000   | 0.00000000 |
| 69  | 725.81070000  | 2.28710000   | 0.00000000 |
| 70  | 758.48910000  | 4.95330000   | 0.00000000 |
| 71  | 762.92920000  | 27.60720000  | 0.00000000 |
| 72  | 783.79060000  | 1.73870000   | 0.00000000 |
| 73  | 786.66360000  | 37.75430000  | 0.00000000 |
| 74  | 791.94300000  | 13.82650000  | 0.00000000 |
| 75  | 819.29130000  | 7.53590000   | 0.00000000 |
| 76  | 828.70850000  | 7.16780000   | 0.00000000 |
| 77  | 850.32510000  | 1.84610000   | 0.00000000 |
| 78  | 855.14510000  | 5.38700000   | 0.00000000 |
| 79  | 884.28950000  | 9.76160000   | 0.00000000 |
| 80  | 903.73720000  | 27.41740000  | 0.00000000 |
| 81  | 904.78520000  | 39.39540000  | 0.00000000 |
| 82  | 906.79320000  | 67.62750000  | 0.00000000 |
| 83  | 914.46930000  | 8.86210000   | 0.00000000 |
| 84  | 944.36900000  | 22.84440000  | 0.00000000 |
| 85  | 944.95220000  | 34.55090000  | 0.00000000 |
| 86  | 963.87160000  | 100.22630000 | 0.00000000 |
| 87  | 989.06420000  | 93.18390000  | 0.00000000 |
| 88  | 999.52550000  | 80.28880000  | 0.00000000 |
| 89  | 1033.45260000 | 291.62640000 | 0.00000000 |
| 90  | 1037.33230000 | 140.35110000 | 0.00000000 |
| 91  | 1041.87370000 | 132.36380000 | 0.00000000 |
| 92  | 1054.26690000 | 16.75810000  | 0.00000000 |
| 93  | 1061.88110000 | 39.03940000  | 0.00000000 |
| 94  | 1067.72130000 | 130.49660000 | 0.00000000 |
| 95  | 1081.82870000 | 47.51680000  | 0.00000000 |
| 96  | 1121.64990000 | 14.84990000  | 0.00000000 |
| 97  | 1156.70660000 | 164.99260000 | 0.00000000 |
| 98  | 1158.53450000 | 59.81970000  | 0.00000000 |
| 99  | 1163.16430000 | 65.98820000  | 0.00000000 |
| 100 | 1178.15440000 | 17.54420000  | 0.00000000 |
| 101 | 1180.26030000 | 87.67850000  | 0.00000000 |

|     |               |              |            |
|-----|---------------|--------------|------------|
| 102 | 1183.52700000 | 75.68540000  | 0.00000000 |
| 103 | 1187.74470000 | 4.83060000   | 0.00000000 |
| 104 | 1206.39460000 | 79.80430000  | 0.00000000 |
| 105 | 1215.84800000 | 2.94700000   | 0.00000000 |
| 106 | 1220.59120000 | 16.73420000  | 0.00000000 |
| 107 | 1223.43460000 | 0.60300000   | 0.00000000 |
| 108 | 1228.06700000 | 19.87070000  | 0.00000000 |
| 109 | 1233.26570000 | 32.13610000  | 0.00000000 |
| 110 | 1238.38270000 | 23.89550000  | 0.00000000 |
| 111 | 1239.71260000 | 44.49000000  | 0.00000000 |
| 112 | 1276.93990000 | 48.64020000  | 0.00000000 |
| 113 | 1280.71450000 | 13.56380000  | 0.00000000 |
| 114 | 1284.37680000 | 66.69480000  | 0.00000000 |
| 115 | 1290.47280000 | 293.01340000 | 0.00000000 |
| 116 | 1305.03140000 | 15.58280000  | 0.00000000 |
| 117 | 1307.01000000 | 9.15840000   | 0.00000000 |
| 118 | 1326.75390000 | 26.65240000  | 0.00000000 |
| 119 | 1368.78760000 | 47.76420000  | 0.00000000 |
| 120 | 1375.71790000 | 65.44900000  | 0.00000000 |
| 121 | 1395.84620000 | 499.30230000 | 0.00000000 |
| 122 | 1453.64180000 | 201.86960000 | 0.00000000 |
| 123 | 1549.46720000 | 30.84510000  | 0.00000000 |
| 124 | 1596.83500000 | 9.84100000   | 0.00000000 |
| 125 | 1721.10510000 | 931.92280000 | 0.00000000 |
| 126 | 1761.26330000 | 259.60030000 | 0.00000000 |
| 127 | 4055.43340000 | 19.54200000  | 0.00000000 |
| 128 | 4057.07410000 | 0.70770000   | 0.00000000 |
| 129 | 4059.84000000 | 3.03070000   | 0.00000000 |
| 130 | 4066.31190000 | 27.31360000  | 0.00000000 |
| 131 | 4117.36250000 | 10.02420000  | 0.00000000 |
| 132 | 4118.35120000 | 16.16810000  | 0.00000000 |
| 133 | 4121.91330000 | 9.75440000   | 0.00000000 |
| 134 | 4130.02080000 | 23.80940000  | 0.00000000 |
| 135 | 4141.51680000 | 6.37650000   | 0.00000000 |
| 136 | 4147.33140000 | 1.20220000   | 0.00000000 |
| 137 | 4155.52330000 | 7.41090000   | 0.00000000 |
| 138 | 4187.60420000 | 0.02220000   | 0.00000000 |
| 139 | 4263.92640000 | 4.53180000   | 0.00000000 |
| 140 | 4265.92180000 | 7.12910000   | 0.00000000 |
| 141 | 4268.58550000 | 8.07190000   | 0.00000000 |
| 142 | 4270.06940000 | 7.44580000   | 0.00000000 |
| 143 | 4271.22720000 | 25.60240000  | 0.00000000 |
| 144 | 4274.04020000 | 9.55720000   | 0.00000000 |

|     |               |             |            |
|-----|---------------|-------------|------------|
| 145 | 4274.16430000 | 19.62820000 | 0.00000000 |
| 146 | 4287.23820000 | 4.79500000  | 0.00000000 |
| 147 | 4624.11790000 | 0.33110000  | 0.00000000 |
| 148 | 4626.26930000 | 0.16050000  | 0.00000000 |
| 149 | 4633.27030000 | 0.18570000  | 0.00000000 |
| 150 | 4634.99030000 | 0.28080000  | 0.00000000 |

Optimisation Calculation Performed on X-ray Crystal Structure of (3S,5S)-9c (Figure S-3a):

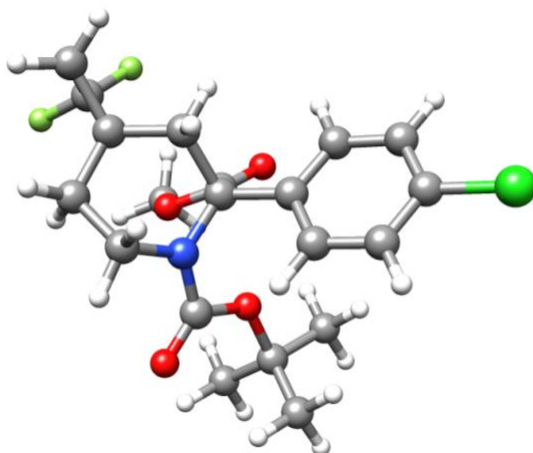

Route : # opt freq b3lyp scrf=(solvent=thf) geom=connectivity def2tzvp  
empiricaldispersion=gd3bj int=ultrafine pop=(regular,mk)

SMILES : COC(=O)C2(c1ccc(Cl)cc1)CC3(CCN2C(=O)OC(C)(C)C)CC3(F)F

Formula : C<sub>20</sub>H<sub>24</sub>ClF<sub>2</sub>NO<sub>4</sub>

Charge : 0

Multiplicity : 1

Dipole : 2.7554 Debye

Energy : -1792.79065084 a.u.

Gibbs Energy : -1792.432752 a.u.

Number of imaginary frequencies : 0

Cartesian Coordinates (XYZ format)

52

|    |             |             |             |
|----|-------------|-------------|-------------|
| Cl | -5.48230300 | -2.28995500 | -0.09668500 |
| F  | 4.70059600  | -0.86694800 | -0.19402100 |
| F  | 3.30555100  | -1.94314200 | -1.51342200 |
| O  | 0.36233100  | -0.13561400 | -2.26482100 |
| O  | 1.96272800  | 0.76259500  | -0.98221300 |
| O  | 0.42453200  | 2.54326400  | 2.04864400  |
| O  | -0.48832700 | 1.93918100  | 0.05284800  |
| N  | 0.57187500  | 0.40346200  | 1.25475400  |
| C  | 0.32034300  | -0.53090600 | 0.15438100  |
| C  | 1.14196100  | -1.82938000 | 0.41608800  |
| H  | 0.64319700  | -2.37767500 | 1.21578600  |
| H  | 1.08300500  | -2.45313300 | -0.47276700 |
| C  | 2.57931100  | -1.57499700 | 0.81251600  |
| C  | 2.74553100  | -0.52966200 | 1.91405000  |
| H  | 3.29164300  | -0.94289900 | 2.76319000  |
| H  | 3.31375600  | 0.32060200  | 1.53733800  |
| C  | 1.38047800  | -0.04162800 | 2.38455400  |
| H  | 0.85052400  | -0.83000500 | 2.92467000  |
| H  | 1.48477300  | 0.80348500  | 3.05634600  |

|   |             |             |             |
|---|-------------|-------------|-------------|
| C | -1.15304800 | -0.93625800 | 0.06256300  |
| C | -1.60316600 | -1.77768600 | -0.95605700 |
| H | -0.92664500 | -2.10573200 | -1.72911200 |
| C | -2.92600300 | -2.19440600 | -1.01179600 |
| H | -3.26324300 | -2.83911800 | -1.81091100 |
| C | -3.81170600 | -1.77392100 | -0.03094400 |
| C | -3.38803900 | -0.95544300 | 1.00341100  |
| H | -4.08169600 | -0.63803200 | 1.76892700  |
| C | -2.06102500 | -0.54682700 | 1.04280500  |
| H | -1.74179900 | 0.08622400  | 1.85672200  |
| C | 0.84258200  | 0.06443300  | -1.17897500 |
| C | 2.58684200  | 1.31124400  | -2.15595900 |
| H | 1.90768400  | 2.00254800  | -2.65180300 |
| H | 2.86413300  | 0.51312100  | -2.84140700 |
| H | 3.46878300  | 1.83199000  | -1.79732600 |
| C | 3.53478100  | -2.79106700 | 0.77268900  |
| H | 4.29668200  | -2.84506600 | 1.53891400  |
| H | 3.12984900  | -3.73714800 | 0.43861800  |
| C | 3.63524400  | -1.70627600 | -0.21479200 |
| C | 0.18905500  | 1.71447500  | 1.18732900  |
| C | -1.07477400 | 3.24602600  | -0.28222100 |
| C | -1.73648600 | 2.97013500  | -1.62589000 |
| H | -0.99668300 | 2.65241800  | -2.36041600 |
| H | -2.22467900 | 3.87465500  | -1.98897800 |
| H | -2.48444400 | 2.18323700  | -1.52765100 |
| C | -2.11459900 | 3.62656500  | 0.76450500  |
| H | -2.84840000 | 2.82676700  | 0.87342900  |
| H | -2.63717700 | 4.52727100  | 0.43963500  |
| H | -1.65196800 | 3.81905000  | 1.72902300  |
| C | 0.02744100  | 4.28835700  | -0.42086300 |
| H | 0.50789700  | 4.48274800  | 0.53443300  |
| H | -0.40284600 | 5.21838300  | -0.79498100 |
| H | 0.77990600  | 3.95003900  | -1.13437400 |

### Frequencies

| Mode | IR frequency | IR intensity | Raman intensity |
|------|--------------|--------------|-----------------|
| 1    | 21.93750000  | 0.14830000   | 0.00000000      |
| 2    | 35.65980000  | 0.16290000   | 0.00000000      |
| 3    | 40.11980000  | 0.67570000   | 0.00000000      |
| 4    | 48.19430000  | 0.57080000   | 0.00000000      |
| 5    | 51.70700000  | 2.45230000   | 0.00000000      |
| 6    | 65.53270000  | 1.23520000   | 0.00000000      |
| 7    | 82.02640000  | 2.83240000   | 0.00000000      |
| 8    | 89.11030000  | 1.51550000   | 0.00000000      |
| 9    | 93.18090000  | 2.61500000   | 0.00000000      |
| 10   | 106.71680000 | 0.90140000   | 0.00000000      |
| 11   | 119.60210000 | 0.69090000   | 0.00000000      |
| 12   | 134.20370000 | 0.95190000   | 0.00000000      |
| 13   | 141.58170000 | 0.74540000   | 0.00000000      |
| 14   | 149.16490000 | 0.51510000   | 0.00000000      |



|    |              |             |            |
|----|--------------|-------------|------------|
| 15 | 168.61400000 | 1.04150000  | 0.00000000 |
| 16 | 184.08900000 | 0.08920000  | 0.00000000 |
| 17 | 199.60250000 | 0.85770000  | 0.00000000 |
| 18 | 206.91990000 | 1.75290000  | 0.00000000 |
| 19 | 210.37280000 | 4.74050000  | 0.00000000 |
| 20 | 233.00130000 | 0.47280000  | 0.00000000 |
| 21 | 238.12750000 | 5.06020000  | 0.00000000 |
| 22 | 247.34250000 | 0.22220000  | 0.00000000 |
| 23 | 261.54390000 | 5.83050000  | 0.00000000 |
| 24 | 269.93400000 | 0.97690000  | 0.00000000 |
| 25 | 286.17500000 | 2.28120000  | 0.00000000 |
| 26 | 324.23620000 | 6.91930000  | 0.00000000 |
| 27 | 342.22590000 | 0.72840000  | 0.00000000 |
| 28 | 345.46560000 | 4.03530000  | 0.00000000 |
| 29 | 353.73770000 | 3.42370000  | 0.00000000 |
| 30 | 361.83800000 | 15.42260000 | 0.00000000 |
| 31 | 371.92920000 | 9.01830000  | 0.00000000 |
| 32 | 378.96010000 | 15.96920000 | 0.00000000 |
| 33 | 401.55640000 | 6.31240000  | 0.00000000 |
| 34 | 419.49040000 | 2.65540000  | 0.00000000 |
| 35 | 427.06540000 | 0.41090000  | 0.00000000 |
| 36 | 434.21790000 | 5.57200000  | 0.00000000 |
| 37 | 442.78680000 | 7.13160000  | 0.00000000 |
| 38 | 460.88060000 | 13.70540000 | 0.00000000 |
| 39 | 466.15060000 | 3.43880000  | 0.00000000 |
| 40 | 471.69750000 | 6.71850000  | 0.00000000 |
| 41 | 485.13120000 | 16.14380000 | 0.00000000 |
| 42 | 507.84010000 | 12.52670000 | 0.00000000 |
| 43 | 524.60830000 | 15.36540000 | 0.00000000 |
| 44 | 549.64950000 | 3.13810000  | 0.00000000 |
| 45 | 590.33640000 | 39.02640000 | 0.00000000 |
| 46 | 616.27290000 | 8.26450000  | 0.00000000 |
| 47 | 649.69560000 | 0.89280000  | 0.00000000 |
| 48 | 712.79470000 | 9.83890000  | 0.00000000 |
| 49 | 722.16140000 | 9.36640000  | 0.00000000 |
| 50 | 729.99770000 | 3.18530000  | 0.00000000 |
| 51 | 746.11540000 | 17.29960000 | 0.00000000 |
| 52 | 768.61560000 | 11.76050000 | 0.00000000 |
| 53 | 774.70110000 | 5.50420000  | 0.00000000 |
| 54 | 780.10070000 | 14.60930000 | 0.00000000 |
| 55 | 782.89950000 | 46.99420000 | 0.00000000 |
| 56 | 814.85480000 | 10.62770000 | 0.00000000 |
| 57 | 841.26530000 | 8.08540000  | 0.00000000 |

|     |               |              |            |
|-----|---------------|--------------|------------|
| 58  | 850.68600000  | 46.34200000  | 0.00000000 |
| 59  | 864.60040000  | 45.67990000  | 0.00000000 |
| 60  | 877.00400000  | 7.88050000   | 0.00000000 |
| 61  | 885.31680000  | 14.19880000  | 0.00000000 |
| 62  | 907.57710000  | 40.02330000  | 0.00000000 |
| 63  | 914.57110000  | 38.79580000  | 0.00000000 |
| 64  | 932.08820000  | 0.34720000   | 0.00000000 |
| 65  | 933.31340000  | 0.60570000   | 0.00000000 |
| 66  | 962.35500000  | 21.37210000  | 0.00000000 |
| 67  | 974.73120000  | 0.09930000   | 0.00000000 |
| 68  | 978.31620000  | 0.10350000   | 0.00000000 |
| 69  | 990.50540000  | 0.76930000   | 0.00000000 |
| 70  | 993.32460000  | 56.36780000  | 0.00000000 |
| 71  | 1012.70830000 | 41.17290000  | 0.00000000 |
| 72  | 1025.11830000 | 137.87610000 | 0.00000000 |
| 73  | 1029.70150000 | 152.28270000 | 0.00000000 |
| 74  | 1040.43080000 | 20.83320000  | 0.00000000 |
| 75  | 1046.13990000 | 10.47440000  | 0.00000000 |
| 76  | 1054.87740000 | 0.76570000   | 0.00000000 |
| 77  | 1060.35420000 | 14.73860000  | 0.00000000 |
| 78  | 1069.77050000 | 17.43240000  | 0.00000000 |
| 79  | 1078.34800000 | 13.48710000  | 0.00000000 |
| 80  | 1108.87630000 | 77.08430000  | 0.00000000 |
| 81  | 1141.12240000 | 56.48100000  | 0.00000000 |
| 82  | 1152.46290000 | 82.70820000  | 0.00000000 |
| 83  | 1161.22280000 | 39.00400000  | 0.00000000 |
| 84  | 1173.97860000 | 3.68290000   | 0.00000000 |
| 85  | 1179.62920000 | 381.92750000 | 0.00000000 |
| 86  | 1189.12110000 | 192.83850000 | 0.00000000 |
| 87  | 1200.31290000 | 138.02150000 | 0.00000000 |
| 88  | 1212.42350000 | 38.14140000  | 0.00000000 |
| 89  | 1214.37230000 | 4.90480000   | 0.00000000 |
| 90  | 1226.07370000 | 90.36760000  | 0.00000000 |
| 91  | 1236.74860000 | 127.56000000 | 0.00000000 |
| 92  | 1256.95590000 | 54.41460000  | 0.00000000 |
| 93  | 1271.54330000 | 24.35940000  | 0.00000000 |
| 94  | 1280.37030000 | 141.93900000 | 0.00000000 |
| 95  | 1291.20550000 | 207.10760000 | 0.00000000 |
| 96  | 1292.99720000 | 30.31040000  | 0.00000000 |
| 97  | 1315.13340000 | 39.74260000  | 0.00000000 |
| 98  | 1327.59710000 | 53.06340000  | 0.00000000 |
| 99  | 1339.80920000 | 1.80920000   | 0.00000000 |
| 100 | 1356.66260000 | 15.54890000  | 0.00000000 |

|     |               |              |            |
|-----|---------------|--------------|------------|
| 101 | 1370.66220000 | 55.99190000  | 0.00000000 |
| 102 | 1397.83430000 | 100.01490000 | 0.00000000 |
| 103 | 1399.06140000 | 26.17110000  | 0.00000000 |
| 104 | 1402.61570000 | 28.37510000  | 0.00000000 |
| 105 | 1413.60960000 | 72.55860000  | 0.00000000 |
| 106 | 1419.99340000 | 265.99520000 | 0.00000000 |
| 107 | 1427.53690000 | 41.61160000  | 0.00000000 |
| 108 | 1432.81910000 | 21.60920000  | 0.00000000 |
| 109 | 1466.96800000 | 0.16390000   | 0.00000000 |
| 110 | 1472.29510000 | 20.49770000  | 0.00000000 |
| 111 | 1480.73950000 | 12.28420000  | 0.00000000 |
| 112 | 1483.08190000 | 21.89240000  | 0.00000000 |
| 113 | 1484.49810000 | 5.60930000   | 0.00000000 |
| 114 | 1484.85060000 | 3.52650000   | 0.00000000 |
| 115 | 1485.78680000 | 28.71300000  | 0.00000000 |
| 116 | 1487.98510000 | 6.40330000   | 0.00000000 |
| 117 | 1490.46110000 | 20.26620000  | 0.00000000 |
| 118 | 1493.01740000 | 95.30750000  | 0.00000000 |
| 119 | 1498.08690000 | 1.52580000   | 0.00000000 |
| 120 | 1512.23690000 | 22.67080000  | 0.00000000 |
| 121 | 1518.76460000 | 26.44600000  | 0.00000000 |
| 122 | 1528.90230000 | 103.14370000 | 0.00000000 |
| 123 | 1615.06210000 | 9.05250000   | 0.00000000 |
| 124 | 1636.42380000 | 11.36930000  | 0.00000000 |
| 125 | 1716.36450000 | 810.07100000 | 0.00000000 |
| 126 | 1776.14330000 | 288.33590000 | 0.00000000 |
| 127 | 3035.74950000 | 41.78200000  | 0.00000000 |
| 128 | 3044.58170000 | 12.23410000  | 0.00000000 |
| 129 | 3045.48940000 | 35.00880000  | 0.00000000 |
| 130 | 3052.76760000 | 20.03020000  | 0.00000000 |
| 131 | 3057.83370000 | 35.92690000  | 0.00000000 |
| 132 | 3062.98750000 | 41.40120000  | 0.00000000 |
| 133 | 3070.24360000 | 20.89690000  | 0.00000000 |
| 134 | 3100.52450000 | 28.60610000  | 0.00000000 |
| 135 | 3105.48080000 | 10.09120000  | 0.00000000 |
| 136 | 3107.14290000 | 25.60280000  | 0.00000000 |
| 137 | 3116.85300000 | 44.49600000  | 0.00000000 |
| 138 | 3120.87930000 | 55.31630000  | 0.00000000 |
| 139 | 3126.02340000 | 5.50820000   | 0.00000000 |
| 140 | 3134.69040000 | 5.18300000   | 0.00000000 |
| 141 | 3137.70420000 | 21.63880000  | 0.00000000 |
| 142 | 3143.08340000 | 1.01250000   | 0.00000000 |
| 143 | 3146.22630000 | 24.19380000  | 0.00000000 |

|     |               |             |            |
|-----|---------------|-------------|------------|
| 144 | 3154.76850000 | 4.88990000  | 0.00000000 |
| 145 | 3170.61820000 | 12.62670000 | 0.00000000 |
| 146 | 3200.63320000 | 2.42290000  | 0.00000000 |
| 147 | 3202.32590000 | 2.85180000  | 0.00000000 |
| 148 | 3218.05810000 | 5.48460000  | 0.00000000 |
| 149 | 3226.86590000 | 1.47500000  | 0.00000000 |
| 150 | 3229.31630000 | 2.42310000  | 0.00000000 |

Optimisation Calculation Performed on Chair Conformation of (3*S*,5*S*)-**9c** with *p*-Chlorophenyl Group Axial (Figure S-3b):

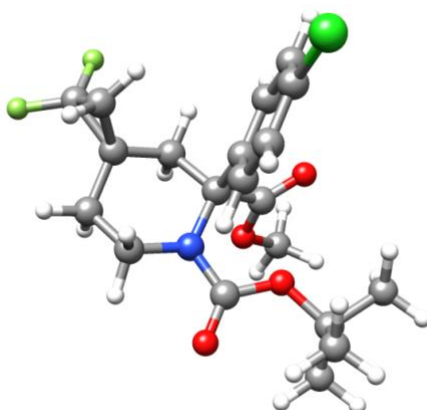

Route : # opt freq b3lyp scrf=(solvent=thf) geom=connectivity def2tzvp  
empiricaldispersion=gd3bj int=ultrafine pop=(regular,mk)

SMILES : COC(=O)C2(c1ccc(Cl)cc1)CC3(CCN2C(=O)OC(C)(C)C)CC3(F)F

Formula : C<sub>20</sub>H<sub>24</sub>ClF<sub>2</sub>NO<sub>4</sub>

Charge : 0

Multiplicity : 1

Dipole : 2.6912 Debye

Energy : -1792.79018093 a.u.

Gibbs Energy : -1792.432280 a.u.

Number of imaginary frequencies : 0

#### Cartesian Coordinates (XYZ format)

52

|   |             |             |             |
|---|-------------|-------------|-------------|
| C | 1.49404800  | -1.39245500 | 0.77584700  |
| C | 2.43809300  | -1.52447200 | -0.38723400 |
| C | 1.79284800  | -2.29310700 | -1.51102200 |
| C | 0.54837000  | -1.55388900 | -1.96484200 |
| C | 0.17371400  | -0.65638400 | 0.39123400  |
| H | 2.46407000  | -2.40419900 | -2.36195200 |
| H | 1.24003500  | -2.39542900 | 1.11956100  |
| H | 1.95190600  | -0.86799200 | 1.60965200  |
| H | 0.85012300  | -0.63652100 | -2.48194800 |
| H | -0.01880500 | -2.15257300 | -2.66926600 |
| H | 1.53292400  | -3.29468800 | -1.15938500 |
| N | -0.36178700 | -1.21912300 | -0.85817200 |
| C | 3.40148100  | -0.36174200 | -0.73439300 |
| H | 3.38112800  | 0.51445100  | -0.10226200 |
| H | 3.60654700  | -0.18429100 | -1.78140600 |
| C | 3.89023500  | -1.61943000 | -0.14588400 |
| F | 4.36879700  | -1.62704600 | 1.12629400  |
| F | 4.64450000  | -2.46972800 | -0.88946600 |

|    |             |             |             |
|----|-------------|-------------|-------------|
| C  | -1.67291100 | -1.01204000 | -1.22241300 |
| O  | -2.13523500 | -1.35621100 | -2.29463700 |
| O  | -2.35073100 | -0.37970400 | -0.25720000 |
| C  | -3.76873200 | 0.00031100  | -0.39821800 |
| C  | -3.92743500 | 0.96396600  | -1.56792500 |
| C  | -4.62728100 | -1.24895600 | -0.54406000 |
| C  | -4.05221300 | 0.70842900  | 0.91956300  |
| H  | -3.24847800 | 1.80997400  | -1.45284300 |
| H  | -3.72787300 | 0.47330200  | -2.51663200 |
| H  | -4.94899200 | 1.34615000  | -1.57807800 |
| H  | -4.43934200 | -1.93652100 | 0.28153700  |
| H  | -5.68008900 | -0.96455500 | -0.51737400 |
| H  | -4.42568700 | -1.75869100 | -1.48252300 |
| H  | -5.08525000 | 1.05606200  | 0.93313700  |
| H  | -3.89958900 | 0.03599900  | 1.76291900  |
| H  | -3.39153100 | 1.56655000  | 1.04137600  |
| C  | -0.76750000 | -0.99006600 | 1.57751400  |
| O  | -0.99390700 | -0.25095900 | 2.50005800  |
| O  | -1.18760300 | -2.25619800 | 1.51679600  |
| C  | 0.41647600  | 0.85311500  | 0.29322400  |
| C  | 0.09308600  | 1.56802700  | -0.85554000 |
| C  | 0.99537700  | 1.55015600  | 1.35538700  |
| C  | 0.33970400  | 2.93191600  | -0.95640100 |
| H  | -0.35922800 | 1.07557800  | -1.70192900 |
| C  | 1.24807400  | 2.91123500  | 1.27536500  |
| H  | 1.24601700  | 1.03821400  | 2.27183000  |
| C  | 0.91864000  | 3.59391200  | 0.11311100  |
| H  | 0.08295700  | 3.46883100  | -1.85833200 |
| H  | 1.69374200  | 3.43575500  | 2.10844800  |
| Cl | 1.23796900  | 5.30909900  | -0.00069200 |
| C  | -2.01283200 | -2.70437500 | 2.60570300  |
| H  | -2.92359500 | -2.11023800 | 2.65622100  |
| H  | -2.24726200 | -3.74077800 | 2.38429200  |
| H  | -1.47401200 | -2.62456500 | 3.54824200  |

### Frequencies

| Mode | IR frequency | IR intensity | Raman intensity |
|------|--------------|--------------|-----------------|
| 1    | 24.04800000  | 0.06870000   | 0.00000000      |
| 2    | 30.35410000  | 0.23900000   | 0.00000000      |
| 3    | 34.41930000  | 0.09110000   | 0.00000000      |
| 4    | 55.25640000  | 1.67430000   | 0.00000000      |
| 5    | 60.94370000  | 1.38630000   | 0.00000000      |
| 6    | 76.99310000  | 1.59520000   | 0.00000000      |
| 7    | 85.60280000  | 2.94540000   | 0.00000000      |
| 8    | 86.78390000  | 1.22510000   | 0.00000000      |
| 9    | 94.42690000  | 1.79330000   | 0.00000000      |
| 10   | 103.19600000 | 1.71520000   | 0.00000000      |
| 11   | 128.16760000 | 0.73440000   | 0.00000000      |
| 12   | 131.70710000 | 2.70970000   | 0.00000000      |
| 13   | 140.98800000 | 0.50190000   | 0.00000000      |

|    |              |             |            |
|----|--------------|-------------|------------|
| 14 | 155.14650000 | 0.67510000  | 0.00000000 |
| 15 | 165.35390000 | 1.97120000  | 0.00000000 |
| 16 | 174.57940000 | 0.57790000  | 0.00000000 |
| 17 | 192.49990000 | 4.15430000  | 0.00000000 |
| 18 | 202.70350000 | 0.30420000  | 0.00000000 |
| 19 | 214.04090000 | 1.45920000  | 0.00000000 |
| 20 | 224.39030000 | 5.78760000  | 0.00000000 |
| 21 | 238.57930000 | 1.37180000  | 0.00000000 |
| 22 | 245.24090000 | 0.38980000  | 0.00000000 |
| 23 | 258.50440000 | 1.06630000  | 0.00000000 |
| 24 | 269.37840000 | 4.40560000  | 0.00000000 |
| 25 | 272.85880000 | 2.40850000  | 0.00000000 |
| 26 | 305.41890000 | 4.39440000  | 0.00000000 |
| 27 | 327.77470000 | 7.97410000  | 0.00000000 |
| 28 | 344.42380000 | 0.51490000  | 0.00000000 |
| 29 | 349.36270000 | 6.15460000  | 0.00000000 |
| 30 | 356.04500000 | 2.63940000  | 0.00000000 |
| 31 | 369.66470000 | 15.67360000 | 0.00000000 |
| 32 | 383.09180000 | 5.82090000  | 0.00000000 |
| 33 | 407.87430000 | 8.32740000  | 0.00000000 |
| 34 | 417.32920000 | 11.27110000 | 0.00000000 |
| 35 | 426.01940000 | 5.07530000  | 0.00000000 |
| 36 | 431.43610000 | 8.00730000  | 0.00000000 |
| 37 | 442.22570000 | 1.61840000  | 0.00000000 |
| 38 | 448.11550000 | 1.80720000  | 0.00000000 |
| 39 | 462.29300000 | 6.95820000  | 0.00000000 |
| 40 | 473.74720000 | 4.96740000  | 0.00000000 |
| 41 | 482.96980000 | 25.06140000 | 0.00000000 |
| 42 | 489.84660000 | 1.69860000  | 0.00000000 |
| 43 | 518.32670000 | 18.70920000 | 0.00000000 |
| 44 | 568.39670000 | 19.39500000 | 0.00000000 |
| 45 | 580.61150000 | 32.54280000 | 0.00000000 |
| 46 | 648.56890000 | 6.93690000  | 0.00000000 |
| 47 | 655.28020000 | 8.20340000  | 0.00000000 |
| 48 | 705.47320000 | 25.76990000 | 0.00000000 |
| 49 | 723.04150000 | 10.77440000 | 0.00000000 |
| 50 | 734.87410000 | 1.97630000  | 0.00000000 |
| 51 | 756.20990000 | 31.44080000 | 0.00000000 |
| 52 | 770.40330000 | 3.33310000  | 0.00000000 |
| 53 | 784.16280000 | 29.98780000 | 0.00000000 |
| 54 | 785.87780000 | 21.53770000 | 0.00000000 |
| 55 | 800.75000000 | 12.61430000 | 0.00000000 |
| 56 | 801.99520000 | 19.99310000 | 0.00000000 |

|    |               |              |            |
|----|---------------|--------------|------------|
| 57 | 841.24350000  | 3.91790000   | 0.00000000 |
| 58 | 847.16050000  | 26.05870000  | 0.00000000 |
| 59 | 856.83630000  | 49.35990000  | 0.00000000 |
| 60 | 859.29810000  | 40.96960000  | 0.00000000 |
| 61 | 890.83470000  | 7.21300000   | 0.00000000 |
| 62 | 911.14240000  | 48.14460000  | 0.00000000 |
| 63 | 915.03320000  | 9.18230000   | 0.00000000 |
| 64 | 931.54190000  | 0.07570000   | 0.00000000 |
| 65 | 933.02950000  | 0.65480000   | 0.00000000 |
| 66 | 959.48650000  | 40.25770000  | 0.00000000 |
| 67 | 974.95730000  | 0.18130000   | 0.00000000 |
| 68 | 979.18860000  | 1.58480000   | 0.00000000 |
| 69 | 988.26310000  | 0.03700000   | 0.00000000 |
| 70 | 1000.74920000 | 22.13360000  | 0.00000000 |
| 71 | 1025.86770000 | 78.11940000  | 0.00000000 |
| 72 | 1029.86520000 | 118.35400000 | 0.00000000 |
| 73 | 1036.83330000 | 93.41290000  | 0.00000000 |
| 74 | 1042.96200000 | 32.67970000  | 0.00000000 |
| 75 | 1046.98410000 | 24.92820000  | 0.00000000 |
| 76 | 1053.99280000 | 29.42150000  | 0.00000000 |
| 77 | 1054.36090000 | 1.10850000   | 0.00000000 |
| 78 | 1063.86440000 | 3.98640000   | 0.00000000 |
| 79 | 1098.53290000 | 62.67130000  | 0.00000000 |
| 80 | 1110.61820000 | 117.75970000 | 0.00000000 |
| 81 | 1143.83040000 | 57.43870000  | 0.00000000 |
| 82 | 1150.67490000 | 190.10490000 | 0.00000000 |
| 83 | 1161.48540000 | 36.13920000  | 0.00000000 |
| 84 | 1170.90470000 | 23.00920000  | 0.00000000 |
| 85 | 1173.07390000 | 3.15100000   | 0.00000000 |
| 86 | 1182.11760000 | 148.06360000 | 0.00000000 |
| 87 | 1190.10890000 | 394.22910000 | 0.00000000 |
| 88 | 1202.53540000 | 68.84760000  | 0.00000000 |
| 89 | 1210.48280000 | 31.17510000  | 0.00000000 |
| 90 | 1218.04150000 | 4.19950000   | 0.00000000 |
| 91 | 1250.08560000 | 100.33120000 | 0.00000000 |
| 92 | 1252.82850000 | 522.38280000 | 0.00000000 |
| 93 | 1271.59240000 | 30.22360000  | 0.00000000 |
| 94 | 1282.75010000 | 31.97710000  | 0.00000000 |
| 95 | 1296.19880000 | 63.81300000  | 0.00000000 |
| 96 | 1305.57830000 | 74.52790000  | 0.00000000 |
| 97 | 1314.51880000 | 48.36130000  | 0.00000000 |
| 98 | 1324.76300000 | 25.99690000  | 0.00000000 |
| 99 | 1341.45900000 | 4.79790000   | 0.00000000 |



|     |               |              |            |
|-----|---------------|--------------|------------|
| 100 | 1362.36680000 | 192.04800000 | 0.00000000 |
| 101 | 1381.96370000 | 26.62720000  | 0.00000000 |
| 102 | 1386.43960000 | 275.62700000 | 0.00000000 |
| 103 | 1398.80580000 | 25.15360000  | 0.00000000 |
| 104 | 1403.42740000 | 45.09970000  | 0.00000000 |
| 105 | 1414.21460000 | 48.36290000  | 0.00000000 |
| 106 | 1425.46080000 | 6.54780000   | 0.00000000 |
| 107 | 1427.02180000 | 18.31760000  | 0.00000000 |
| 108 | 1434.53740000 | 23.48970000  | 0.00000000 |
| 109 | 1467.11410000 | 0.07330000   | 0.00000000 |
| 110 | 1472.00490000 | 14.85710000  | 0.00000000 |
| 111 | 1480.21260000 | 11.25480000  | 0.00000000 |
| 112 | 1482.62100000 | 7.26850000   | 0.00000000 |
| 113 | 1483.93750000 | 2.31400000   | 0.00000000 |
| 114 | 1485.97100000 | 3.34740000   | 0.00000000 |
| 115 | 1488.02420000 | 11.99510000  | 0.00000000 |
| 116 | 1489.06210000 | 22.35880000  | 0.00000000 |
| 117 | 1494.81580000 | 155.45500000 | 0.00000000 |
| 118 | 1498.56310000 | 2.77290000   | 0.00000000 |
| 119 | 1501.11510000 | 21.17090000  | 0.00000000 |
| 120 | 1508.51850000 | 11.41000000  | 0.00000000 |
| 121 | 1517.78770000 | 21.69350000  | 0.00000000 |
| 122 | 1531.64690000 | 86.73830000  | 0.00000000 |
| 123 | 1616.39890000 | 11.04000000  | 0.00000000 |
| 124 | 1637.90120000 | 18.28590000  | 0.00000000 |
| 125 | 1714.81560000 | 739.86230000 | 0.00000000 |
| 126 | 1774.82920000 | 283.47410000 | 0.00000000 |
| 127 | 3005.82300000 | 45.07840000  | 0.00000000 |
| 128 | 3044.26780000 | 37.17060000  | 0.00000000 |
| 129 | 3046.15180000 | 37.12100000  | 0.00000000 |
| 130 | 3046.76620000 | 10.28250000  | 0.00000000 |
| 131 | 3054.14940000 | 20.79330000  | 0.00000000 |
| 132 | 3060.59730000 | 46.25390000  | 0.00000000 |
| 133 | 3072.93150000 | 22.23560000  | 0.00000000 |
| 134 | 3103.97050000 | 23.60430000  | 0.00000000 |
| 135 | 3106.11120000 | 12.26380000  | 0.00000000 |
| 136 | 3107.64340000 | 26.79150000  | 0.00000000 |
| 137 | 3120.07460000 | 47.50880000  | 0.00000000 |
| 138 | 3123.20910000 | 49.89570000  | 0.00000000 |
| 139 | 3133.09920000 | 23.73060000  | 0.00000000 |
| 140 | 3137.44470000 | 10.69710000  | 0.00000000 |
| 141 | 3143.53140000 | 4.14730000   | 0.00000000 |
| 142 | 3144.70830000 | 2.53270000   | 0.00000000 |

|     |               |             |            |
|-----|---------------|-------------|------------|
| 143 | 3147.70170000 | 7.86560000  | 0.00000000 |
| 144 | 3147.96900000 | 23.21840000 | 0.00000000 |
| 145 | 3167.21400000 | 14.41630000 | 0.00000000 |
| 146 | 3202.00120000 | 4.28190000  | 0.00000000 |
| 147 | 3203.42100000 | 1.21390000  | 0.00000000 |
| 148 | 3219.07580000 | 5.71210000  | 0.00000000 |
| 149 | 3225.53950000 | 5.46180000  | 0.00000000 |
| 150 | 3236.42000000 | 0.72350000  | 0.00000000 |

Optimisation Calculation Performed on Chair Conformation of (3*S*,5*S*)-**9c** with *p*-Chlorophenyl

Group Equatorial (Figure S-3c):

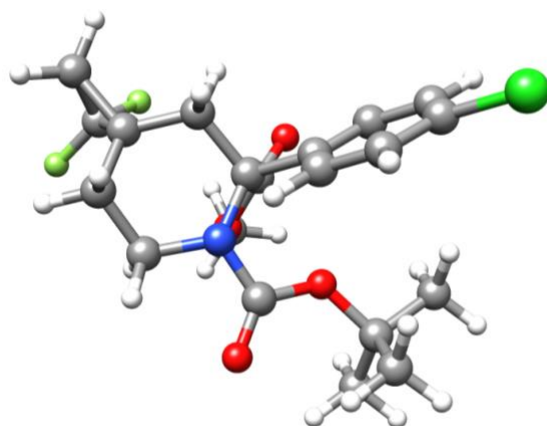

Route : # opt freq b3lyp scrf=(solvent=thf) geom=connectivity def2tzvp  
empiricaldispersion=gd3bj int=ultrafine pop=(regular,mk)

SMILES : COC(=O)C2(c1ccc(Cl)cc1)CC3(CCN2C(=O)OC(C)(C)C)CC3(F)F

Formula : C<sub>20</sub>H<sub>24</sub>ClF<sub>2</sub>NO<sub>4</sub>

Charge : 0

Multiplicity : 1

Dipole : 1.8449 Debye

Energy : -1792.78846948 a.u.

Gibbs Energy : -1792.431337 a.u.

Number of imaginary frequencies : 0

Cartesian Coordinates (XYZ format)

52

|   |             |             |             |
|---|-------------|-------------|-------------|
| C | -1.96596300 | 0.64864400  | -1.84641800 |
| C | -2.67412900 | -0.66995000 | -2.08934200 |
| C | -2.80195500 | -1.42845800 | -0.79457300 |
| C | -1.44343100 | -1.71404800 | -0.21516400 |
| C | -0.56842500 | -0.44247700 | 0.01538100  |
| H | -3.64693400 | -0.46071400 | -2.53299800 |
| H | -2.63184300 | 1.31903300  | -1.29538900 |
| H | -1.72589600 | 1.12665100  | -2.79078800 |
| H | -1.49563900 | -2.24363900 | 0.73379000  |
| H | -0.91505600 | -2.35824000 | -0.91827200 |
| H | -2.11243600 | -1.28534700 | -2.79712000 |
| C | 0.87805600  | -0.96730800 | 0.09146300  |
| C | 1.54262100  | -1.20967800 | -1.11198500 |
| C | 1.53165000  | -1.28119600 | 1.27804000  |
| C | 2.83375100  | -1.71227700 | -1.13740900 |
| H | 1.05495300  | -0.97964700 | -2.04857400 |
| C | 2.82685000  | -1.78854200 | 1.26932600  |
| H | 1.04300600  | -1.12109000 | 2.22429700  |

|    |             |             |             |
|----|-------------|-------------|-------------|
| C  | 3.47211700  | -1.99349200 | 0.06219500  |
| H  | 3.33906700  | -1.87919500 | -2.07806600 |
| H  | 3.32752200  | -2.01458700 | 2.20015600  |
| C  | -1.07431800 | 0.18654800  | 1.33514000  |
| O  | -0.94076600 | -0.31057200 | 2.42638400  |
| O  | -1.76396000 | 1.30640500  | 1.11951900  |
| C  | 0.07063000  | 1.65370300  | -1.11418600 |
| O  | -0.04429200 | 2.52375300  | -1.95739900 |
| O  | 0.93277000  | 1.67723900  | -0.09421600 |
| C  | 2.00338200  | 2.68242700  | 0.01699100  |
| C  | 2.90216200  | 2.61861300  | -1.21162400 |
| C  | 1.39374600  | 4.06189700  | 0.23188800  |
| C  | 2.75795000  | 2.22319600  | 1.25766500  |
| H  | 3.26153700  | 1.59959100  | -1.36076200 |
| H  | 2.37710100  | 2.94592100  | -2.10531500 |
| H  | 3.76569300  | 3.26669900  | -1.05619700 |
| H  | 0.71291200  | 4.04314900  | 1.08419100  |
| H  | 2.18946300  | 4.77687700  | 0.44613900  |
| H  | 0.84974300  | 4.39382500  | -0.64824600 |
| H  | 3.57785200  | 2.91119200  | 1.46478500  |
| H  | 2.09443700  | 2.20183600  | 2.12273100  |
| H  | 3.16631100  | 1.22413900  | 1.11028600  |
| C  | -2.34862900 | 1.92963800  | 2.27834100  |
| H  | -3.03310600 | 1.23940000  | 2.76696900  |
| H  | -1.56783600 | 2.22972300  | 2.97479600  |
| H  | -2.87970400 | 2.79752300  | 1.90123500  |
| C  | -3.91298700 | -2.48693500 | -0.63447300 |
| H  | -3.68382400 | -3.36961700 | -0.05246700 |
| H  | -4.58480000 | -2.62974000 | -1.47026300 |
| C  | -3.97230000 | -1.20046700 | 0.08070000  |
| F  | -3.82485900 | -1.17723900 | 1.43144000  |
| F  | -4.90700300 | -0.27596300 | -0.26058300 |
| Cl | 5.10814900  | -2.61446700 | 0.04568200  |
| N  | -0.70128400 | 0.50819600  | -1.10217900 |

### Frequencies

| Mode | IR frequency | IR intensity | Raman intensity |
|------|--------------|--------------|-----------------|
| 1    | 22.16750000  | 0.63060000   | 0.00000000      |
| 2    | 29.62470000  | 1.44240000   | 0.00000000      |
| 3    | 37.60290000  | 0.26200000   | 0.00000000      |
| 4    | 40.64840000  | 2.86990000   | 0.00000000      |
| 5    | 49.42170000  | 1.56060000   | 0.00000000      |
| 6    | 54.24010000  | 1.61210000   | 0.00000000      |
| 7    | 67.74400000  | 0.18170000   | 0.00000000      |
| 8    | 82.51690000  | 2.67690000   | 0.00000000      |
| 9    | 104.10070000 | 2.56860000   | 0.00000000      |
| 10   | 117.01490000 | 0.72760000   | 0.00000000      |
| 11   | 120.37250000 | 0.42750000   | 0.00000000      |
| 12   | 138.43450000 | 0.98080000   | 0.00000000      |
| 13   | 143.83310000 | 0.20160000   | 0.00000000      |

|    |              |             |            |
|----|--------------|-------------|------------|
| 14 | 148.80730000 | 1.88200000  | 0.00000000 |
| 15 | 167.58260000 | 1.57570000  | 0.00000000 |
| 16 | 172.23040000 | 1.57240000  | 0.00000000 |
| 17 | 196.02340000 | 6.29160000  | 0.00000000 |
| 18 | 205.39530000 | 2.92990000  | 0.00000000 |
| 19 | 209.94150000 | 0.06560000  | 0.00000000 |
| 20 | 227.29180000 | 0.35390000  | 0.00000000 |
| 21 | 245.26020000 | 0.24250000  | 0.00000000 |
| 22 | 246.48720000 | 1.72420000  | 0.00000000 |
| 23 | 270.15400000 | 2.39170000  | 0.00000000 |
| 24 | 279.33210000 | 0.33280000  | 0.00000000 |
| 25 | 289.34290000 | 1.81970000  | 0.00000000 |
| 26 | 311.85040000 | 2.50340000  | 0.00000000 |
| 27 | 338.26390000 | 19.99470000 | 0.00000000 |
| 28 | 348.54700000 | 9.33170000  | 0.00000000 |
| 29 | 354.54990000 | 2.49640000  | 0.00000000 |
| 30 | 360.76450000 | 5.79470000  | 0.00000000 |
| 31 | 365.68690000 | 20.31290000 | 0.00000000 |
| 32 | 384.92890000 | 21.06300000 | 0.00000000 |
| 33 | 388.77070000 | 1.84020000  | 0.00000000 |
| 34 | 408.21280000 | 1.23510000  | 0.00000000 |
| 35 | 420.49660000 | 0.16670000  | 0.00000000 |
| 36 | 433.32600000 | 4.02440000  | 0.00000000 |
| 37 | 442.72710000 | 8.36450000  | 0.00000000 |
| 38 | 456.40700000 | 3.04070000  | 0.00000000 |
| 39 | 467.47390000 | 6.48140000  | 0.00000000 |
| 40 | 474.20410000 | 3.68650000  | 0.00000000 |
| 41 | 488.68180000 | 22.82370000 | 0.00000000 |
| 42 | 516.73340000 | 5.63600000  | 0.00000000 |
| 43 | 529.75890000 | 7.58300000  | 0.00000000 |
| 44 | 548.36110000 | 2.16500000  | 0.00000000 |
| 45 | 569.05120000 | 5.52230000  | 0.00000000 |
| 46 | 609.95920000 | 41.04570000 | 0.00000000 |
| 47 | 650.78960000 | 0.65330000  | 0.00000000 |
| 48 | 710.97560000 | 9.17700000  | 0.00000000 |
| 49 | 720.37760000 | 12.70610000 | 0.00000000 |
| 50 | 737.17270000 | 9.61270000  | 0.00000000 |
| 51 | 749.04740000 | 13.93990000 | 0.00000000 |
| 52 | 765.66490000 | 12.36740000 | 0.00000000 |
| 53 | 775.37680000 | 18.67020000 | 0.00000000 |
| 54 | 791.92720000 | 44.07170000 | 0.00000000 |
| 55 | 811.01690000 | 22.57540000 | 0.00000000 |
| 56 | 819.25910000 | 10.77950000 | 0.00000000 |

|    |               |              |            |
|----|---------------|--------------|------------|
| 57 | 846.57520000  | 2.83530000   | 0.00000000 |
| 58 | 853.10630000  | 11.15020000  | 0.00000000 |
| 59 | 856.97030000  | 98.53710000  | 0.00000000 |
| 60 | 873.32760000  | 17.40000000  | 0.00000000 |
| 61 | 886.13020000  | 10.80390000  | 0.00000000 |
| 62 | 910.77660000  | 49.29250000  | 0.00000000 |
| 63 | 916.42780000  | 15.31540000  | 0.00000000 |
| 64 | 931.98760000  | 0.46770000   | 0.00000000 |
| 65 | 932.26800000  | 0.02570000   | 0.00000000 |
| 66 | 966.00400000  | 5.69670000   | 0.00000000 |
| 67 | 974.80730000  | 0.14060000   | 0.00000000 |
| 68 | 984.73370000  | 0.30320000   | 0.00000000 |
| 69 | 996.56050000  | 0.36420000   | 0.00000000 |
| 70 | 1009.48680000 | 48.49370000  | 0.00000000 |
| 71 | 1018.11850000 | 72.46260000  | 0.00000000 |
| 72 | 1023.20230000 | 60.96880000  | 0.00000000 |
| 73 | 1036.24290000 | 179.57140000 | 0.00000000 |
| 74 | 1039.36290000 | 31.65090000  | 0.00000000 |
| 75 | 1048.88460000 | 5.53870000   | 0.00000000 |
| 76 | 1054.40080000 | 2.07640000   | 0.00000000 |
| 77 | 1058.28210000 | 14.67230000  | 0.00000000 |
| 78 | 1067.25840000 | 10.95810000  | 0.00000000 |
| 79 | 1080.02000000 | 27.09940000  | 0.00000000 |
| 80 | 1109.48610000 | 62.56310000  | 0.00000000 |
| 81 | 1140.90530000 | 68.04660000  | 0.00000000 |
| 82 | 1147.46960000 | 58.46790000  | 0.00000000 |
| 83 | 1165.07480000 | 96.73390000  | 0.00000000 |
| 84 | 1172.88440000 | 0.65740000   | 0.00000000 |
| 85 | 1173.92970000 | 18.83830000  | 0.00000000 |
| 86 | 1183.31900000 | 507.85630000 | 0.00000000 |
| 87 | 1193.32680000 | 132.13240000 | 0.00000000 |
| 88 | 1203.26910000 | 78.30150000  | 0.00000000 |
| 89 | 1209.81130000 | 26.42700000  | 0.00000000 |
| 90 | 1218.61560000 | 63.40970000  | 0.00000000 |
| 91 | 1236.34240000 | 112.82320000 | 0.00000000 |
| 92 | 1260.84620000 | 121.85620000 | 0.00000000 |
| 93 | 1271.60560000 | 25.64660000  | 0.00000000 |
| 94 | 1281.48500000 | 54.42030000  | 0.00000000 |
| 95 | 1293.76070000 | 81.25360000  | 0.00000000 |
| 96 | 1306.31120000 | 161.93930000 | 0.00000000 |
| 97 | 1315.11220000 | 39.17990000  | 0.00000000 |
| 98 | 1324.16240000 | 45.45610000  | 0.00000000 |
| 99 | 1336.94120000 | 17.29160000  | 0.00000000 |

|     |               |              |            |
|-----|---------------|--------------|------------|
| 100 | 1352.22740000 | 219.85070000 | 0.00000000 |
| 101 | 1373.53700000 | 266.36320000 | 0.00000000 |
| 102 | 1383.01860000 | 12.26930000  | 0.00000000 |
| 103 | 1398.04740000 | 24.77550000  | 0.00000000 |
| 104 | 1402.21970000 | 37.85100000  | 0.00000000 |
| 105 | 1414.86050000 | 15.76600000  | 0.00000000 |
| 106 | 1425.04690000 | 22.41520000  | 0.00000000 |
| 107 | 1427.30820000 | 12.20720000  | 0.00000000 |
| 108 | 1434.37380000 | 23.55820000  | 0.00000000 |
| 109 | 1467.62200000 | 0.23930000   | 0.00000000 |
| 110 | 1470.87900000 | 15.05350000  | 0.00000000 |
| 111 | 1478.35300000 | 6.27730000   | 0.00000000 |
| 112 | 1480.39500000 | 12.88360000  | 0.00000000 |
| 113 | 1485.03960000 | 3.46150000   | 0.00000000 |
| 114 | 1485.78840000 | 1.16650000   | 0.00000000 |
| 115 | 1487.03090000 | 5.47260000   | 0.00000000 |
| 116 | 1488.27860000 | 18.08780000  | 0.00000000 |
| 117 | 1488.56710000 | 22.75410000  | 0.00000000 |
| 118 | 1497.66270000 | 2.33990000   | 0.00000000 |
| 119 | 1503.03890000 | 130.28120000 | 0.00000000 |
| 120 | 1512.95570000 | 9.19620000   | 0.00000000 |
| 121 | 1517.06440000 | 22.67490000  | 0.00000000 |
| 122 | 1525.76910000 | 134.25210000 | 0.00000000 |
| 123 | 1613.67040000 | 6.37270000   | 0.00000000 |
| 124 | 1634.88300000 | 1.42880000   | 0.00000000 |
| 125 | 1715.47990000 | 738.24860000 | 0.00000000 |
| 126 | 1765.03600000 | 256.73440000 | 0.00000000 |
| 127 | 3027.40130000 | 36.77370000  | 0.00000000 |
| 128 | 3042.44080000 | 44.34670000  | 0.00000000 |
| 129 | 3043.71550000 | 13.04450000  | 0.00000000 |
| 130 | 3044.53810000 | 34.15040000  | 0.00000000 |
| 131 | 3051.91090000 | 21.99840000  | 0.00000000 |
| 132 | 3064.18850000 | 36.96270000  | 0.00000000 |
| 133 | 3068.06410000 | 20.62260000  | 0.00000000 |
| 134 | 3102.54640000 | 27.65470000  | 0.00000000 |
| 135 | 3103.76760000 | 14.00380000  | 0.00000000 |
| 136 | 3107.01270000 | 17.29050000  | 0.00000000 |
| 137 | 3115.14750000 | 57.84340000  | 0.00000000 |
| 138 | 3124.17840000 | 4.80630000   | 0.00000000 |
| 139 | 3124.38920000 | 35.27290000  | 0.00000000 |
| 140 | 3136.78970000 | 7.07720000   | 0.00000000 |
| 141 | 3136.98690000 | 10.40500000  | 0.00000000 |
| 142 | 3140.08760000 | 18.61170000  | 0.00000000 |

|     |               |             |            |
|-----|---------------|-------------|------------|
| 143 | 3141.80440000 | 5.55920000  | 0.00000000 |
| 144 | 3146.81920000 | 19.64880000 | 0.00000000 |
| 145 | 3171.94620000 | 12.32600000 | 0.00000000 |
| 146 | 3194.53620000 | 2.14850000  | 0.00000000 |
| 147 | 3201.45700000 | 3.43310000  | 0.00000000 |
| 148 | 3208.65440000 | 3.12650000  | 0.00000000 |
| 149 | 3228.99130000 | 0.96610000  | 0.00000000 |
| 150 | 3245.21330000 | 9.30730000  | 0.00000000 |
